# Supplementary material for: The Human TOR Signaling Regulator Is the Key Indicator of Liver Cancer Patients’ Overall Survival: TIPRL/LC3/CD133/CD44 as Potential Biomarkers for Early Liver Cancers
Source: Cancers (Basel). 2021 Jun 11;13(12):2925. doi: 10.3390/cancers13122925 (PMC8230774; doi:10.3390/cancers13122925)
Supplement: Supplementary file 1 [file cancers-13-02925-s001.zip]

Archive with 13 entries (13 files):
- cancers-1253676-supplementary_0611.pdf
- Table S1.xlsx
- Table S10.xlsx
- Table S11.xlsx
- Table S12.xlsx
- Table S2.xlsx
- Table S3.xlsx
- Table S4.xlsx
- Table S5.xlsx
- Table S6.xlsx
- Table S7.xlsx
- Table S8.xlsx
- Table S9.xlsx
