# Supplementary material for: The Human TOR Signaling Regulator Is the Key Indicator of Liver Cancer Patients’ Overall Survival: TIPRL/LC3/CD133/CD44 as Potential Biomarkers for Early Liver Cancers
Source: Cancers (Basel). 2021 Jun 11;13(12):2925. doi: 10.3390/cancers13122925 (PMC8230774; doi:10.3390/cancers13122925)
Supplement: Supplementary file 1 [file cancers-13-02925-s001.zip › Table S1.xlsx]

## Sheet: Sheet1
Table S1. The baseline pathophysiological characteristics of the patients in the training and the validation set
Variables			Training Set					Validation Set
Clinicopathological Features					N		%			N		%
Age (range)			54±0.3 (38-72)		790		100	56±0.4 (27-76)		649		100
£50 years			45±0.2 (38-50)		249		31.519	39.9±0.6 (27-50)		140		21.5716
>50 years			58±0.3 (51-72)		541		68.481	60.4±0.3 (50-76)		509		78.4284
Sex					790		100			649		100
Male					702		88.8608			388		59.7843
Female					88		11.1392			261		40.2157
Subtypes					790		100			649		100
Hepatocellular carcinoma					385		48.7342			155		23.8829
Intrahepatic cholangiocarcinoma					0		0			390		60.0924
Mixed carcinoma					0		0			32		4.93066
Chronic hepatitis					281		35.5696			0		0
Cirrhosis					56		7.08861			0		0
Hepatic steatosis					28		3.5443			0		0
Liver cell degeneration					8		1.01266			0		0
Liver tissue degeneration					8		1.01266			0		0
Inflammation of portal area					8		1.01266			0		0
Carcinoid					0		0			16		2.46533
Adenosquamous carcinoma					0		0			16		2.46533
Normal liver tissue					16		2.02532			40		6.16333
AJCC stage					790		100			649		100
I					89		11.2658			0		0
II					493		62.4051			28		4.31433
IIIA					96		12.1519			12		1.849
IVA/B					96		12.1519			553		85.208
NA					16		2.02532			56		8.62866
Pathological Tumour size					790		100			649		100
T1					46		5.82278			0		0
T2					267		33.7975			189		29.1217
T3					40		5.06329			374		57.6271
T4					40		5.06329			30		4.6225
NA					397		50.2532			56		8.62866
Pathological Node status					790		100			649		100
N0					385		48.7342			56		8.62866
N1					8		1.01266			537		82.7427
NA					397		50.2532			56		8.62866
Pathological Metastasis status					790		100			649		100
M0					389		49.2405			563		86.7488
M1					4		0.506329			30		4.6225
NA					397		50.2532			56		8.62866
Tumour diferentiation					790		100			649		100
G1					67		8.48101			82		12.6348
G1-G2					46		5.82278			0		0
G2					480		60.7595			278		42.8351
G2-G3					48		6.07595			0		0
G3					108		13.6709			137		21.1094
NA					41		5.18987			152		23.4206
Overall Survival			54.0±0.3 (0-60)		790		100	56.0±0.4 (27-76)		649		100
Alive			54.7±0.4 (38-72)		437		55.3165	56.1±0.5 (27-76)		457		70.416
Dead			53.1±0.4 (39-67)		353		44.6835	55.7±0.8 (27-76)		192		29.584
