# Supplementary material for: The Human TOR Signaling Regulator Is the Key Indicator of Liver Cancer Patients’ Overall Survival: TIPRL/LC3/CD133/CD44 as Potential Biomarkers for Early Liver Cancers
Source: Cancers (Basel). 2021 Jun 11;13(12):2925. doi: 10.3390/cancers13122925 (PMC8230774; doi:10.3390/cancers13122925)
Supplement: Supplementary file 1 [file cancers-13-02925-s001.zip › Table S2.xlsx]

## Sheet: Sheet1
Table S2. Expression of covariates, TIPRL, LC3, CD133, CD44, and several clinic-pathological parameters in the training set
	TIPRL	LC3	CD133	CD44	Age	Sex	Organ/Anatomic Site	Diagnosis	TNM	Grade	Stage	Type	status	months
1	0.118393		-0.127462	0.0299212	39	male	Liver	Hepatocellular carcinoma	T1N0M0	G2	1	tumor	1	49
2	0.338427		-0.024997	-0.221429	39	male	Liver	Hepatocellular carcinoma	T1N0M0	G2	1	tumor	1	49
3	-0.268804		-0.350181	0.268902	39	male	Liver	Hepatocellular carcinoma	T1N0M0	G2	1	tumor	1	49
4	-0.119666		-0.139138	0.0795668	39	male	Liver	Hepatocellular carcinoma	T1N0M0	G2	1	tumor	1	49
5	0.637001		0.462711	0.485707	39	male	Liver	Chronic hepatitis					1	49
6	0.589317		0.491617	0.451029	39	male	Liver	Chronic hepatitis					1	49
7	0.66598		0.354745	0.228358	39	male	Liver	Chronic hepatitis					1	49
8	0.0877545		0.0849261	0.398219	39	male	Liver	Chronic hepatitis					1	49
9	0.903761		-0.479704	0.0560909	43	male	Liver	Hepatocellular carcinoma	T1N0M0	G2	1	tumor	1	42
10	0.893217		-0.44329	0.2131	43	male	Liver	Hepatocellular carcinoma	T1N0M0	G2	1	tumor	1	42
11	1.05902		-0.403026	0.089143	43	male	Liver	Hepatocellular carcinoma	T1N0M0	G2	1	tumor	1	42
12	0.8248		-0.441191	-0.259262	43	male	Liver	Hepatocellular carcinoma	T1N0M0	G2	1	tumor	1	42
13	0.704352		-0.13673	0.140395	43	male	Liver	Chronic hepatitis					1	42
14	0.748772		-0.163269	0.0390291	43	male	Liver	Chronic hepatitis					1	42
15	0.742676		-0.240614	0.148419	43	male	Liver	Chronic hepatitis					1	42
16	0.816312		-0.242573	0.0541781	43	male	Liver	Chronic hepatitis					1	42
17	0.580592		0.310412	0.550146	55	male	Liver	Hepatocellular carcinoma	T1N0M0	G2	1	tumor	1	41
18	0.515002		0.185013	0.0863567	55	male	Liver	Hepatocellular carcinoma	T1N0M0	G2	1	tumor	1	41
19	0.367717		0.152534	0.321257	55	male	Liver	Hepatocellular carcinoma	T1N0M0	G2	1	tumor	1	41
20	0.560796		0.316381	0.490962	55	male	Liver	Hepatocellular carcinoma	T1N0M0	G2	1	tumor	1	41
21	-0.339947		-0.233057	0.0476604	55	male	Liver	Cirrhosis					1	41
22	-0.109806		-0.132885	-0.195629	55	male	Liver	Cirrhosis					1	41
23	-0.0628936		-0.410054	-0.797988	55	male	Liver	Cirrhosis					1	41
24	-0.0388916		-0.153955	-0.558124	55	male	Liver	Cirrhosis					1	41
25	0.143598		-0.54675	-0.77162	61	male	Liver	Hepatocellular carcinoma	T1N0M0	G2	1	tumor	1	37
26	0.145891		-0.553343	-0.781724	61	male	Liver	Hepatocellular carcinoma	T1N0M0	G2	1	tumor	1	37
27	0.145009		-0.508347	-0.753537	61	male	Liver	Hepatocellular carcinoma	T1N0M0	G2	1	tumor	1	37
28	-0.112973		-0.656749	-0.524852	61	male	Liver	Hepatocellular carcinoma	T1N0M0	G2	1	tumor	1	37
29	0.256554		0.364894	0.243483	61	male	Liver	Hepatic steatosis					1	37
30	0.15301		0.16449	0.0229796	61	male	Liver	Hepatic steatosis					1	37
31	0.361634		0.338024	0.310522	61	male	Liver	Hepatic steatosis					1	37
32	0.310011		0.17784	0.150463	61	male	Liver	Hepatic steatosis					1	37
33	-0.505288		-0.438349	-0.208254	42	male	Liver	Hepatocellular carcinoma	T1N0M0	G2	1	tumor	0	3
34	0.0542825		-0.129144	-0.669055	42	male	Liver	Hepatocellular carcinoma	T1N0M0	G2	1	tumor	0	3
35	0.35031		0.151061	-0.0520137	42	male	Liver	Hepatocellular carcinoma	T1N0M0	G2	1	tumor	0	3
36	0.372544		0.171476	0.0216526	42	male	Liver	Hepatocellular carcinoma	T1N0M0	G2	1	tumor	0	3
37	-0.0333466		0.251939	0.105715	42	male	Liver	Chronic hepatitis					0	3
38	0.157417		0.230125	-0.111933	42	male	Liver	Chronic hepatitis					0	3
39	0.0316662		0.134563	-0.023494	42	male	Liver	Chronic hepatitis					0	3
40	-0.159468		0.804015	0.59358	40	male	Liver	Hepatocellular carcinoma	T1N0M0	G2	1	tumor	1	52
41	0.0131875		0.780895	0.167152	40	male	Liver	Hepatocellular carcinoma	T1N0M0	G2	1	tumor	1	52
42	0.0935724		0.626355	0.320131	40	male	Liver	Hepatocellular carcinoma	T1N0M0	G2	1	tumor	1	52
43	0.395661		1.04175	0.532558	40	male	Liver	Hepatocellular carcinoma	T1N0M0	G2	1	tumor	1	52
44	0.136612		0.287485	-0.233127	40	male	Liver	Chronic hepatitis					1	52
45	0.162381		0.371042	0.0193701	40	male	Liver	Chronic hepatitis					1	52
46	0.183422		0.404072	0.163099	40	male	Liver	Chronic hepatitis					1	52
47	0.221704		0.325977	0.0836607	40	male	Liver	Chronic hepatitis					1	52
48	-0.109489		0.345922	-0.0948866	62	male	Liver	Hepatocellular carcinoma	T2N0M0	G1	2	tumor	1	52
49	0.0144965		0.370011	-0.150562	62	male	Liver	Hepatocellular carcinoma	T2N0M0	G1	2	tumor	1	52
50	-0.526371		0.151635	0.246046	62	male	Liver	Hepatocellular carcinoma	T2N0M0	G1	2	tumor	1	52
51	-0.564302		0.110291	0.307918	62	male	Liver	Hepatocellular carcinoma	T2N0M0	G1	2	tumor	1	52
52	-0.116759		0.371453	0.0664939	62	male	Liver	Chronic hepatitis					1	52
53	-0.101912		0.347699	0.134573	62	male	Liver	Chronic hepatitis					1	52
54	-0.200506		0.434864	0.190699	62	male	Liver	Chronic hepatitis					1	52
55	-0.0964711		0.640781	0.407153	62	male	Liver	Chronic hepatitis					1	52
56	-0.135664		-0.133578	-0.455325	53	male	Liver	Hepatocellular carcinoma	T2N0M0	G1	2	tumor	0	4
57	-0.225143		-0.311947	-0.63398	53	male	Liver	Hepatocellular carcinoma	T2N0M0	G1	2	tumor	0	4
58	-0.16466		-0.276797	-0.205624	53	male	Liver	Hepatocellular carcinoma	T2N0M0	G1	2	tumor	0	4
59	-0.114828		-0.21343	-0.595222	53	male	Liver	Hepatocellular carcinoma	T2N0M0	G1	2	tumor	0	4
60	-0.282209		-0.665226	-0.920077	53	male	Liver	Chronic hepatitis					0	4
61	-1.45649		-1.46762	-0.815718	53	male	Liver	Chronic hepatitis					0	4
62	-0.229754		-0.620796	-0.832948	53	male	Liver	Chronic hepatitis					0	4
63	-0.278406		-0.564169	-0.6821	53	male	Liver	Chronic hepatitis					0	4
64	-0.287251		-0.266102	-0.355464	56	male	Liver	Hepatocellular carcinoma	T2N0M0	G1	2	tumor	0	14
65	-0.35203		-0.327127	-0.511009	56	male	Liver	Hepatocellular carcinoma	T2N0M0	G1	2	tumor	0	14
66	-0.0958728		-0.0666347	-0.234716	56	male	Liver	Hepatocellular carcinoma	T2N0M0	G1	2	tumor	0	14
67	-0.270241		-0.201783	-0.12731	56	male	Liver	Hepatocellular carcinoma	T2N0M0	G1	2	tumor	0	14
68	-0.481764		-0.783788	-1.227	56	male	Liver	Hepatic steatosis					0	14
69	-0.467638		-0.566764	-0.59072	56	male	Liver	Hepatic steatosis					0	14
70	0.217954		-0.415819	-0.326384	48	male	Liver	Hepatocellular carcinoma	T2N0M0	G1	2	tumor	1	32
71	0.189731		-0.530367	-0.42719	48	male	Liver	Hepatocellular carcinoma	T2N0M0	G1	2	tumor	1	32
72	0.335448		-0.723868	-0.729168	48	male	Liver	Hepatocellular carcinoma	T2N0M0	G1	2	tumor	1	32
73	0.31898		-0.67655	-0.652365	48	male	Liver	Hepatocellular carcinoma	T2N0M0	G1	2	tumor	1	32
74	0.13435		0.111073	0.0474151	48	male	Liver	Chronic hepatitis					1	32
75	-0.0447308		0.177149	0.628428	48	male	Liver	Chronic hepatitis					1	32
76	0.0696681		0.248459	0.543942	48	male	Liver	Chronic hepatitis					1	32
77	-0.111071		0.0699703	0.47032	48	male	Liver	Chronic hepatitis					1	32
78	0.0581883		0.0152075	-0.0851847	67	male	Liver	Hepatocellular carcinoma	T2N0M0	G2	2	tumor	1	54
79	-0.00337089		-0.204859	-0.188232	67	male	Liver	Hepatocellular carcinoma	T2N0M0	G2	2	tumor	1	54
80	-0.0852379		-0.299592	-0.437241	67	male	Liver	Hepatocellular carcinoma	T2N0M0	G2	2	tumor	1	54
81	-0.12931		-0.13751	0.156702	67	male	Liver	Hepatocellular carcinoma	T2N0M0	G2	2	tumor	1	54
82	-0.0271731		0.0503808	0.273737	67	male	Liver	Chronic hepatitis					1	54
83	0.0634261		0.0937892	0.0278993	67	male	Liver	Chronic hepatitis					1	54
84	0.0634261		0.0937892	0.0278993	67	male	Liver	Chronic hepatitis					1	54
85	0.239217		0.0600022	-0.349746	67	male	Liver	Chronic hepatitis					1	54
86	0.12075		-0.266614	-0.835611	55	male	Liver	Hepatocellular carcinoma	T2N0M0	G1.5	2	tumor	0	49
87	0.148897		-0.259589	-0.709276	55	male	Liver	Hepatocellular carcinoma	T2N0M0	G1.5	2	tumor	0	49
88	0.385311		0.195204	0.0918664	55	male	Liver	Hepatocellular carcinoma	T2N0M0	G1.5	2	tumor	0	49
89	0.360548		0.0448211	-0.306653	55	male	Liver	Hepatocellular carcinoma	T2N0M0	G1.5	2	tumor	0	49
90	-0.163377		0.12621	-0.133965	55	male	Liver	Chronic hepatitis					0	49
91	-0.107085		0.0610621	-0.333117	55	male	Liver	Chronic hepatitis					0	49
92	0.0958553		0.33825	0.232383	55	male	Liver	Chronic hepatitis					0	49
93	0.100602		0.176034	-0.133245	55	male	Liver	Chronic hepatitis					0	49
94	-0.687108		-0.610857	-0.564882	65	male	Liver	Hepatocellular carcinoma	T2N0M0	G2	2	tumor	0	11
95	-0.647495		-0.761214	-0.6868	65	male	Liver	Hepatocellular carcinoma	T2N0M0	G2	2	tumor	0	11
96	-0.492112		-0.709145	-0.955035	65	male	Liver	Hepatocellular carcinoma	T2N0M0	G2	2	tumor	0	11
97	-0.616953		-0.529577	-0.544651	65	male	Liver	Hepatocellular carcinoma	T2N0M0	G2	2	tumor	0	11
98	-0.434723		-0.287146	-0.327353	65	male	Liver	Chronic hepatitis					0	11
99	-0.321111		-0.136649	-0.13019	65	male	Liver	Chronic hepatitis					0	11
100	-0.592262		-0.330042	0.169105	65	male	Liver	Chronic hepatitis					0	11
101	-0.535055		-0.333738	0.15727	65	male	Liver	Chronic hepatitis					0	11
102	-0.58452		-0.903091	-1.62841	71	male	Liver	Hepatocellular carcinoma	T2N0M0	G2	2	tumor	0	14
103	-0.265026		-0.269732	-0.863521	71	male	Liver	Hepatocellular carcinoma	T2N0M0	G2	2	tumor	0	14
104	-0.277567		-0.20524	-0.76793	71	male	Liver	Hepatocellular carcinoma	T2N0M0	G2	2	tumor	0	14
105	-0.402423		-0.649937	-1.38259	71	male	Liver	Hepatocellular carcinoma	T2N0M0	G2	2	tumor	0	14
106	0.428101		0.673989	0.125204	71	male	Liver	Chronic hepatitis					0	14
107	0.519245		0.655777	-0.000222423	71	male	Liver	Chronic hepatitis					0	14
108	0.611041		0.776547	0.471978	71	male	Liver	Chronic hepatitis					0	14
109	0.431501		0.369178	-0.292353	71	male	Liver	Chronic hepatitis					0	14
110	-0.132576		-0.421296	-0.771237	56	male	Liver	Hepatocellular carcinoma	T2N0M0	G2	2	tumor	1	49
111	-0.468388		-0.653136	-0.536769	56	male	Liver	Hepatocellular carcinoma	T2N0M0	G2	2	tumor	1	49
112	-0.312286		-0.505021	-0.42966	56	male	Liver	Hepatocellular carcinoma	T2N0M0	G2	2	tumor	1	49
113	-0.307597		-0.377828	-0.35588	56	male	Liver	Hepatocellular carcinoma	T2N0M0	G2	2	tumor	1	49
114	0.0300567		0.109746	0.0983875	56	male	Liver	Cirrhosis					1	49
115	0.0116419		0.159226	0.0866216	56	male	Liver	Cirrhosis					1	49
116	-0.527816		-0.253276	0.281185	56	male	Liver	Cirrhosis					1	49
117	-0.690029		-0.492988	0.0129564	56	male	Liver	Cirrhosis					1	49
118	-0.507319		0.0399683	0.356255	54	female1	Liver	Hepatocellular carcinoma	T2N0M0	G2	2	tumor	1	49
119	-0.0781528		0.142677	0.197221	54	female1	Liver	Hepatocellular carcinoma	T2N0M0	G2	2	tumor	1	49
120	-0.44971		-0.218526	0.169359	54	female1	Liver	Hepatocellular carcinoma	T2N0M0	G2	2	tumor	1	49
121	-0.631143		-0.456304	0.090102	54	female1	Liver	Hepatocellular carcinoma	T2N0M0	G2	2	tumor	1	49
122	-0.789936		-0.272723	0.0105711	54	female1	Liver	Cirrhosis					1	49
123	-0.724262		-0.166667	-0.0355502	54	female1	Liver	Cirrhosis					1	49
124	-1.83466		-1.29584	-0.849188	54	female1	Liver	Cirrhosis					1	49
125	-0.623057		-0.0348255	-0.0781005	54	female1	Liver	Cirrhosis					1	49
126	-0.215587		-0.285893	-0.211343	58	female1	Liver	Hepatocellular carcinoma	T2N0M0	G2	2	tumor	1	47
127	0.186274		-0.0809172	-0.32809	58	female1	Liver	Hepatocellular carcinoma	T2N0M0	G2	2	tumor	1	47
128	-0.092415		-0.26083	-0.216741	58	female1	Liver	Hepatocellular carcinoma	T2N0M0	G2	2	tumor	1	47
129	-0.245513		-0.350379	-0.180221	58	female1	Liver	Hepatocellular carcinoma	T2N0M0	G2	2	tumor	1	47
130	0.35903		0.466556	0.22317	58	female1	Liver	Normal liver tissue					1	47
131	0.393385		0.4164	0.0456849	58	female1	Liver	Normal liver tissue					1	47
132	0.407676		0.351254	-0.043002	58	female1	Liver	Normal liver tissue					1	47
133	0.358304		0.295611	-0.114657	58	female1	Liver	Normal liver tissue					1	47
134	0.18777		-0.445867	-0.846605	50	male	Liver	Hepatocellular carcinoma	T2N0M0	G2	2	tumor	1	48
135	0.334864		-0.307719	-0.671859	50	male	Liver	Hepatocellular carcinoma	T2N0M0	G2	2	tumor	1	48
136	0.401798		-0.0511233	-0.0597496	50	male	Liver	Hepatocellular carcinoma	T2N0M0	G2	2	tumor	1	48
137	0.420485		0.0421021	-0.0895987	50	male	Liver	Hepatocellular carcinoma	T2N0M0	G2	2	tumor	1	48
138	0.268664		0.305636	-0.240784	50	male	Liver	Chronic hepatitis					1	48
139	0.345342		0.603985	0.307302	50	male	Liver	Chronic hepatitis					1	48
140	0.221887		0.542052	0.578826	50	male	Liver	Chronic hepatitis					1	48
141	0.111123		0.402903	0.619258	50	male	Liver	Chronic hepatitis					1	48
142	-0.386162		-0.0174494	0.229026	52	male	Liver	Hepatocellular carcinoma	T2N0M0	G2	2	tumor	1	47
143	-0.290174		0.0958838	0.254436	52	male	Liver	Hepatocellular carcinoma	T2N0M0	G2	2	tumor	1	47
144	0.00361916		0.325594	0.218705	52	male	Liver	Hepatocellular carcinoma	T2N0M0	G2	2	tumor	1	47
145	0.051865		0.278449	0.172499	52	male	Liver	Hepatocellular carcinoma	T2N0M0	G2	2	tumor	1	47
146	-0.353143		0.177323	0.121622	52	male	Liver	Cirrhosis					1	47
147	-0.630183		0.0664727	0.248715	52	male	Liver	Cirrhosis					1	47
148	-0.168837		0.326091	0.0137282	52	male	Liver	Cirrhosis					1	47
149	-0.167522		0.330193	0.0172814	52	male	Liver	Cirrhosis					1	47
150	-0.39352		-0.447627	-0.968903	52	male	Liver	Hepatocellular carcinoma	T2N0M0	G2	2	tumor	0	35
151	-0.413432		-0.697421	-1.34207	52	male	Liver	Hepatocellular carcinoma	T2N0M0	G2	2	tumor	0	35
152	-0.0564404		0.267046	-0.165245	52	male	Liver	Hepatocellular carcinoma	T2N0M0	G2	2	tumor	0	35
153	-0.222057		0.164603	-0.0109759	52	male	Liver	Hepatocellular carcinoma	T2N0M0	G2	2	tumor	0	35
154	-0.591006		0.116444	-0.157271	52	male	Liver	Chronic hepatitis					0	35
155	-0.492663		0.288264	-0.369886	52	male	Liver	Chronic hepatitis					0	35
156	-0.974855		0.235324	-0.0147069	52	male	Liver	Chronic hepatitis					0	35
157	-1.11367		-0.117009	0.0328765	52	male	Liver	Chronic hepatitis					0	35
158	0.741395		0.521053	0.195892	47	male	Liver	Hepatocellular carcinoma	T2N0M0	G1.5	2	tumor	1	42
159	0.837051		0.727402	0.524181	47	male	Liver	Hepatocellular carcinoma	T2N0M0	G1.5	2	tumor	1	42
160	0.834959		0.392663	-0.0545124	47	male	Liver	Hepatocellular carcinoma	T2N0M0	G1.5	2	tumor	1	42
161	0.616975		0.488731	0.267637	47	male	Liver	Hepatocellular carcinoma	T2N0M0	G1.5	2	tumor	1	42
162	0.307235		-0.277283	-0.107834	47	male	Liver	Chronic hepatitis					1	42
163	0.35741		0.0366716	0.101165	47	male	Liver	Chronic hepatitis					1	42
164	-0.425452		-0.422501	-0.0253517	47	male	Liver	Chronic hepatitis					1	42
165	0.144432		-0.0486753	0.330023	47	male	Liver	Chronic hepatitis					1	42
166	-0.0158027		-0.528192	-0.848866	48	female1	Liver	Hepatocellular carcinoma	T2N0M0	G2	2	tumor	0	25
167	-0.0558355		-0.511349	-0.719443	48	female1	Liver	Hepatocellular carcinoma	T2N0M0	G2	2	tumor	0	25
168	-0.540713		-0.752847	-0.566729	48	female1	Liver	Hepatocellular carcinoma	T2N0M0	G2	2	tumor	0	25
169	-1.01809		-1.33079	-0.786182	48	female1	Liver	Hepatocellular carcinoma	T2N0M0	G2	2	tumor	0	25
170	-0.0642723		0.0647288	0.0605442	48	female1	Liver	Cirrhosis					0	25
171	-0.338619		-0.0580286	0.0406648	48	female1	Liver	Cirrhosis					0	25
172	-0.140168		0.11571	0.205955	48	female1	Liver	Cirrhosis					0	25
173	-0.205204		0.0226451	0.309196	48	female1	Liver	Cirrhosis					0	25
174	0.0808395		0.63005	-0.0254365	52	male	Liver	Hepatocellular carcinoma	T2N0M0	G1.5	2	tumor	1	41
175	0.0237		0.941801	0.480291	52	male	Liver	Hepatocellular carcinoma	T2N0M0	G1.5	2	tumor	1	41
176	-0.0578485		1.26142	0.864683	52	male	Liver	Hepatocellular carcinoma	T2N0M0	G1.5	2	tumor	1	41
177	-0.163941		1.03539	0.886708	52	male	Liver	Hepatocellular carcinoma	T2N0M0	G1.5	2	tumor	1	41
178	-0.838326		-0.27715	-0.138685	52	male	Liver	Chronic hepatitis					1	41
179	-0.115591		0.369906	0.399011	52	male	Liver	Chronic hepatitis					1	41
180	-0.493556		0.0719508	0.0391907	52	male	Liver	Chronic hepatitis					1	41
181	-0.673502		0.330102	0.363788	54	male	Liver	Hepatocellular carcinoma	T2N0M0	G1.5	2	tumor	0	17
182	-0.628193		0.421845	0.437006	54	male	Liver	Hepatocellular carcinoma	T2N0M0	G2	2	tumor	0	17
183	-0.413847		0.767569	0.475761	54	male	Liver	Hepatocellular carcinoma	T2N0M0	G2	2	tumor	0	17
184	-0.927817		0.373493	0.316196	54	male	Liver	Hepatocellular carcinoma	T2N0M0	G2	2	tumor	0	17
185	-0.397356		0.151784	0.31668	54	male	Liver	Chronic hepatitis					0	17
186	0.064805		0.388677	0.150374	54	male	Liver	Chronic hepatitis					0	17
187	-0.127417		0.668339	0.602767	54	male	Liver	Chronic hepatitis					0	17
188	-1.10298		-0.20133	0.0997661	54	male	Liver	Chronic hepatitis					0	17
189	-0.225831		0.0704335	-0.691547	57	male	Liver	Hepatocellular carcinoma	T2N0M0	G2	2	tumor	0	11
190	-0.489048		0.058732	-0.564386	57	male	Liver	Hepatocellular carcinoma	T2N0M0	G2	2	tumor	0	11
191	-0.5666		-0.396574	0.0731911	57	male	Liver	Chronic hepatitis					0	11
192	-0.134605		-0.0118393	0.0483616	57	male	Liver	Chronic hepatitis					0	11
193	-0.178171		-0.234249	-0.340373	57	male	Liver	Chronic hepatitis					0	11
194	-0.12193		-0.0726184	-0.025714	57	male	Liver	Chronic hepatitis					0	11
195	0.155383		-0.066744	-0.138569	43	male	Liver	Hepatocellular carcinoma	T2N0M0	G2	2	tumor	0	4
196	0.220266		0.130138	0.172516	43	male	Liver	Hepatocellular carcinoma	T2N0M0	G2	2	tumor	0	4
197	-0.638544		-0.462623	-0.196924	43	male	Liver	Hepatocellular carcinoma	T2N0M0	G2	2	tumor	0	4
198	-0.0815451		-0.061145	0.189307	43	male	Liver	Hepatocellular carcinoma	T2N0M0	G2	2	tumor	0	4
199	-0.233464		0.21008	-0.198341	43	male	Liver	Chronic hepatitis					0	4
200	0.126772		0.342368	0.427642	43	male	Liver	Chronic hepatitis					0	4
201	-0.194129		-0.144242	-0.389799	43	male	Liver	Chronic hepatitis					0	4
202	0.130355		-0.0785599	0.528601	54	male	Liver	Hepatocellular carcinoma	T2N0M0	G2	2	tumor	1	32
203	0.142455		-0.0340583	0.117721	54	male	Liver	Hepatocellular carcinoma	T2N0M0	G2	2	tumor	1	32
204	0.0944786		0.00911754	0.373532	54	male	Liver	Hepatocellular carcinoma	T2N0M0	G2	2	tumor	1	32
205	0.430173		0.510473	1.26689	54	male	Liver	Hepatocellular carcinoma	T2N0M0	G2	2	tumor	1	32
206	-0.55891		-0.215951	2.2525e-05	54	male	Liver	Chronic hepatitis					1	32
207	0.149983		0.349423	0.163432	54	male	Liver	Chronic hepatitis					1	32
208	0.287107		0.248289	-0.142409	54	male	Liver	Chronic hepatitis					1	32
209	-0.135146		0.0092519	-0.17704	54	male	Liver	Chronic hepatitis					1	32
210	-0.0475541		-0.115093	-0.397903	60	male	Liver	Hepatocellular carcinoma	T2N0M0	G2.5	2	tumor	1	54
211	-0.362176		-0.00627907	-0.34824	60	male	Liver	Hepatocellular carcinoma	T2N0M0	G2.5	2	tumor	1	54
212	-0.451547		-0.0596124	-0.323791	60	male	Liver	Hepatocellular carcinoma	T2N0M0	G2.5	2	tumor	1	54
213	-0.582575		-0.173585	-0.648636	60	male	Liver	Hepatocellular carcinoma	T2N0M0	G2.5	2	tumor	1	54
214	-0.344271		0.0175979	-0.0982161	60	male	Liver	Chronic hepatitis					1	54
215	-0.499042		-0.161292	-0.0194488	60	male	Liver	Chronic hepatitis					1	54
216	-0.125358		0.0663322	-0.129837	60	male	Liver	Chronic hepatitis					1	54
217	-0.362061		0.0610327	0.240146	60	male	Liver	Chronic hepatitis					1	54
218	0.0638225		-0.233977	-0.0984245	58	male	Liver	Hepatocellular carcinoma	T2N0M0	G2.5	2	tumor	1	53
219	0.101719		-0.240272	-0.305044	58	male	Liver	Hepatocellular carcinoma	T2N0M0	G2.5	2	tumor	1	53
220	-0.143378		-0.20362	-0.042827	58	male	Liver	Hepatocellular carcinoma	T2N0M0	G2.5	2	tumor	1	53
221	0.0120987		-0.256918	-0.133081	58	male	Liver	Hepatocellular carcinoma	T2N0M0	G2.5	2	tumor	1	53
222	-0.499942		-0.140182	0.222263	58	male	Liver	Chronic hepatitis					1	53
223	-0.707259		-0.0279987	-0.233113	58	male	Liver	Chronic hepatitis					1	53
224	-0.818258		-0.000571106	-0.0578931	58	male	Liver	Chronic hepatitis					1	53
225	-0.645127		-0.0125563	-0.018073	58	male	Liver	Chronic hepatitis					1	53
226	-0.608136		-0.501229	-0.385184	57	male	Liver	Hepatocellular carcinoma	T2N0M0	G2	2	tumor	0	43
227	-0.620333		-0.465505	-0.203404	57	male	Liver	Hepatocellular carcinoma	T2N0M0	G2	2	tumor	0	43
228	-0.259252		-0.0164283	-0.318526	57	male	Liver	Hepatocellular carcinoma	T2N0M0	G2	2	tumor	0	43
229	-0.202169		0.0677858	-0.28244	57	male	Liver	Hepatocellular carcinoma	T2N0M0	G2	2	tumor	0	43
230	-0.0690109		-0.0170062	-0.00662636	57	male	Liver	Chronic hepatitis					0	43
231	-0.651347		-0.331476	0.0434002	57	male	Liver	Chronic hepatitis					0	43
232	-1.04016		-0.594308	-0.0385927	57	male	Liver	Chronic hepatitis					0	43
233	-0.369834		-0.223341	0.208457	57	male	Liver	Chronic hepatitis					0	43
234	0.128261		-0.273958	-0.267002	51	male	Liver	Hepatocellular carcinoma	T2N0M0	G2	2	tumor	0	29
235	0.0267653		-0.339494	-0.313102	51	male	Liver	Hepatocellular carcinoma	T2N0M0	G2	2	tumor	0	29
236	-0.129986		-0.133693	0.00863347	51	male	Liver	Hepatocellular carcinoma	T2N0M0	G2	2	tumor	0	29
237	-0.351794		-0.0945145	0.415227	51	male	Liver	Hepatocellular carcinoma	T2N0M0	G2	2	tumor	0	29
238	-0.0953264		0.132806	0.526861	51	male	Liver	Hepatic steatosis					0	29
239	0.134209		0.239201	0.481888	51	male	Liver	Hepatic steatosis					0	29
240	0.195582		0.424891	0.568579	51	male	Liver	Hepatic steatosis					0	29
241	0.242996		0.076308	-0.270647	51	male	Liver	Hepatic steatosis					0	29
242	-0.0865641		0.444595	0.415353	57	male	Liver	Chronic hepatitis	T2N0M0	G0	2	tumor	0	2
243	-0.174323		0.295873	0.112678	57	male	Liver	Chronic hepatitis	T2N0M0	G0	2	tumor	0	2
244	-0.00538652		0.560918	0.533059	57	male	Liver	Chronic hepatitis	T2N0M0	G0	2	tumor	0	2
245	-0.043783		0.496767	0.812002	57	male	Liver	Chronic hepatitis	T2N0M0	G0	2	tumor	0	2
246	-0.378336		0.156638	0.0786389	57	male	Liver	Hepatic steatosis					1	48
247	-0.179584		0.238168	0.0334883	57	male	Liver	Hepatic steatosis					1	48
248	-0.192156		0.459156	0.154319	57	male	Liver	Hepatic steatosis					1	48
249	-0.131236		0.428473	0.296727	57	male	Liver	Hepatic steatosis					1	48
250	-0.614568		-0.400368	-0.117673	61	male	Liver	Hepatocellular carcinoma	T2N0M0	G0	2	tumor	1	31
251	-0.0705076		0.233742	0.0217621	61	male	Liver	Hepatocellular carcinoma	T2N0M0	G0	2	tumor	1	31
252	-0.0402357		0.136258	0.249702	61	male	Liver	Hepatocellular carcinoma	T2N0M0	G0	2	tumor	1	31
253	0.101806		0.238571	0.232635	61	male	Liver	Hepatocellular carcinoma	T2N0M0	G0	2	tumor	1	31
254	-0.276391		0.159389	-0.407857	61	male	Liver	Chronic hepatitis					1	31
255	-0.174999		0.238736	-0.0876083	61	male	Liver	Chronic hepatitis					1	31
256	-0.193907		0.165974	-0.00676121	61	male	Liver	Chronic hepatitis					1	31
257	-0.576274		-0.231196	-0.428196	46	male	Liver	Hepatocellular carcinoma	T2N0M0	G3	2	tumor	0	16
258	-0.449805		-0.247008	-0.362602	46	male	Liver	Hepatocellular carcinoma	T2N0M0	G3	2	tumor	0	16
259	-0.760341		-0.0257729	-0.0897524	46	male	Liver	Hepatocellular carcinoma	T2N0M0	G3	2	tumor	0	16
260	-0.817126		-0.190242	-0.268057	46	male	Liver	Hepatocellular carcinoma	T2N0M0	G3	2	tumor	0	16
261	-0.427417		-0.0134662	-0.147938	46	male	Liver	Cirrhosis					0	16
262	-0.19661		0.0108869	-0.314192	46	male	Liver	Cirrhosis					0	16
263	-0.317477		-0.00965782	0.0421835	46	male	Liver	Cirrhosis					0	16
264	-0.292454		0.103304	-0.00545994	46	male	Liver	Cirrhosis					0	16
265	-0.0415164		-0.336815	0.149536	52	male	Liver	Hepatocellular carcinoma	T2N0M0	G3	2	tumor	0	16
266	0.16711		-0.109443	0.136394	52	male	Liver	Hepatocellular carcinoma	T2N0M0	G3	2	tumor	0	16
267	-1.12538		-1.12797	-0.0220107	52	male	Liver	Hepatocellular carcinoma	T2N0M0	G3	2	tumor	0	16
268	-0.330588		-0.492469	0.376116	52	male	Liver	Hepatocellular carcinoma	T2N0M0	G3	2	tumor	0	16
269	-0.0319968		-0.100775	0.0990926	52	male	Liver	Chronic hepatitis					0	16
270	-0.0406932		-0.0439727	-0.0401268	52	male	Liver	Chronic hepatitis					0	16
271	-0.0628197		-0.156978	-0.18422	52	male	Liver	Chronic hepatitis					0	16
272	-0.309469		-0.25702	0.218954	52	male	Liver	Chronic hepatitis					0	16
273	-0.369622		-0.460281	-0.37693	56	male	Liver	Hepatocellular carcinoma	T2N0M0	G3	2	tumor	0	6
274	-0.468777		-0.566212	-0.269003	56	male	Liver	Hepatocellular carcinoma	T2N0M0	G3	2	tumor	0	6
275	-0.435988		-0.541492	-0.262465	56	male	Liver	Hepatocellular carcinoma	T2N0M0	G3	2	tumor	0	6
276	-0.422851		-0.482688	-0.389191	56	male	Liver	Hepatocellular carcinoma	T2N0M0	G3	2	tumor	0	6
277	0.15776		0.308828	0.18868	56	male	Liver	Chronic hepatitis					0	6
278	0.451535		0.497367	0.363682	56	male	Liver	Chronic hepatitis					0	6
279	0.266159		0.262348	0.170509	56	male	Liver	Chronic hepatitis					0	6
280	0.332317		0.303568	0.261621	56	male	Liver	Chronic hepatitis					0	6
281	0.477889		-0.213184	0.0925476	72	female1	Liver	Hepatocellular carcinoma	T2N0M0	G3	2	tumor	0	4
282	0.126791		-0.498441	0.300162	72	female1	Liver	Hepatocellular carcinoma	T2N0M0	G3	2	tumor	0	4
283	0.605546		-0.135691	0.141309	72	female1	Liver	Hepatocellular carcinoma	T2N0M0	G3	2	tumor	0	4
284	0.52508		-0.0983206	0.116962	72	female1	Liver	Hepatocellular carcinoma	T2N0M0	G3	2	tumor	0	4
285	0.216101		0.243404	0.484806	72	female1	Liver	Liver cell degeneration					0	4
286	0.282526		0.27105	0.228574	72	female1	Liver	Liver cell degeneration					0	4
287	0.0657515		-0.0553919	-0.25492	72	female1	Liver	Liver cell degeneration					0	4
288	0.105466		0.19553	0.249771	72	female1	Liver	Liver cell degeneration					0	4
289	-0.257091		-0.198418	0.0150775	68	male	Liver	Hepatocellular carcinoma	T2N0M0	G3	2	tumor	0	0
290	0.317798		-0.0680788	-0.0684328	68	male	Liver	Hepatocellular carcinoma	T2N0M0	G3	2	tumor	0	0
291	0.229287		0.281044	0.240428	68	male	Liver	Hepatocellular carcinoma	T2N0M0	G3	2	tumor	0	0
292	0.236849		0.129842	0.180066	68	male	Liver	Hepatocellular carcinoma	T2N0M0	G3	2	tumor	0	0
293	0.38857		0.28846	0.271408	68	male	Liver	Chronic hepatitis					0	0
294	0.447066		0.392217	0.525987	68	male	Liver	Chronic hepatitis					0	0
295	0.113566		0.235341	0.549849	68	male	Liver	Chronic hepatitis					0	0
296	0.189284		0.346749	0.646135	68	male	Liver	Chronic hepatitis					0	0
297	-0.144541		-0.0723252	-0.299828	43	male	Liver	Chronic hepatitis					1	60
298	-0.0478483		-0.114174	-0.38499	43	male	Liver	Chronic hepatitis					1	60
299	-0.110578		-0.249794	-0.548294	43	male	Liver	Chronic hepatitis					1	60
300	-0.19358		-0.123622	-0.178382	43	male	Liver	Chronic hepatitis					1	60
301	-0.339696		-0.666648	-0.450034	47	male	Liver	Hepatocellular carcinoma	T3N0M0	G2	3	tumor	1	59
302	0.00984797		-0.533176	-0.638815	47	male	Liver	Hepatocellular carcinoma	T3N0M0	G2	3	tumor	1	59
303	-0.548586		-0.783201	-0.37127	47	male	Liver	Hepatocellular carcinoma	T3N0M0	G2	3	tumor	1	59
304	-0.0350813		-0.347663	-0.263462	47	male	Liver	Hepatocellular carcinoma	T3N0M0	G2	3	tumor	1	59
305	-0.0406641		0.140774	0.255612	47	male	Liver	Chronic hepatitis					1	59
306	0.142952		0.302908	0.312217	47	male	Liver	Chronic hepatitis					1	59
307	0.0477014		0.298779	0.430321	47	male	Liver	Chronic hepatitis					1	59
308	0.0606679		0.209296	0.190695	47	male	Liver	Chronic hepatitis					1	59
309	0.207329		-0.00123061	-0.0415948	58	male	Liver	Hepatocellular carcinoma	T3N0M0	G2	3	tumor	1	52
310	0.336502		0.116009	-0.0919029	58	male	Liver	Hepatocellular carcinoma	T3N0M0	G2	3	tumor	1	52
311	-0.112463		0.106482	-0.293517	58	male	Liver	Hepatocellular carcinoma	T3N0M0	G2	3	tumor	1	52
312	-0.0820447		0.0799347	-0.283547	58	male	Liver	Hepatocellular carcinoma	T3N0M0	G2	3	tumor	1	52
313	-0.0120247		0.067399	0.0669312	58	male	Liver	Normal liver tissue					1	52
314	-0.0250975		0.0655103	-0.068728	58	male	Liver	Normal liver tissue					1	52
315	-0.253017		-0.0162436	0.101005	58	male	Liver	Normal liver tissue					1	52
316	-0.0917682		-0.130736	-0.0737375	58	male	Liver	Normal liver tissue					1	52
317	-1.01428		-1.22314	-0.871649	56	male	Liver	Hepatocellular carcinoma	T3N0M0	G3	3	tumor	0	4
318	-0.618445		-0.92773	-1.08339	56	male	Liver	Hepatocellular carcinoma	T3N0M0	G3	3	tumor	0	4
319	-0.421175		-0.416926	-0.251658	56	male	Liver	Chronic hepatitis					0	4
320	-0.373489		-0.348201	-0.127742	56	male	Liver	Chronic hepatitis					0	4
321	-0.233812		-0.345312	-0.663332	56	male	Liver	Chronic hepatitis					0	4
322	-0.2219		-0.25683	-0.0605202	56	male	Liver	Chronic hepatitis					0	4
323	0.599248		-0.185104	0.00145488	57	male	Liver	Hepatocellular carcinoma	T3N0M0	G3	3	tumor	0	29
324	0.686252		-0.0441965	0.248843	57	male	Liver	Hepatocellular carcinoma	T3N0M0	G3	3	tumor	0	29
325	0.624868		-0.131683	0.170779	57	male	Liver	Hepatocellular carcinoma	T3N0M0	G3	3	tumor	0	29
326	0.340927		-0.455746	-0.251657	57	male	Liver	Hepatocellular carcinoma	T3N0M0	G3	3	tumor	0	29
327	0.190711		0.152009	0.422276	57	male	Liver	Chronic hepatitis					0	29
328	0.34157		0.26683	0.555852	57	male	Liver	Chronic hepatitis					0	29
329	0.531725		0.309193	0.412491	57	male	Liver	Chronic hepatitis					0	29
330	0.273134		0.0481416	0.184711	57	male	Liver	Chronic hepatitis					0	29
331	-0.064629		-0.345333	-0.535073	70	male	Liver	Hepatocellular carcinoma	T2N1M0	G2	3	tumor	0	13
332	-0.0830088		-0.439818	-0.649815	70	male	Liver	Hepatocellular carcinoma	T2N1M0	G2	3	tumor	0	13
333	-0.279419		-0.41469	-0.114613	70	male	Liver	Hepatocellular carcinoma	T2N1M0	G2	3	tumor	0	13
334	0.199831		-0.202211	-0.0995557	70	male	Liver	Hepatocellular carcinoma	T2N1M0	G2	3	tumor	0	13
335	0.34082		0.0441343	-0.119259	70	male	Liver	Chronic hepatitis					0	13
336	0.391347		0.253086	0.504388	70	male	Liver	Chronic hepatitis					0	13
337	0.449858		0.335572	0.431513	70	male	Liver	Chronic hepatitis					0	13
338	0.280131		0.129615	0.478009	70	male	Liver	Chronic hepatitis					0	13
339	0.0572445		0.130185	0.359804	49	male	Liver	Hepatocellular carcinoma	T4N0M0	G2	4	tumor	0	11
340	-0.0426208		0.200709	0.199561	49	male	Liver	Hepatocellular carcinoma	T4N0M0	G2	4	tumor	0	11
341	-0.10328		0.15167	0.0974181	49	male	Liver	Hepatocellular carcinoma	T4N0M0	G2	4	tumor	0	11
342	-0.169153		0.044082	-0.0828919	49	male	Liver	Hepatocellular carcinoma	T4N0M0	G2	4	tumor	0	11
343	0.335659		0.444566	0.687177	49	male	Liver	Inflammation of portal area					0	11
344	0.434254		0.462906	0.681628	49	male	Liver	Inflammation of portal area					0	11
345	0.1377		0.150816	0.666534	49	male	Liver	Inflammation of portal area					0	11
346	0.41648		0.11267	0.127315	49	male	Liver	Inflammation of portal area					0	11
347	-0.237496		-0.48808	-0.755195	48	male	Liver	Hepatocellular carcinoma	T4N0M0	G2	4	tumor	0	8
348	-0.0808184		-0.623071	-0.781167	48	male	Liver	Hepatocellular carcinoma	T4N0M0	G2	4	tumor	0	8
349	-0.158736		-0.449602	-0.74267	48	male	Liver	Hepatocellular carcinoma	T4N0M0	G2	4	tumor	0	8
350	-0.308607		-0.397199	-0.560028	48	male	Liver	Hepatocellular carcinoma	T4N0M0	G2	4	tumor	0	8
351	-0.0773747		-0.129291	-0.337113	48	male	Liver	Chronic hepatitis					0	8
352	-0.407194		-0.380186	-0.628533	48	male	Liver	Chronic hepatitis					0	8
353	-0.202733		-0.187928	-0.225997	48	male	Liver	Chronic hepatitis					0	8
354	-0.124056		-0.0418677	-0.134174	48	male	Liver	Chronic hepatitis					0	8
355	-0.391697		-0.733245	-0.786101	49	male	Liver	Hepatocellular carcinoma	T4N0M0	G2	4	tumor	0	4
356	-0.00130534		-0.631816	-0.987006	49	male	Liver	Hepatocellular carcinoma	T4N0M0	G2	4	tumor	0	4
357	-0.29837		-0.451158	-0.484205	49	male	Liver	Hepatocellular carcinoma	T4N0M0	G2	4	tumor	0	4
358	-0.221231		-0.538091	-0.82403	49	male	Liver	Hepatocellular carcinoma	T4N0M0	G2	4	tumor	0	4
359	-0.176226		-0.143863	0.0476671	49	male	Liver	Liver tissue degeneration					0	4
360	-0.108362		-0.37362	0.0138897	49	male	Liver	Liver tissue degeneration					0	4
361	-0.202469		0.0578808	0.417904	49	male	Liver	Liver tissue degeneration					0	4
362	-0.210024		0.0803085	0.386511	49	male	Liver	Liver tissue degeneration					0	4
363	-0.647531		-2.18522	-1.4443	51	female1	Liver	Hepatocellular carcinoma	T4N0M0	G2	4	tumor	0	22
364	-0.190493		-1.85802	-1.19417	51	female1	Liver	Hepatocellular carcinoma	T4N0M0	G2	4	tumor	0	22
365	-0.260944		-0.735242	-0.51143	51	female1	Liver	Hepatocellular carcinoma	T4N0M0	G2	4	tumor	0	22
366	-0.37086		-0.865297	-0.533112	51	female1	Liver	Hepatocellular carcinoma	T4N0M0	G2	4	tumor	0	22
367	-0.360131		-1.6416	-0.629531	51	female1	Liver	Chronic hepatitis					0	22
368	-0.321579		-1.66335	-0.821643	51	female1	Liver	Chronic hepatitis					0	22
369	-0.0401747		-0.945989	-0.451658	51	female1	Liver	Chronic hepatitis					0	22
370	-0.149466		-1.02247	-0.46001	51	female1	Liver	Chronic hepatitis					0	22
371	-0.484739		-1.11398	-1.41681	56	male	Liver	Hepatocellular carcinoma	T4N0M0	G2.5	4	tumor	0	4
372	-0.192619		-0.64171	-0.688652	56	male	Liver	Hepatocellular carcinoma	T4N0M0	G2.5	4	tumor	0	4
373	-0.143152		-0.654365	-0.853316	56	male	Liver	Hepatocellular carcinoma	T4N0M0	G2.5	4	tumor	0	4
374	-0.245712		-0.730812	-0.717345	56	male	Liver	Hepatocellular carcinoma	T4N0M0	G2.5	4	tumor	0	4
375	0.54599		0.386516	0.86994	56	male	Liver	Chronic hepatitis					0	4
376	0.497891		0.355211	1.01273	56	male	Liver	Chronic hepatitis					0	4
377	0.836804		0.724667	1.05263	56	male	Liver	Chronic hepatitis					0	4
378	0.627269		0.622737	1.13216	56	male	Liver	Chronic hepatitis					0	4
379	0.345331		1.01593	0.786911	38	male	Liver	Hepatocellular carcinoma	T2N0M1	G2	4	tumor	0	39
380	-0.0412706		-0.285249	-0.256353	38	male	Liver	Hepatocellular carcinoma	T2N0M1	G2	4	tumor	0	39
381	-0.174072		-0.230695	-0.445679	38	male	Liver	Hepatocellular carcinoma	T2N0M1	G2	4	tumor	0	39
382	-0.119321		-0.0906502	-0.373846	38	male	Liver	Hepatocellular carcinoma	T2N0M1	G2	4	tumor	0	39
383	0.264231		0.0876371	0.261143	38	male	Liver	Chronic hepatitis					0	39
384	0.461862		0.202899	0.122943	38	male	Liver	Chronic hepatitis					0	39
385	0.476302		0.248851	0.431309	38	male	Liver	Chronic hepatitis					0	39
386	0.664681		0.302371	0.22816	38	male	Liver	Chronic hepatitis					0	39
387	0.426292		0.24965	0.105684	47	male	Liver	Cirrhosis					1	41
388	0.425668		0.267443	0.24165	47	male	Liver	Cirrhosis					1	41
389	0.189212		-0.000200923	-0.0308279	47	male	Liver	Cirrhosis					1	41
390	0.299988		0.183966	0.11155	47	male	Liver	Cirrhosis					1	41
391	0.506556		0.237726	0.320506	56	male	Liver	Chronic hepatitis					0	13
392	0.311339		0.316581	0.20994	56	male	Liver	Chronic hepatitis					0	13
393	0.43564		0.303445	0.252874	56	male	Liver	Chronic hepatitis					0	13
394	0.316164		0.216985	0.277634	56	male	Liver	Chronic hepatitis					0	13
395	0.339908		-0.358073	-0.496372	56	male	Liver	Hepatocellular carcinoma	T3N0M0	G1	3	tumor	0	32
396	0.381203		-0.0852541	0.174728	56	male	Liver	Hepatocellular carcinoma	T3N0M0	G1	3	tumor	0	32
397	0.253737		-0.277767	-0.267933	56	male	Liver	Hepatocellular carcinoma	T3N0M0	G1	3	tumor	0	32
398	0.45923		-0.17651	-0.260381	56	male	Liver	Hepatocellular carcinoma	T3N0M0	G1	3	tumor	0	32
399	-0.722437	-0.824545		-0.681044	39	male	Liver	Hepatocellular carcinoma	T1N0M0	G2	1	tumor	1	49
400	-1.02688	-1.19788		-0.785307	39	male	Liver	Hepatocellular carcinoma	T1N0M0	G2	1	tumor	1	49
401	-0.575981	-1.03614		-1.1184	39	male	Liver	Hepatocellular carcinoma	T1N0M0	G2	1	tumor	1	49
402	-0.683239	-1.05338		-0.789043	39	male	Liver	Hepatocellular carcinoma	T1N0M0	G2	1	tumor	1	49
403	0.15081	-0.188693		-0.409959	39	male	Liver	Chronic hepatitis					1	49
404	-0.235792	-0.427918		-0.209419	39	male	Liver	Chronic hepatitis					1	49
405	0.40064	-0.109349		0.00837041	43	male	Liver	Hepatocellular carcinoma	T1N0M0	G2	1	tumor	1	42
406	0.608005	0.0997091		-0.0159551	43	male	Liver	Hepatocellular carcinoma	T1N0M0	G2	1	tumor	1	42
407	-0.26468	-0.128999		-0.0105861	43	male	Liver	Hepatocellular carcinoma	T1N0M0	G2	1	tumor	1	42
408	0.0847075	-0.256813		-0.373443	43		Liver	Chronic hepatitis					1	42
409	0.136626	-0.201003		-0.298819	43	male	Liver	Chronic hepatitis					1	42
410	-0.104696	-0.0849254		-0.0526084	43	male	Liver	Chronic hepatitis					1	42
411	-0.0578849	-0.134163		-0.320701	43	male	Liver	Chronic hepatitis					1	42
412	0.178682	-0.0422243		-0.0525722	55	male	Liver	Hepatocellular carcinoma	T1N0M0	G2	1	tumor	1	41
413	0.185561	-0.464806		-0.943367	55	male	Liver	Hepatocellular carcinoma	T1N0M0	G2	1	tumor	1	41
414	0.0825086	-0.395158		-0.837784	55	male	Liver	Hepatocellular carcinoma	T1N0M0	G2	1	tumor	1	41
415	-0.00131128	-0.364935		-0.501402	55	male	Liver	Hepatocellular carcinoma	T1N0M0	G2	1	tumor	1	41
416	-0.485724	-0.556328		-0.4135	55	male	Liver	Cirrhosis					1	41
417	-0.720773	-0.716546		-0.530909	55	male	Liver	Cirrhosis					1	41
418	-0.866036	-0.669293		-0.404127	55	male	Liver	Cirrhosis					1	41
419	-1.35565	-1.27763		-0.612329	55	male	Liver	Cirrhosis					1	41
420	-0.0507091	-0.757284		-1.26754	61	male	Liver	Hepatocellular carcinoma	T1N0M0	G2	1	tumor	1	37
421	-0.143003	-0.808753		-0.974108	61	male	Liver	Hepatocellular carcinoma	T1N0M0	G2	1	tumor	1	37
422	-0.0915958	-0.636332		-0.952541	61	male	Liver	Hepatocellular carcinoma	T1N0M0	G2	1	tumor	1	37
423	-0.193607	-0.62772		-0.797903	61	male	Liver	Hepatocellular carcinoma	T1N0M0	G2	1	tumor	1	37
424	0.0183329	-0.0856108		-0.0335501	61	male	Liver	Hepatic steatosis					1	37
425	-0.192764	-0.151934		-0.040785	61	male	Liver	Hepatic steatosis					1	37
426	-0.0740393	-0.0118585		0.0378962	61	male	Liver	Hepatic steatosis					1	37
427	-0.0879296	-0.0201607		0.0397919	61	male	Liver	Hepatic steatosis					1	37
428	-0.00542401	-0.425654		-0.632209	42	male	Liver	Hepatocellular carcinoma	T1N0M0	G2	1	tumor	0	3
429	-0.566289	-0.418189		-0.190555	42	male	Liver	Hepatocellular carcinoma	T1N0M0	G2	1	tumor	0	3
430	-0.22748	-0.252315		-0.520498	42	male	Liver	Hepatocellular carcinoma	T1N0M0	G2	1	tumor	0	3
431	-0.0769051	-0.295336		-0.373093	42	male	Liver	Hepatocellular carcinoma	T1N0M0	G2	1	tumor	0	3
432	-0.641821	-0.451925		-0.21625	42	male	Liver	Chronic hepatitis					0	3
433	-0.375092	-0.158636		-0.213267	42	male	Liver	Chronic hepatitis					0	3
434	-0.0261141	-0.293616		-0.358182	40	male	Liver	Hepatocellular carcinoma	T1N0M0	G2	1	tumor	1	52
435	0.0997586	-0.193986		-0.45737	40	male	Liver	Hepatocellular carcinoma	T1N0M0	G2	1	tumor	1	52
436	-0.616096	-0.721374		-0.622035	40	male	Liver	Hepatocellular carcinoma	T1N0M0	G2	1	tumor	1	52
437	-0.483813	-0.353588		-0.293457	40	male	Liver	Chronic hepatitis					1	52
438	-0.419926	-0.39831		-0.740033	40	male	Liver	Chronic hepatitis					1	52
439	-0.864525	-0.360071		-0.134651	40	male	Liver	Chronic hepatitis					1	52
440	-0.843397	-0.474367		-0.213932	40	male	Liver	Chronic hepatitis					1	52
441	-0.967248	-0.490629		-0.426761	62	male	Liver	Hepatocellular carcinoma	T2N0M0	G1	2	tumor	1	52
442	-1.12607	-0.486973		-0.363206	62	male	Liver	Hepatocellular carcinoma	T2N0M0	G1	2	tumor	1	52
443	-1.13119	-0.485052		-0.355616	62	male	Liver	Hepatocellular carcinoma	T2N0M0	G1	2	tumor	1	52
444	-0.863228	-0.385152		-0.414294	62	male	Liver	Hepatocellular carcinoma	T2N0M0	G1	2	tumor	1	52
445	-1.34738	-0.313928		-0.108211	62	male	Liver	Chronic hepatitis					1	52
446	-1.35272	-0.337747		-0.182354	62	male	Liver	Chronic hepatitis					1	52
447	-2.24774	-0.649039		-0.218628	62	male	Liver	Chronic hepatitis					1	52
448	-1.54995	-0.293318		-0.0898565	62	male	Liver	Chronic hepatitis					1	52
449	-0.112096	0.13327		-0.0704515	53	male	Liver	Hepatocellular carcinoma	T2N0M0	G1	2	tumor	0	4
450	-1.04689	-0.503711		-0.162906	53	male	Liver	Hepatocellular carcinoma	T2N0M0	G1	2	tumor	0	4
451	-0.49211	0.0399206		0.0452257	53	male	Liver	Hepatocellular carcinoma	T2N0M0	G1	2	tumor	0	4
452	-0.58661	-0.20163		-0.0376295	53	male	Liver	Hepatocellular carcinoma	T2N0M0	G1	2	tumor	0	4
453	-0.864316	-0.762691		-0.570637	53	male	Liver	Chronic hepatitis					0	4
454	-0.620171	-0.560252		-0.707275	53	male	Liver	Chronic hepatitis					0	4
455	-0.699853	-0.55281		-0.655656	53	male	Liver	Chronic hepatitis					0	4
456	-0.608294	-0.502713		-0.903571	53	male	Liver	Chronic hepatitis					0	4
457	-0.591944	-0.269048		-0.244316	56	male	Liver	Hepatocellular carcinoma	T2N0M0	G1	2	tumor	0	14
458	-0.716103	-0.476423		-0.412036	56	male	Liver	Hepatocellular carcinoma	T2N0M0	G1	2	tumor	0	14
459	-0.360288	-0.159283		-0.121371	56	male	Liver	Hepatocellular carcinoma	T2N0M0	G1	2	tumor	0	14
460	-0.764388	-0.450049		-0.228858	56	male	Liver	Hepatocellular carcinoma	T2N0M0	G1	2	tumor	0	14
461	-0.519678	-0.694741		-0.689919	56	male	Liver	Hepatic steatosis					0	14
462	-0.729719	-0.800137		-0.891508	56	male	Liver	Hepatic steatosis					0	14
463	0.170788	-0.0220741		-0.14683	48	male	Liver	Hepatocellular carcinoma	T2N0M0	G1	2	tumor	1	32
464	0.229814	-0.0888974		-0.228178	48	male	Liver	Hepatocellular carcinoma	T2N0M0	G1	2	tumor	1	32
465	-0.0711667	-0.197217		-0.0858456	48	male	Liver	Hepatocellular carcinoma	T2N0M0	G1	2	tumor	1	32
466	-0.0111205	0.306877		-0.176813	48	male	Liver	Chronic hepatitis					1	32
467	-0.413329	0.0852174		0.120707	48	male	Liver	Chronic hepatitis					1	32
468	-0.226337	0.293734		0.0629642	48	male	Liver	Chronic hepatitis					1	32
469	-0.111496	0.218197		-0.274464	48	male	Liver	Chronic hepatitis					1	32
470	-0.34281	-0.362142		-0.510793	67	male	Liver	Hepatocellular carcinoma	T2N0M0	G2	2	tumor	1	54
471	0.0797285	-0.219276		-0.481299	67	male	Liver	Hepatocellular carcinoma	T2N0M0	G2	2	tumor	1	54
472	-0.217051	-0.207742		-0.491872	67	male	Liver	Hepatocellular carcinoma	T2N0M0	G2	2	tumor	1	54
473	-0.667165	0.591337		0.567777	67	male	Liver	Hepatocellular carcinoma	T2N0M0	G2	2	tumor	1	54
474	0.549793	-0.222706		-0.225871	67	male	Liver	Chronic hepatitis					1	54
475	-0.183946	-0.625842		-0.585553	67	male	Liver	Chronic hepatitis					1	54
476	0.0476561	-0.319146		-0.321009	67	male	Liver	Chronic hepatitis					1	54
477	0.315503	-0.202497		-0.275692	67	male	Liver	Chronic hepatitis					1	54
478	-0.0905244	-0.38619		-0.468032	55	male	Liver	Hepatocellular carcinoma	T2N0M0	G1.5	2	tumor	0	49
479	0.501352	0.0489625		-0.425365	55	male	Liver	Hepatocellular carcinoma	T2N0M0	G1.5	2	tumor	0	49
480	0.182777	-0.269639		-0.540792	55	male	Liver	Hepatocellular carcinoma	T2N0M0	G1.5	2	tumor	0	49
481	-0.0784051	-0.31084		-0.420194	55	male	Liver	Hepatocellular carcinoma	T2N0M0	G1.5	2	tumor	0	49
482	-0.425235	-0.42926		-0.431678	55	male	Liver	Chronic hepatitis					0	49
483	-0.37848	-0.473086		-1.04044	55	male	Liver	Chronic hepatitis					0	49
484	-0.209145	-0.0725061		-0.546831	55	male	Liver	Chronic hepatitis					0	49
485	-0.497935	-0.261083		-0.3153	55	male	Liver	Chronic hepatitis					0	49
486	-1.06475	-0.870785		-1.0345	65	male	Liver	Hepatocellular carcinoma	T2N0M0	G2	2	tumor	0	11
487	-1.07603	-0.844891		-0.982114	65	male	Liver	Hepatocellular carcinoma	T2N0M0	G2	2	tumor	0	11
488	-1.05175	-0.655915		-0.814251	65	male	Liver	Hepatocellular carcinoma	T2N0M0	G2	2	tumor	0	11
489	-0.961024	-0.491605		-0.851459	65	male	Liver	Hepatocellular carcinoma	T2N0M0	G2	2	tumor	0	11
490	-0.913221	-0.381388		-0.867708	65	male	Liver	Chronic hepatitis					0	11
491	-1.3195	-0.46856		-0.412204	65	male	Liver	Chronic hepatitis					0	11
492	-0.722937	-0.129415		-0.4239	65	male	Liver	Chronic hepatitis					0	11
493	-0.685816	-0.0908785		-0.503276	65	male	Liver	Chronic hepatitis					0	11
494	-0.824806	-1.10782		-1.72336	71	male	Liver	Hepatocellular carcinoma	T2N0M0	G2	2	tumor	0	14
495	-0.964539	-0.943737		-1.14256	71	male	Liver	Hepatocellular carcinoma	T2N0M0	G2	2	tumor	0	14
496	-1.11266	-0.941777		-1.05894	71	male	Liver	Hepatocellular carcinoma	T2N0M0	G2	2	tumor	0	14
497	-0.772341	-0.777463		-1.14592	71	male	Liver	Hepatocellular carcinoma	T2N0M0	G2	2	tumor	0	14
498	-0.179383	-0.315192		-0.836615	71	male	Liver	Chronic hepatitis					0	14
499	-0.234907	-0.251348		-0.758841	71	male	Liver	Chronic hepatitis					0	14
500	-0.483879	-0.0827443		-0.184799	71	male	Liver	Chronic hepatitis					0	14
501	-0.224044	-0.0491194		-0.774745	71	male	Liver	Chronic hepatitis					0	14
502	-0.551184	-0.494467		-0.603485	56	male	Liver	Hepatocellular carcinoma	T2N0M0	G2	2	tumor	1	49
503	-0.17642	-0.37394		-0.725889	56	male	Liver	Hepatocellular carcinoma	T2N0M0	G2	2	tumor	1	49
504	-0.335297	-0.407056		-0.551803	56	male	Liver	Hepatocellular carcinoma	T2N0M0	G2	2	tumor	1	49
505	-0.606574	-0.475846		-0.525132	56	male	Liver	Hepatocellular carcinoma	T2N0M0	G2	2	tumor	1	49
506	-0.0655801	0.0887776		-0.199883	56	male	Liver	Cirrhosis					1	49
507	-0.204907	-0.0328056		-0.000249024	56	male	Liver	Cirrhosis					1	49
508	-0.168533	0.00127671		0.0987875	56	male	Liver	Cirrhosis					1	49
509	-0.199911	-0.0314487		-0.159671	56	male	Liver	Cirrhosis					1	49
510	-0.135277	0.128811		-0.0865648	54	female1	Liver	Hepatocellular carcinoma	T2N0M0	G2	2	tumor	1	49
511	-0.184494	-0.173087		-0.29009	54	female1	Liver	Hepatocellular carcinoma	T2N0M0	G2	2	tumor	1	49
512	-0.183596	-0.0569035		-0.303971	54	female1	Liver	Hepatocellular carcinoma	T2N0M0	G2	2	tumor	1	49
513	-0.182229	-0.00449007		-0.166083	54	female1	Liver	Hepatocellular carcinoma	T2N0M0	G2	2	tumor	1	49
514	-0.568401	-0.577982		-0.747222	54	female1	Liver	Cirrhosis					1	49
515	-0.620625	-0.562128		-0.752095	54	female1	Liver	Cirrhosis					1	49
516	-0.753288	-0.642019		-0.717606	54	female1	Liver	Cirrhosis					1	49
517	-0.662144	-0.649145		-0.713964	54	female1	Liver	Cirrhosis					1	49
518	0.0294414	-0.60258		-0.947863	58	female1	Liver	Hepatocellular carcinoma	T2N0M0	G2	2	tumor	1	47
519	0.0257421	-0.744416		-1.06493	58	female1	Liver	Hepatocellular carcinoma	T2N0M0	G2	2	tumor	1	47
520	-0.00907285	-0.66614		-0.98171	58	female1	Liver	Hepatocellular carcinoma	T2N0M0	G2	2	tumor	1	47
521	-0.159931	-0.672104		-0.8539	58	female1	Liver	Hepatocellular carcinoma	T2N0M0	G2	2	tumor	1	47
522	0.224249	-0.183539		-0.238628	58	female1	Liver	Normal liver tissue					1	47
523	0.369195	-0.17069		-0.361801	58	female1	Liver	Normal liver tissue					1	47
524	0.0477312	-0.24166		-0.325957	58	female1	Liver	Normal liver tissue					1	47
525	0.114689	-0.204568		-0.348964	58	female1	Liver	Normal liver tissue					1	47
526	0.670316	-0.716631		-0.750787	50	male	Liver	Hepatocellular carcinoma	T2N0M0	G2	2	tumor	1	48
527	0.929541	-0.68447		-0.38447	50	male	Liver	Hepatocellular carcinoma	T2N0M0	G2	2	tumor	1	48
528	0.284741	-1.07973		-0.304992	50	male	Liver	Hepatocellular carcinoma	T2N0M0	G2	2	tumor	1	48
529	0.477807	-0.763882		-0.509548	50	male	Liver	Hepatocellular carcinoma	T2N0M0	G2	2	tumor	1	48
530	0.214574	-0.0573859		-0.252393	50	male	Liver	Chronic hepatitis					1	48
531	0.333119	-0.0736264		-0.36691	50	male	Liver	Chronic hepatitis					1	48
532	0.547226	0.0462452		-0.294648	50	male	Liver	Chronic hepatitis					1	48
533	0.405737	-0.00775109		-0.158966	50	male	Liver	Chronic hepatitis					1	48
534	-0.274285	-0.452573		-0.613128	52	male	Liver	Hepatocellular carcinoma	T2N0M0	G2	2	tumor	1	47
535	-0.271056	-0.251905		-0.401863	52	male	Liver	Hepatocellular carcinoma	T2N0M0	G2	2	tumor	1	47
536	-0.522033	-0.440569		-0.418678	52	male	Liver	Hepatocellular carcinoma	T2N0M0	G2	2	tumor	1	47
537	-0.169693	-0.281796		-0.375464	52	male	Liver	Hepatocellular carcinoma	T2N0M0	G2	2	tumor	1	47
538	-0.658172	-0.5399		-0.921903	52	male	Liver	Cirrhosis					1	47
539	-0.833792	-0.439913		-0.622337	52	male	Liver	Cirrhosis					1	47
540	-0.598907	-0.383613		-0.783495	52	male	Liver	Cirrhosis					1	47
541	-0.613127	-0.374628		-0.69079	52	male	Liver	Cirrhosis					1	47
542	-0.767978	-0.567017		-0.681641	52	male	Liver	Hepatocellular carcinoma	T2N0M0	G2	2	tumor	0	35
543	-1.01271	-1.02309		-1.19701	52	male	Liver	Hepatocellular carcinoma	T2N0M0	G2	2	tumor	0	35
544	-1.22628	-1.1715		-1.14099	52	male	Liver	Hepatocellular carcinoma	T2N0M0	G2	2	tumor	0	35
545	-0.658931	-0.872456		-1.10478	52	male	Liver	Hepatocellular carcinoma	T2N0M0	G2	2	tumor	0	35
546	-1.18281	-0.80247		-0.924957	52	male	Liver	Chronic hepatitis					0	35
547	-1.15528	-1.19342		-1.60282	52	male	Liver	Chronic hepatitis					0	35
548	-1.3604	-0.931662		-1.09099	52	male	Liver	Chronic hepatitis					0	35
549	-0.942791	-0.551308		-0.948899	52	male	Liver	Chronic hepatitis					0	35
550	0.195227	-0.375147		-0.766589	47	male	Liver	Hepatocellular carcinoma	T2N0M0	G1.5	2	tumor	1	42
551	0.165942	-0.488362		-0.968024	47	male	Liver	Hepatocellular carcinoma	T2N0M0	G1.5	2	tumor	1	42
552	0.154514	-0.452374		-0.675823	47	male	Liver	Hepatocellular carcinoma	T2N0M0	G1.5	2	tumor	1	42
553	0.145795	-0.406429		-0.707203	47	male	Liver	Hepatocellular carcinoma	T2N0M0	G1.5	2	tumor	1	42
554	-0.49632	-0.182281		-0.284113	47	male	Liver	Chronic hepatitis					1	42
555	-0.597073	-0.229904		-0.449656	47	male	Liver	Chronic hepatitis					1	42
556	-0.588686	-0.533299		-0.601051	47	male	Liver	Chronic hepatitis					1	42
557	-0.349039	0.0902077		-0.0452928	47	male	Liver	Chronic hepatitis					1	42
558	-0.304535	-0.293113		-0.205779	48	female1	Liver	Hepatocellular carcinoma	T2N0M0	G2	2	tumor	0	25
559	0.0963157	-0.0723409		-0.218914	48	female1	Liver	Hepatocellular carcinoma	T2N0M0	G2	2	tumor	0	25
560	0.020063	-0.143937		-0.19803	48	female1	Liver	Hepatocellular carcinoma	T2N0M0	G2	2	tumor	0	25
561	-0.310479	-0.39083		-0.262969	48	female1	Liver	Hepatocellular carcinoma	T2N0M0	G2	2	tumor	0	25
562	0.224231	0.274564		0.287717	48	female1	Liver	Cirrhosis					0	25
563	0.0641673	0.156779		0.254247	48	female1	Liver	Cirrhosis					0	25
564	0.479695	0.422483		0.292091	48	female1	Liver	Cirrhosis					0	25
565	0.35439	0.306021		0.36056	48	female1	Liver	Cirrhosis					0	25
566	0.492043	0.13514		0.0559254	52	male	Liver	Hepatocellular carcinoma	T2N0M0	G1.5	2	tumor	1	41
567	0.617828	0.0896814		-0.027496	52	male	Liver	Hepatocellular carcinoma	T2N0M0	G1.5	2	tumor	1	41
568	0.720083	0.118189		-0.0468095	52	male	Liver	Hepatocellular carcinoma	T2N0M0	G1.5	2	tumor	1	41
569	0.50637	0.112271		0.0734224	52	male	Liver	Hepatocellular carcinoma	T2N0M0	G1.5	2	tumor	1	41
570	-0.500955	-0.171973		-0.157018	52	male	Liver	Chronic hepatitis					1	41
571	-0.0705545	0.126475		0.180445	52	male	Liver	Chronic hepatitis					1	41
572	0.552937	0.121351		-0.153056	54	male	Liver	Hepatocellular carcinoma	T2N0M0	G2	2	tumor	0	17
573	0.416645	-0.0334659		-0.148684	54	male	Liver	Hepatocellular carcinoma	T2N0M0	G2	2	tumor	0	17
574	0.365527	-0.182345		-0.148636	54	male	Liver	Hepatocellular carcinoma	T2N0M0	G2	2	tumor	0	17
575	0.71079	0.139427		-0.0898455	54	male	Liver	Hepatocellular carcinoma	T2N0M0	G2	2	tumor	0	17
576	-0.0545361	-0.285889		-0.0999081	54	male	Liver	Chronic hepatitis					0	17
577	0.235048	-0.0400719		-0.224396	54	male	Liver	Chronic hepatitis					0	17
578	0.217909	0.0675569		-0.0113857	54	male	Liver	Chronic hepatitis					0	17
579	0.359214	-0.028192		-0.215145	54	male	Liver	Chronic hepatitis					0	17
580	-0.363339	-0.786746		-0.854551	57	male	Liver	Hepatocellular carcinoma	T2N0M0	G2	2	tumor	0	11
581	-0.382006	-0.845849		-0.965201	57	male	Liver	Hepatocellular carcinoma	T2N0M0	G2	2	tumor	0	11
582	0.00172096	-0.0888021		-0.0501819	57	male	Liver	Chronic hepatitis					0	11
583	0.0870427	0.0715924		-0.0441144	57	male	Liver	Chronic hepatitis					0	11
584	-0.508026	-0.360115		-0.0574117	57	male	Liver	Chronic hepatitis					0	11
585	0.167694	0.0530299		-0.09969	57	male	Liver	Chronic hepatitis					0	11
586	0.71153	0.308386		-0.02106	43	male	Liver	Hepatocellular carcinoma	T2N0M0	G2	2	tumor	0	4
587	0.340548	-0.0894039		-0.228202	43	male	Liver	Hepatocellular carcinoma	T2N0M0	G2	2	tumor	0	4
588	0.556024	0.0489694		-0.27146	43	male	Liver	Hepatocellular carcinoma	T2N0M0	G2	2	tumor	0	4
589	0.569865	0.178059		0.00455381	43	male	Liver	Hepatocellular carcinoma	T2N0M0	G2	2	tumor	0	4
590	-0.206301	0.0256249		-0.404732	43	male	Liver	Chronic hepatitis					0	4
591	-0.019592	0.317903		0.193936	43	male	Liver	Chronic hepatitis					0	4
592	0.0424383	1.1535		1.0961	54	male	Liver	Hepatocellular carcinoma	T2N0M0	G2	2	tumor	1	32
593	-0.0242645	0.695887		0.292658	54	male	Liver	Hepatocellular carcinoma	T2N0M0	G2	2	tumor	1	32
594	-0.10609	0.951044		0.834663	54	male	Liver	Hepatocellular carcinoma	T2N0M0	G2	2	tumor	1	32
595	-0.305043	1.36299		1.40308	54	male	Liver	Hepatocellular carcinoma	T2N0M0	G2	2	tumor	1	32
596	-0.435966	-0.263198		0.0172195	54	male	Liver	Chronic hepatitis					1	32
597	-0.0067709	0.240994		0.0886029	54	male	Liver	Chronic hepatitis					1	32
598	-0.305695	-0.106101		0.00981875	54	male	Liver	Chronic hepatitis					1	32
599	-0.22987	-0.047805		0.163095	54	male	Liver	Chronic hepatitis					1	32
600	-0.122824	-0.268125		-0.491772	60	male	Liver	Hepatocellular carcinoma	T2N0M0	G2.5	2	tumor	1	54
601	-0.638059	-0.503691		-0.438613	60	male	Liver	Hepatocellular carcinoma	T2N0M0	G2.5	2	tumor	1	54
602	-0.52634	-0.187354		-0.337712	60	male	Liver	Hepatocellular carcinoma	T2N0M0	G2.5	2	tumor	1	54
603	-0.732061	-0.621098		-0.787855	60	male	Liver	Hepatocellular carcinoma	T2N0M0	G2.5	2	tumor	1	54
604	-0.695318	0.0482274		-0.0940883	60	male	Liver	Chronic hepatitis					1	54
605	-0.895022	-0.0512921		-0.0171587	60	male	Liver	Chronic hepatitis					1	54
606	-0.62569	-0.00478705		-0.0897575	60	male	Liver	Chronic hepatitis					1	54
607	-0.748583	-0.0908565		0.0777857	60	male	Liver	Chronic hepatitis					1	54
608	0.120181	0.196029		0.493054	58	male	Liver	Hepatocellular carcinoma	T2N0M0	G2.5	2	tumor	1	53
609	-0.0971111	0.375365		0.617142	58	male	Liver	Hepatocellular carcinoma	T2N0M0	G2.5	2	tumor	1	53
610	0.145446	0.44921		0.71625	58	male	Liver	Hepatocellular carcinoma	T2N0M0	G2.5	2	tumor	1	53
611	0.316571	0.355361		0.506794	58	male	Liver	Hepatocellular carcinoma	T2N0M0	G2.5	2	tumor	1	53
612	0.0540888	0.294817		0.596903	58	male	Liver	Chronic hepatitis					1	53
613	-0.323297	-0.0512962		0.377959	58	male	Liver	Chronic hepatitis					1	53
614	-0.139758	0.00491004		0.245622	58	male	Liver	Chronic hepatitis					1	53
615	-0.187475	0.162609		0.574404	58	male	Liver	Chronic hepatitis					1	53
616	0.189418	-0.349734		-0.258476	57	male	Liver	Hepatocellular carcinoma	T2N0M0	G2	2	tumor	0	43
617	0.177904	-0.375275		-0.193554	57	male	Liver	Hepatocellular carcinoma	T2N0M0	G2	2	tumor	0	43
618	0.300069	-0.2541		-0.180051	57	male	Liver	Hepatocellular carcinoma	T2N0M0	G2	2	tumor	0	43
619	0.4955	-0.0858917		-0.063573	57	male	Liver	Hepatocellular carcinoma	T2N0M0	G2	2	tumor	0	43
620	0.169757	-0.0170658		0.484336	57	male	Liver	Chronic hepatitis					0	43
621	0.0735444	-0.237509		0.540155	57	male	Liver	Chronic hepatitis					0	43
622	0.05821	-0.133327		0.416612	57	male	Liver	Chronic hepatitis					0	43
623	0.346791	-0.397254		-0.206178	51	male	Liver	Hepatocellular carcinoma	T2N0M0	G2	2	tumor	0	29
624	0.0843262	-0.459648		-0.137166	51	male	Liver	Hepatocellular carcinoma	T2N0M0	G2	2	tumor	0	29
625	0.236129	-0.180321		0.35656	51	male	Liver	Hepatocellular carcinoma	T2N0M0	G2	2	tumor	0	29
626	-0.288171	-0.657111		0.463008	51	male	Liver	Hepatocellular carcinoma	T2N0M0	G2	2	tumor	0	29
627	0.569689	0.649316		0.653266	51	male	Liver	Hepatic steatosis					0	29
628	0.577933	0.685247		0.634744	51	male	Liver	Hepatic steatosis					0	29
629	0.46252	0.512278		0.693587	51	male	Liver	Hepatic steatosis					0	29
630	0.13904	0.437437		0.749362	51	male	Liver	Hepatic steatosis					0	29
631	0.119308	0.608988		0.33416	57	female1	Liver	Chronic hepatitis	T2N0M0	G2	2	tumor	0	2
632	0.119811	0.203758		-0.223128	57	female1	Liver	Chronic hepatitis	T2N0M0	G2	2	tumor	0	2
633	0.352668	0.473407		0.132103	57	female1	Liver	Chronic hepatitis	T2N0M0	G2	2	tumor	0	2
634	0.426074	0.673434		0.480071	57	female1	Liver	Chronic hepatitis	T2N0M0	G2	2	tumor	0	2
635	-0.307977	-0.118392		-0.0124752	57	female1	Liver	Hepatic steatosis					1	48
636	-0.0565473	0.128047		0.0632182	57	female1	Liver	Hepatic steatosis					1	48
637	0.011257	0.0960521		0.0460813	57	female1	Liver	Hepatic steatosis					1	48
638	-0.0439459	0.0443326		0.0373771	57	female1	Liver	Hepatic steatosis					1	48
639	0.261759	-0.0482944		-0.00600457	61	male	Liver	Hepatocellular carcinoma	T2N0M0	G0	2	tumor	1	31
640	0.520409	0.224739		-0.0836734	61	male	Liver	Hepatocellular carcinoma	T2N0M0	G0	2	tumor	1	31
641	0.401231	0.455418		0.370969	61	male	Liver	Hepatocellular carcinoma	T2N0M0	G0	2	tumor	1	31
642	0.0234248	-0.0808411		0.156901	61	male	Liver	Hepatocellular carcinoma	T2N0M0	G0	2	tumor	1	31
643	-0.279693	-0.246291		-0.202867	61	male	Liver	Chronic hepatitis					1	31
644	-0.0737972	0.128686		0.086554	61	male	Liver	Chronic hepatitis					1	31
645	-0.380673	-0.319073		-0.312861	46	male	Liver	Hepatocellular carcinoma	T2N0M0	G3	2	tumor	0	16
646	-0.469006	-0.449577		-0.419249	46	male	Liver	Hepatocellular carcinoma	T2N0M0	G3	2	tumor	0	16
647	-0.271703	-0.373731		-0.728291	46	male	Liver	Hepatocellular carcinoma	T2N0M0	G3	2	tumor	0	16
648	-0.680161	-0.578044		-0.39398	46	male	Liver	Hepatocellular carcinoma	T2N0M0	G3	2	tumor	0	16
649	-0.428469	-0.156761		-0.497244	46	male	Liver	Cirrhosis					0	16
650	-0.97114	-0.403027		-0.116007	46	male	Liver	Cirrhosis					0	16
651	-0.412009	-0.0251195		-0.171289	46	male	Liver	Cirrhosis					0	16
652	-0.459949	-0.382151		-0.770544	46	male	Liver	Cirrhosis					0	16
653	0.225107	-0.405054		0.369691	52	male	Liver	Hepatocellular carcinoma	T2N0M0	G3	2	tumor	0	16
654	0.293223	-0.490508		0.35076	52	male	Liver	Hepatocellular carcinoma	T2N0M0	G3	2	tumor	0	16
655	0.241314	-0.435518		0.26704	52	male	Liver	Hepatocellular carcinoma	T2N0M0	G3	2	tumor	0	16
656	0.274617	-0.251592		0.432154	52	male	Liver	Hepatocellular carcinoma	T2N0M0	G3	2	tumor	0	16
657	0.158367	0.833708		0.866644	52	male	Liver	Chronic hepatitis					0	16
658	0.167838	0.508705		0.603082	52	male	Liver	Chronic hepatitis					0	16
659	0.228075	0.429859		0.469422	52	male	Liver	Chronic hepatitis					0	16
660	0.444512	0.574497		0.305903	52	male	Liver	Chronic hepatitis					0	16
661	0.386704	-0.386057		-0.424116	56	male	Liver	Hepatocellular carcinoma	T2N0M0	G3	2	tumor	0	6
662	0.0255606	-0.489422		-0.0938328	56	male	Liver	Hepatocellular carcinoma	T2N0M0	G3	2	tumor	0	6
663	0.0373772	-0.455379		0.129803	56	male	Liver	Hepatocellular carcinoma	T2N0M0	G3	2	tumor	0	6
664	0.11905	-0.506556		-0.218222	56	male	Liver	Hepatocellular carcinoma	T2N0M0	G3	2	tumor	0	6
665	0.400014	0.430457		0.224407	56	male	Liver	Chronic hepatitis					0	6
666	0.455163	0.564075		0.457642	56	male	Liver	Chronic hepatitis					0	6
667	0.458753	0.535735		0.402831	56	male	Liver	Chronic hepatitis					0	6
668	0.485143	0.537554		0.394059	56	male	Liver	Chronic hepatitis					0	6
669	0.826378	-0.0888506		0.0839781	72	male	Liver	Hepatocellular carcinoma	T2N0M0	G3	2	tumor	0	4
670	0.811842	-0.0491788		0.186545	72	male	Liver	Hepatocellular carcinoma	T2N0M0	G3	2	tumor	0	4
671	0.958996	0.19773		0.266882	72	male	Liver	Hepatocellular carcinoma	T2N0M0	G3	2	tumor	0	4
672	0.81326	0.179978		0.296388	72	male	Liver	Hepatocellular carcinoma	T2N0M0	G3	2	tumor	0	4
673	0.436762	0.775798		0.567938	72	female1	Liver	Liver cell degeneration					0	4
674	0.352895	0.62528		0.134248	72	female1	Liver	Liver cell degeneration					0	4
675	0.0480452	0.513615		0.545489	72	female1	Liver	Liver cell degeneration					0	4
676	0.391571	0.6271		0.233254	72	female1	Liver	Liver cell degeneration					0	4
677	0.367713	0.056714		0.106079	68	female1	Liver	Hepatocellular carcinoma	T2N0M0	G3	2	tumor	0	0
678	0.752291	0.361248		0.321106	68	female1	Liver	Hepatocellular carcinoma	T2N0M0	G3	2	tumor	0	0
679	0.499177	0.183421		0.403156	68	female1	Liver	Hepatocellular carcinoma	T2N0M0	G3	2	tumor	0	0
680	0.443354	0.618903		0.656072	68	female1	Liver	Hepatocellular carcinoma	T2N0M0	G3	2	tumor	0	0
681	0.558893	0.745854		0.907713	68	male	Liver	Chronic hepatitis					0	0
682	0.811009	0.851543		0.535991	68	male	Liver	Chronic hepatitis					0	0
683	0.677479	0.81044		0.540889	68	male	Liver	Chronic hepatitis					0	0
684	0.597351	0.80702		0.706042	68	male	Liver	Chronic hepatitis					0	0
685	0.0648614	-0.0176368		-0.264543	43	male	Liver	Hepatocellular carcinoma	T3N0M0	G2	3	tumor	1	60
686	0.0497387	-0.020687		-0.181821	43	male	Liver	Hepatocellular carcinoma	T3N0M0	G2	3	tumor	1	60
687	0.265158	0.145495		-0.380529	43	male	Liver	Hepatocellular carcinoma	T3N0M0	G2	3	tumor	1	60
688	0.261726	0.144642		-0.167291	43	male	Liver	Hepatocellular carcinoma	T3N0M0	G2	3	tumor	1	60
689	-0.403681	0.216202		0.206625	43	male	Liver	Chronic hepatitis					1	60
690	-0.226014	0.104744		-0.24802	43	male	Liver	Chronic hepatitis					1	60
691	-0.0957637	0.276272		-0.158759	43	male	Liver	Chronic hepatitis					1	60
692	-0.208963	0.152486		-0.386828	43	male	Liver	Chronic hepatitis					1	60
693	0.464936	0.357624		-0.359043	47	male	Liver	Hepatocellular carcinoma	T3N0M0	G2	3	tumor	1	59
694	0.207325	0.243405		-0.186578	47	male	Liver	Hepatocellular carcinoma	T3N0M0	G2	3	tumor	1	59
695	0.489866	0.453547		-0.195249	47	male	Liver	Hepatocellular carcinoma	T3N0M0	G2	3	tumor	1	59
696	0.37352	0.340403		-0.0530855	47	male	Liver	Hepatocellular carcinoma	T3N0M0	G2	3	tumor	1	59
697	0.0300272	0.817233		0.687499	47	male	Liver	Chronic hepatitis					1	59
698	-0.0154342	0.762978		0.652642	47	male	Liver	Chronic hepatitis					1	59
699	0.151395	0.806427		0.465658	47	male	Liver	Chronic hepatitis					1	59
700	0.167229	0.77575		0.292355	47	male	Liver	Chronic hepatitis					1	59
701	0.129946	0.394768		0.0879673	58	male	Liver	Hepatocellular carcinoma	T3N0M0	G2	3	tumor	1	52
702	-0.21689	0.0448726		-0.394441	58	male	Liver	Hepatocellular carcinoma	T3N0M0	G2	3	tumor	1	52
703	-0.393177	0.0188117		0.0442358	58	male	Liver	Hepatocellular carcinoma	T3N0M0	G2	3	tumor	1	52
704	-0.308465	0.0266012		0.0356597	58	male	Liver	Hepatocellular carcinoma	T3N0M0	G2	3	tumor	1	52
705	-0.133622	0.577764		0.178645	58	male	Liver	Normal liver tissue					1	52
706	-0.340576	0.371364		-0.161548	58	male	Liver	Normal liver tissue					1	52
707	-0.343591	0.400281		-0.0126815	58	male	Liver	Normal liver tissue					1	52
708	-0.270609	0.510947		0.149567	58	male	Liver	Normal liver tissue					1	52
709	-0.349867	-0.366405		-0.220316	56	male	Liver	Hepatocellular carcinoma	T3N0M0	G3	3	tumor	0	4
710	-0.275178	-0.442053		-0.414525	56	male	Liver	Hepatocellular carcinoma	T3N0M0	G3	3	tumor	0	4
711	-0.202582	-0.169555		0.321364	56	male	Liver	Chronic hepatitis					0	4
712	-0.0765414	-0.0828844		0.342169	56	male	Liver	Chronic hepatitis					0	4
713	0.151531	0.0977444		0.421161	56	male	Liver	Chronic hepatitis					0	4
714	0.307833	0.250196		0.447169	56	male	Liver	Chronic hepatitis					0	4
715	0.972831	0.263887		0.636468	57	male	Liver	Hepatocellular carcinoma	T3N0M0	G3	3	tumor	0	29
716	1.12022	0.209781		0.674164	57	male	Liver	Hepatocellular carcinoma	T3N0M0	G3	3	tumor	0	29
717	1.10606	0.195481		0.896126	57	male	Liver	Hepatocellular carcinoma	T3N0M0	G3	3	tumor	0	29
718	0.747499	-0.0359149		0.966551	57	male	Liver	Hepatocellular carcinoma	T3N0M0	G3	3	tumor	0	29
719	0.572826	0.377928		0.680136	57	male	Liver	Chronic hepatitis					0	29
720	0.721336	0.540199		0.823075	57	male	Liver	Chronic hepatitis					0	29
721	0.422845	0.294493		0.79448	57	male	Liver	Chronic hepatitis					0	29
722	0.226828	0.134596		0.662327	57	male	Liver	Chronic hepatitis					0	29
723	0.29097	0.136775		0.219906	70	male	Liver	Hepatocellular carcinoma	T2N1M0	G2	3	tumor	0	13
724	0.045339	-0.116611		0.134801	70	male	Liver	Hepatocellular carcinoma	T2N1M0	G2	3	tumor	0	13
725	0.466899	0.0762511		0.317798	70	male	Liver	Hepatocellular carcinoma	T2N1M0	G2	3	tumor	0	13
726	0.58826	0.355683		0.833428	70	male	Liver	Hepatocellular carcinoma	T2N1M0	G2	3	tumor	0	13
727	0.571486	0.683467		0.843744	70	male	Liver	Chronic hepatitis					0	13
728	0.561591	0.777634		0.848866	70	male	Liver	Chronic hepatitis					0	13
729	0.518906	0.795451		0.962901	70	male	Liver	Chronic hepatitis					0	13
730	0.216329	-0.0816471		-0.667714	70	male	Liver	Chronic hepatitis					0	13
731	0.21528	1.1036		0.867334	49	male	Liver	Hepatocellular carcinoma	T4N0M0	G2	4	tumor	0	11
732	0.189957	1.06525		1.16321	49	male	Liver	Hepatocellular carcinoma	T4N0M0	G2	4	tumor	0	11
733	0.339286	1.05285		0.820856	49	male	Liver	Hepatocellular carcinoma	T4N0M0	G2	4	tumor	0	11
734	0.0474385	0.374294		-0.0124313	49	male	Liver	Hepatocellular carcinoma	T4N0M0	G2	4	tumor	0	11
735	0.602271	0.86809		1.20847	49	male	Liver	Inflammation of portal area					0	11
736	0.690118	0.994746		0.916846	49	male	Liver	Inflammation of portal area					0	11
737	0.800676	1.02938		0.979934	49	male	Liver	Inflammation of portal area					0	11
738	0.349612	0.718023		1.18181	49	male	Liver	Inflammation of portal area					0	11
739	-0.106109	-0.172279		-0.337289	48	male	Liver	Hepatocellular carcinoma	T4N0M0	G2	4	tumor	0	8
740	0.128182	-0.143502		-0.36941	48	male	Liver	Hepatocellular carcinoma	T4N0M0	G2	4	tumor	0	8
741	-0.082499	-0.166219		-0.446069	48	male	Liver	Hepatocellular carcinoma	T4N0M0	G2	4	tumor	0	8
742	-0.285127	-0.280185		-0.146649	48	male	Liver	Hepatocellular carcinoma	T4N0M0	G2	4	tumor	0	8
743	0.134721	0.228934		0.314008	48	male	Liver	Chronic hepatitis					0	8
744	-0.0650827	0.0858849		0.285432	48	male	Liver	Chronic hepatitis					0	8
745	-0.388113	-0.105984		0.198284	48	male	Liver	Chronic hepatitis					0	8
746	-0.19253	0.0559729		0.252747	48	male	Liver	Chronic hepatitis					0	8
747	-0.335377	-0.448675		-0.255461	49	male	Liver	Hepatocellular carcinoma	T4N0M0	G2	4	tumor	0	4
748	-0.112731	-0.159567		-0.0222627	49	male	Liver	Hepatocellular carcinoma	T4N0M0	G2	4	tumor	0	4
749	-0.0611615	-0.106633		0.0409472	49	male	Liver	Hepatocellular carcinoma	T4N0M0	G2	4	tumor	0	4
750	-0.113161	-0.319443		-0.522249	49	male	Liver	Hepatocellular carcinoma	T4N0M0	G2	4	tumor	0	4
751	0.0484761	0.376603		-0.0687458	49	male	Liver	Liver tissue degeneration					0	4
752	0.0877531	0.647759		0.680559	49	male	Liver	Liver tissue degeneration					0	4
753	-0.0534539	0.648667		0.85169	49	male	Liver	Liver tissue degeneration					0	4
754	0.104751	0.72462		0.491221	49	male	Liver	Liver tissue degeneration					0	4
755	-0.462242	-0.721878		-0.703093	51	male	Liver	Hepatocellular carcinoma	T4N0M0	G2	4	tumor	0	22
756	-0.316236	-0.522908		-0.357938	51	male	Liver	Hepatocellular carcinoma	T4N0M0	G2	4	tumor	0	22
757	-0.306936	-0.396898		0.098883	51	male	Liver	Hepatocellular carcinoma	T4N0M0	G2	4	tumor	0	22
758	-0.50705	-0.473476		0.252342	51	male	Liver	Hepatocellular carcinoma	T4N0M0	G2	4	tumor	0	22
759	-0.432045	0.033646		-0.15038	51	female1	Liver	Chronic hepatitis					0	22
760	-0.782001	0.0251968		0.186548	51	female1	Liver	Chronic hepatitis					0	22
761	-0.386467	0.187579		0.369377	51	female1	Liver	Chronic hepatitis					0	22
762	-0.148698	0.133607		-0.19521	51	female1	Liver	Chronic hepatitis					0	22
763	-0.574774	-0.894371		-0.544033	56	female1	Liver	Hepatocellular carcinoma	T4N0M0	G2.5	4	tumor	0	4
764	-0.192484	-0.693616		-0.429747	56	female1	Liver	Hepatocellular carcinoma	T4N0M0	G2.5	4	tumor	0	4
765	-0.226646	-0.658225		-0.309127	56	female1	Liver	Hepatocellular carcinoma	T4N0M0	G2.5	4	tumor	0	4
766	-0.0727314	-0.57508		-0.430594	56	female1	Liver	Hepatocellular carcinoma	T4N0M0	G2.5	4	tumor	0	4
767	0.66204	0.704549		1.0979	56	male	Liver	Chronic hepatitis					0	4
768	0.70991	0.682352		1.0165	56	male	Liver	Chronic hepatitis					0	4
769	0.817116	0.800334		1.12015	56	male	Liver	Chronic hepatitis					0	4
770	0.931804	1.10207		1.24703	56	male	Liver	Chronic hepatitis					0	4
771	0.276864	-0.0638929		-0.0951658	38	male	Liver	Hepatocellular carcinoma	T2N0M1	G2	4	tumor	0	39
772	-0.199231	-0.4558		-0.154268	38	male	Liver	Hepatocellular carcinoma	T2N0M1	G2	4	tumor	0	39
773	-0.438142	-0.75476		-0.419202	38	male	Liver	Hepatocellular carcinoma	T2N0M1	G2	4	tumor	0	39
774	0.0332096	-0.473908		-0.558084	38	male	Liver	Hepatocellular carcinoma	T2N0M1	G2	4	tumor	0	39
775	0.427987	0.368898		0.424135	38	male	Liver	Chronic hepatitis					0	39
776	0.335901	0.589727		0.751905	38	male	Liver	Chronic hepatitis					0	39
777	0.326339	0.641015		0.754403	38	male	Liver	Chronic hepatitis					0	39
778	0.311494	0.621966		0.763107	38	male	Liver	Chronic hepatitis					0	39
779	-0.0578915	0.21025		0.534844	47	male	Liver	Cirrhosis					1	41
780	0.109155	0.285533		0.34229	47	male	Liver	Cirrhosis					1	41
781	0.093436	0.108008		0.0672403	47	male	Liver	Cirrhosis					1	41
782	-0.373865	-0.091435		0.235035	47	male	Liver	Cirrhosis					1	41
783	0.0597142	0.400238		0.496591	56	male	Liver	Chronic hepatitis					0	13
784	-0.0263781	0.357904		0.415785	56	male	Liver	Chronic hepatitis					0	13
785	-0.0222104	0.316876		0.489715	56	male	Liver	Chronic hepatitis					0	13
786	0.0851449	0.295204		0.228746	56	male	Liver	Chronic hepatitis					0	13
787	-0.0235579	-0.00880657		-0.0679784	56	male	Liver	Hepatocellular carcinoma	T3N0M0	G1	3	tumor	0	32
788	-0.0991034	0.0195434		0.29411	56	male	Liver	Hepatocellular carcinoma	T3N0M0	G1	3	tumor	0	32
789	0.0758303	0.0848909		0.113545	56	male	Liver	Hepatocellular carcinoma	T3N0M0	G1	3	tumor	0	32
790	-0.324116	-0.16752		0.160408	56	male	Liver	Hepatocellular carcinoma	T3N0M0	G1	3	tumor	0	32
