# Supplementary material for: The Human TOR Signaling Regulator Is the Key Indicator of Liver Cancer Patients’ Overall Survival: TIPRL/LC3/CD133/CD44 as Potential Biomarkers for Early Liver Cancers
Source: Cancers (Basel). 2021 Jun 11;13(12):2925. doi: 10.3390/cancers13122925 (PMC8230774; doi:10.3390/cancers13122925)
Supplement: Supplementary file 1 [file cancers-13-02925-s001.zip › Table S3.xlsx]

## Sheet: Sheet1
Table S3. Expression of covariates, TIPRL, LC3, CD133, CD46, and several clinic-pathological parameters in the validation set
	TIPRL	LC3	CD133	CD46	Age	Status	Sex	Organ/Site	diagnosis	TNM	Grade	Stage
1	-0.289775	-0.432231	-0.616125		67	0	Female	Liver	Cancer adjacent liver tissue
2	0.555812	0.384065	0.749512		67	0	Female	Liver	Cancer adjacent liver tissue
3	0.766322	0.533416	0.747453		67	0	Female	Liver	Cancer adjacent liver tissue
4	0.445393	0.380863	0.667196		67	0	Female	Liver	Cancer adjacent liver tissue
5	-0.00108061	0.0704745	0.102738		75	0	Female	Liver	Cancer adjacent liver tissue
6	-0.00801379	0.150379	-0.0206444		75	0	Female	Liver	Cancer adjacent liver tissue
7	0.164524	0.338615	0.223066		75	0	Female	Liver	Cancer adjacent liver tissue
8	0.0234694	0.170368	0.00587629		75	0	Female	Liver	Cancer adjacent liver tissue
9	-0.965797	-0.762206	-0.680128		56	0	male	Liver	Cancer adjacent liver tissue
10	-0.902565	-0.661752	-0.543803		56	0	male	Liver	Cancer adjacent liver tissue
11	-1.49153	-1.39933	-1.52991		56	0	male	Liver	Cancer adjacent liver tissue
12	-0.920717	-0.810627	-0.560773		56	0	male	Liver	Cancer adjacent liver tissue
13	0.136179	0.0366632	0.0628394		51	0	Female	Liver	Cancer adjacent liver tissue
14	0.127491	0.131807	0.00012091		51	0	Female	Liver	Cancer adjacent liver tissue
15	0.435701	0.411776	0.252006		51	0	Female	Liver	Cancer adjacent liver tissue
16	0.125221	0.105145	0.034721		51	0	Female	Liver	Cancer adjacent liver tissue
17	0.0861023	0.126104	-0.175669		52	0	Female	Liver	Cancer adjacent liver tissue
18	0.0630406	0.0520281	-0.0985327		52	0	Female	Liver	Cancer adjacent liver tissue
19	-0.0509509	-0.0923047	-0.190495		52	0	Female	Liver	Cancer adjacent liver tissue
20	-0.181883	-0.167751	-0.186269		52	0	Female	Liver	Cancer adjacent liver tissue
21	-0.508771	-0.220154	0.135529		56	0	Female	Liver	Intrahepatic cholangiocarcinoma	T2N0M0	G2	2
22	-0.398912	-0.0520186	0.0081535		56	0	Female	Liver	Intrahepatic cholangiocarcinoma	T2N0M0	G2	2
23	-0.274737	0.142763	0.154454		56	0	Female	Liver	Intrahepatic cholangiocarcinoma	T2N0M0	G2	2
24	-0.288276	0.00393766	0.105061		56	0	Female	Liver	Intrahepatic cholangiocarcinoma	T2N0M0	G2	2
25	-0.684354	-0.828947	-1.1658		59	0	Female	Liver	Intrahepatic cholangiocarcinoma	T3N0M0	G2	3
26	-0.739789	-0.892456	-0.859792		59	0	Female	Liver	Intrahepatic cholangiocarcinoma	T3N0M0	G2	3
27	-1.07488	-0.943269	-0.907517		59	0	Female	Liver	Intrahepatic cholangiocarcinoma	T3N0M0	G2	3
28	-0.840188	-0.885537	-1.28086		59	0	Female	Liver	Intrahepatic cholangiocarcinoma	T3N0M0	G2	3
29	-0.271929	-0.12069	-0.582296		64	0	male	Liver	Intrahepatic cholangiocarcinoma	T2N0M0	G3	2
30	-0.207551	-0.177324	-0.494993		64	0	male	Liver	Intrahepatic cholangiocarcinoma	T2N0M0	G3	2
31	0.224205	0.268645	0.191222		64	0	male	Liver	Intrahepatic cholangiocarcinoma	T2N0M0	G3	2
32	0.225576	0.358774	0.532996		64	0	male	Liver	Intrahepatic cholangiocarcinoma	T2N0M0	G3	2
33	-0.943076	-0.278793	-0.520557		49	0	male	Liver	Intrahepatic cholangiocarcinoma	T2N0M0	G3	2
34	-1.15421	-0.509482	-0.635257		49	0	male	Liver	Intrahepatic cholangiocarcinoma	T2N0M0	G3	2
35	-1.08895	-0.47671	-0.557348		49	0	male	Liver	Intrahepatic cholangiocarcinoma	T2N0M0	G3	2
36	-0.902264	-0.267447	-0.50146		49	0	male	Liver	Intrahepatic cholangiocarcinoma	T2N0M0	G3	2
37	-0.347079	0.00135343	-0.443478		56	0	male	Liver	Hepatocellular carcinoma	T3N0M0	G2	3
38	0.0100763	0.396336	-0.0455885		56	0	male	Liver	Hepatocellular carcinoma	T3N0M0	G2	3
39	-0.126992	0.205715	-0.028397		56	0	male	Liver	Hepatocellular carcinoma	T3N0M0	G2	3
40	-0.289775	-0.0234472	-0.486833		56	0	male	Liver	Hepatocellular carcinoma	T3N0M0	G2	3
41	-1.506	-1.0819	-1.0902		55	0	male	Liver	Intrahepatic cholangiocarcinoma	T3N1M0	G1	4
42	-1.51208	-1.25548	-1.50258		55	0	male	Liver	Intrahepatic cholangiocarcinoma	T3N1M0	G1	4
43	-2.37158	-2.48114	-2.72281		55	0	male	Liver	Intrahepatic cholangiocarcinoma	T3N1M0	G1	4
44	-2.8822	-2.80586	-2.99248		55	0	male	Liver	Intrahepatic cholangiocarcinoma	T3N1M0	G1	4
45	-1.23808	-1.25877	-1.19556		62	0	Female	Liver	Intrahepatic cholangiocarcinoma	T3N1M0	G1	4
46	-1.2856	-1.24529	-1.30248		62	0	Female	Liver	Intrahepatic cholangiocarcinoma	T3N1M0	G1	4
47	-1.08213	-1.14274	-0.982738		62	0	Female	Liver	Intrahepatic cholangiocarcinoma	T3N1M0	G1	4
48	-1.11257	-1.21591	-1.10204		62	0	Female	Liver	Intrahepatic cholangiocarcinoma	T3N1M0	G1	4
49	-1.68977	-1.27167	-1.61906		74	0	male	Liver	Intrahepatic cholangiocarcinoma	T3N1M0	G1	4
50	-1.69976	-1.31854	-1.63339		74	0	male	Liver	Intrahepatic cholangiocarcinoma	T3N1M0	G1	4
51	-1.01577	-0.8417	-1.32911		74	0	male	Liver	Intrahepatic cholangiocarcinoma	T3N1M0	G1	4
52	-2.07257	-1.96099	-1.95714		74	0	male	Liver	Intrahepatic cholangiocarcinoma	T3N1M0	G1	4
53	-1.06913	-1.00943	-0.521773		32	0	Female	Liver	Intrahepatic cholangiocarcinoma	T2N1M0	G1	4
54	0.177696	0.336816	0.313957		32	0	Female	Liver	Intrahepatic cholangiocarcinoma	T2N1M0	G1	4
55	0.119542	0.222788	0.278054		32	0	Female	Liver	Intrahepatic cholangiocarcinoma	T2N1M0	G1	4
56	0.0264402	0.142025	0.505824		32	0	Female	Liver	Intrahepatic cholangiocarcinoma	T2N1M0	G1	4
57	-1.30711	-0.965634	-1.30163		49	0	male	Liver	Intrahepatic cholangiocarcinoma	T2N1M0	G2	4
58	-1.46934	-1.11801	-1.2328		49	0	male	Liver	Intrahepatic cholangiocarcinoma	T2N1M0	G2	4
59	-0.748472	-0.570503	-1.0753		49	0	male	Liver	Intrahepatic cholangiocarcinoma	T2N1M0	G2	4
60	-1.05601	-0.759351	-1.2968		49	0	male	Liver	Intrahepatic cholangiocarcinoma	T2N1M0	G2	4
61	-0.81707	-0.39239	-0.846357		40	0	male	Liver	Intrahepatic cholangiocarcinoma	T2N1M0	G1	4
62	-1.20222	-0.828282	-1.16344		40	0	male	Liver	Intrahepatic cholangiocarcinoma	T2N1M0	G1	4
63	-1.50918	-1.10513	-1.04919		40	0	male	Liver	Intrahepatic cholangiocarcinoma	T2N1M0	G1	4
64	-0.930728	-0.492189	-0.83696		40	0	male	Liver	Intrahepatic cholangiocarcinoma	T2N1M0	G1	4
65	-0.749962	-0.472782	-0.538949		60	0	male	Liver	Intrahepatic cholangiocarcinoma	T3N1M0	G1	4
66	-0.883095	-0.620459	-0.870818		60	0	male	Liver	Intrahepatic cholangiocarcinoma	T3N1M0	G1	4
67	-0.891494	-0.559901	-0.922644		60	0	male	Liver	Intrahepatic cholangiocarcinoma	T3N1M0	G1	4
68	-0.961228	-0.66573	-0.679751		60	0	male	Liver	Intrahepatic cholangiocarcinoma	T3N1M0	G1	4
69	-1.37051	-0.827802	-0.735326		65	0	Female	Liver	Intrahepatic cholangiocarcinoma	T2N1M0	G1	4
70	-1.30025	-0.809387	-0.937863		65	0	Female	Liver	Intrahepatic cholangiocarcinoma	T2N1M0	G1	4
71	-1.53409	-1.1583	-0.921266		65	0	Female	Liver	Intrahepatic cholangiocarcinoma	T2N1M0	G1	4
72	-1.21749	-0.755203	-0.638625		65	0	Female	Liver	Intrahepatic cholangiocarcinoma	T2N1M0	G1	4
73	-0.279736	-0.366322	-0.758705		69	0	male	Liver	Intrahepatic cholangiocarcinoma	T3N1M0	G1	4
74	-0.23725	0.0500553	-0.283382		69	0	male	Liver	Intrahepatic cholangiocarcinoma	T3N1M0	G1	4
75	0.0670051	0.367989	-0.00487696		69	0	male	Liver	Intrahepatic cholangiocarcinoma	T3N1M0	G1	4
76	-0.18512	-0.0866131	-0.50487		69	0	male	Liver	Intrahepatic cholangiocarcinoma	T3N1M0	G1	4
77	-1.62734	-1.30365	-1.18164		39	0	Female	Liver	Intrahepatic cholangiocarcinoma	T3N1M0	G1	4
78	-1.46991	-1.15245	-1.12656		39	0	Female	Liver	Intrahepatic cholangiocarcinoma	T3N1M0	G1	4
79	-1.66178	-1.25677	-1.12701		39	0	Female	Liver	Intrahepatic cholangiocarcinoma	T3N1M0	G1	4
80	-1.88347	-1.41967	-1.26829		39	0	Female	Liver	Intrahepatic cholangiocarcinoma	T3N1M0	G1	4
81	-1.77141	-1.12176	-1.04893		70	0	Female	Liver	Intrahepatic cholangiocarcinoma	T3N1M0	G2	4
82	-1.96589	-1.35971	-1.25397		70	0	Female	Liver	Intrahepatic cholangiocarcinoma	T3N1M0	G2	4
83	-1.91455	-1.35311	-1.40122		70	0	Female	Liver	Intrahepatic cholangiocarcinoma	T3N1M0	G2	4
84	-1.88848	-1.31502	-1.33933		70	0	Female	Liver	Intrahepatic cholangiocarcinoma	T3N1M0	G2	4
85	-1.12887	-1.17525	-1.42273		55	0	Female	Liver	Intrahepatic cholangiocarcinoma	T2N1M0	G1	4
86	-1.23751	-1.47746	-1.55242		55	0	Female	Liver	Intrahepatic cholangiocarcinoma	T2N1M0	G1	4
87	-1.17768	-1.37525	-1.60355		55	0	Female	Liver	Intrahepatic cholangiocarcinoma	T2N1M0	G1	4
88	-0.943213	-0.947451	-1.29203		55	0	Female	Liver	Intrahepatic cholangiocarcinoma	T2N1M0	G1	4
89	-0.36495	-0.270139	-0.743228		73	0	male	Liver	Intrahepatic cholangiocarcinoma	T2N1M0	G2	4
90	-0.398657	-0.211662	-0.786867		73	0	male	Liver	Intrahepatic cholangiocarcinoma	T2N1M0	G2	4
91	-0.621146	-0.505204	-0.950997		73	0	male	Liver	Intrahepatic cholangiocarcinoma	T2N1M0	G2	4
92	-0.404356	-0.402899	-0.809264		73	0	male	Liver	Intrahepatic cholangiocarcinoma	T2N1M0	G2	4
93	-3.00374	-2.27542	-2.23767		51	0	male	Liver	Intrahepatic cholangiocarcinoma	T3N1M0	G0	4
94	-2.63501	-1.9583	-2.06535		51	0	male	Liver	Intrahepatic cholangiocarcinoma	T3N1M0	G0	4
95	-2.85175	-2.2185	-2.33288		51	0	male	Liver	Intrahepatic cholangiocarcinoma	T3N1M0	G0	4
96	-2.74201	-2.11628	-2.23139		51	0	male	Liver	Intrahepatic cholangiocarcinoma	T3N1M0	G0	4
97	0.020407	0.338508	-0.651414		69	0	Female	Liver	Intrahepatic cholangiocarcinoma	T2N1M0	G2	4
98	-0.489875	-0.118809	-0.775435		69	0	Female	Liver	Intrahepatic cholangiocarcinoma	T2N1M0	G2	4
99	-0.265291	0.0781375	-0.697667		69	0	Female	Liver	Intrahepatic cholangiocarcinoma	T2N1M0	G2	4
100	-1.08744	-0.379655	-0.828954		69	0	Female	Liver	Intrahepatic cholangiocarcinoma	T2N1M0	G2	4
101	-0.975668	-0.651866	-0.494687		63	0	male	Liver	Intrahepatic cholangiocarcinoma	T2N1M0	G2	4
102	-0.919547	-0.585927	-0.558885		63	0	male	Liver	Intrahepatic cholangiocarcinoma	T2N1M0	G2	4
103	-1.77242	-1.44585	-1.28786		63	0	male	Liver	Intrahepatic cholangiocarcinoma	T2N1M0	G2	4
104	-1.32038	-1.01818	-1.07372		63	0	male	Liver	Intrahepatic cholangiocarcinoma	T2N1M0	G2	4
105	-1.03653	-0.636344	-0.505672		67	0	Female	Liver	Intrahepatic cholangiocarcinoma	T3N1M0	G2	4
106	-0.942114	-0.563721	-0.636855		67	0	Female	Liver	Intrahepatic cholangiocarcinoma	T3N1M0	G2	4
107	-1.08415	-0.671822	-0.603199		67	0	Female	Liver	Intrahepatic cholangiocarcinoma	T3N1M0	G2	4
108	-1.26068	-0.857015	-0.802407		67	0	Female	Liver	Intrahepatic cholangiocarcinoma	T3N1M0	G2	4
109	-0.883591	-0.571748	-0.765855		46	0	Female	Liver	Intrahepatic cholangiocarcinoma	T2N1M0	G2	4
110	-0.170142	0.0468486	0.412106		46	0	Female	Liver	Intrahepatic cholangiocarcinoma	T2N1M0	G2	4
111	0.212936	0.493398	0.686343		46	0	Female	Liver	Intrahepatic cholangiocarcinoma	T2N1M0	G2	4
112	-1.14277	-1.19081	-1.2027		54	0	male	Liver	Intrahepatic cholangiocarcinoma	T3N1M0	G2	4
113	-1.47897	-1.22879	-1.14437		54	0	male	Liver	Intrahepatic cholangiocarcinoma	T3N1M0	G2	4
114	-1.27917	-1.35425	-1.21116		54	0	male	Liver	Intrahepatic cholangiocarcinoma	T3N1M0	G2	4
115	-1.159	-1.22401	-1.21139		54	0	male	Liver	Intrahepatic cholangiocarcinoma	T3N1M0	G2	4
116	-0.520291	-0.583874	-0.0441826		68	0	male	Liver	Intrahepatic cholangiocarcinoma	T3N1M0	G0	4
117	-0.861941	-0.629481	-0.0794803		68	0	male	Liver	Intrahepatic cholangiocarcinoma	T3N1M0	G0	4
118	-0.581708	-0.491455	0.0432405		68	0	male	Liver	Intrahepatic cholangiocarcinoma	T3N1M0	G0	4
119	-0.415402	-0.394936	0.0604887		68	0	male	Liver	Intrahepatic cholangiocarcinoma	T3N1M0	G0	4
120	-0.382831	0.0160396	0.373966		54	0	Female	Liver	Intrahepatic cholangiocarcinoma	T3N1M0	G2	4
121	-0.689346	-0.215865	0.307687		54	0	Female	Liver	Intrahepatic cholangiocarcinoma	T3N1M0	G2	4
122	-0.628544	-0.147593	0.0485334		54	0	Female	Liver	Intrahepatic cholangiocarcinoma	T3N1M0	G2	4
123	-0.75994	-0.35534	0.0472007		54	0	Female	Liver	Intrahepatic cholangiocarcinoma	T3N1M0	G2	4
124	-0.662553	-0.219944	-0.274046		51	0	Female	Liver	Intrahepatic cholangiocarcinoma	T3N1M0	G0	4
125	-0.729995	-0.252762	-0.357023		51	0	Female	Liver	Intrahepatic cholangiocarcinoma	T3N1M0	G0	4
126	-1.25262	-0.818439	-0.701031		51	0	Female	Liver	Intrahepatic cholangiocarcinoma	T3N1M0	G0	4
127	-0.534101	-0.0461432	0.124819		51	0	Female	Liver	Intrahepatic cholangiocarcinoma	T3N1M0	G0	4
128	-0.298864	0.432682	0.447649		52	0	male	Liver	Intrahepatic cholangiocarcinoma	T2N1M0	G2	4
129	-0.280328	0.348161	0.394932		52	0	male	Liver	Intrahepatic cholangiocarcinoma	T2N1M0	G2	4
130	-0.34194	0.339797	0.404123		52	0	male	Liver	Intrahepatic cholangiocarcinoma	T2N1M0	G2	4
131	-0.504781	0.210722	0.32287		52	0	male	Liver	Intrahepatic cholangiocarcinoma	T2N1M0	G2	4
132	-0.0169508	0.751463	0.672019		52	0	male	Liver	Intrahepatic cholangiocarcinoma	T3N1M0	G3	4
133	-0.172467	0.446141	0.206092		52	0	male	Liver	Intrahepatic cholangiocarcinoma	T3N1M0	G3	4
134	-0.306666	0.34189	0.40346		52	0	male	Liver	Intrahepatic cholangiocarcinoma	T3N1M0	G3	4
135	-0.18816	0.495749	0.644304		52	0	male	Liver	Intrahepatic cholangiocarcinoma	T3N1M0	G3	4
136	-0.682904	-0.217251	-0.638957		67	0	male	Liver	Intrahepatic cholangiocarcinoma	T3N1M0	G2	4
137	-0.795739	-0.286452	-0.538755		67	0	male	Liver	Intrahepatic cholangiocarcinoma	T3N1M0	G2	4
138	-0.654552	-0.147921	-0.347997		67	0	male	Liver	Intrahepatic cholangiocarcinoma	T3N1M0	G2	4
139	-0.480824	-0.00449819	-0.272226		67	0	male	Liver	Intrahepatic cholangiocarcinoma	T3N1M0	G2	4
140	-0.783906	-0.407489	-0.665784		65	0	male	Liver	Intrahepatic cholangiocarcinoma	T3N1M0	G2	4
141	-0.752246	-0.308534	-0.452147		65	0	male	Liver	Intrahepatic cholangiocarcinoma	T3N1M0	G2	4
142	-1.21991	-0.774049	-0.259004		60	0	male	Liver	Intrahepatic cholangiocarcinoma	T2N1M0	G3	4
143	-1.16538	-0.690702	-0.00316775		60	0	male	Liver	Intrahepatic cholangiocarcinoma	T2N1M0	G3	4
144	-0.922311	-0.458711	0.32449		60	0	male	Liver	Intrahepatic cholangiocarcinoma	T2N1M0	G3	4
145	-1.07547	-0.618104	0.0729786		60	0	male	Liver	Intrahepatic cholangiocarcinoma	T2N1M0	G3	4
146	0.379585	0.951623	0.708632		50	0	Female	Liver	Intrahepatic cholangiocarcinoma	T3N1M0	G2	4
147	0.62879	1.19683	0.948024		50	0	Female	Liver	Intrahepatic cholangiocarcinoma	T3N1M0	G2	4
148	0.400734	0.967964	0.821553		50	0	Female	Liver	Intrahepatic cholangiocarcinoma	T3N1M0	G2	4
149	0.347453	0.955347	0.68012		50	0	Female	Liver	Intrahepatic cholangiocarcinoma	T3N1M0	G2	4
150	-0.104656	0.368935	0.533501		49	0	male	Liver	Intrahepatic cholangiocarcinoma	T2N1M0	G3	4
151	0.0408234	0.583144	0.764775		49	0	male	Liver	Intrahepatic cholangiocarcinoma	T2N1M0	G3	4
152	-0.337301	0.304813	0.756768		49	0	male	Liver	Intrahepatic cholangiocarcinoma	T2N1M0	G3	4
153	-0.261845	0.274619	0.606507		49	0	male	Liver	Intrahepatic cholangiocarcinoma	T2N1M0	G3	4
154	-0.728802	-0.459011	-0.240229		64	0	male	Liver	Intrahepatic cholangiocarcinoma	T3N1M0	G2	4
155	-0.380216	-0.0773102	0.0529582		64	0	male	Liver	Intrahepatic cholangiocarcinoma	T3N1M0	G2	4
156	-0.479318	-0.11361	0.0026826		64	0	male	Liver	Intrahepatic cholangiocarcinoma	T3N1M0	G2	4
157	-0.367969	-0.0430062	-0.142189		64	0	male	Liver	Intrahepatic cholangiocarcinoma	T3N1M0	G2	4
158	0.176908	0.447995	0.581562		63	0	male	Liver	Intrahepatic cholangiocarcinoma	T3N1M0	G3	4
159	-0.337407	-0.0835484	0.438682		63	0	male	Liver	Intrahepatic cholangiocarcinoma	T3N1M0	G3	4
160	0.169858	0.351058	0.503275		63	0	male	Liver	Intrahepatic cholangiocarcinoma	T3N1M0	G3	4
161	0.351164	0.547623	0.404413		63	0	male	Liver	Intrahepatic cholangiocarcinoma	T3N1M0	G3	4
162	-1.17913	-0.673926	-0.303712		45	0	male	Liver	Intrahepatic cholangiocarcinoma	T3N1M0	G3	4
163	-1.11571	-0.652453	-0.252348		45	0	male	Liver	Intrahepatic cholangiocarcinoma	T3N1M0	G3	4
164	-1.29412	-0.829142	-0.291015		45	0	male	Liver	Intrahepatic cholangiocarcinoma	T3N1M0	G3	4
165	-1.23888	-0.781068	-0.31741		45	0	male	Liver	Intrahepatic cholangiocarcinoma	T3N1M0	G3	4
166	-1.99384	-1.28849	-1.03491		51	0	male	Liver	Intrahepatic cholangiocarcinoma	T3N1M0	G3	4
167	-1.56619	-0.828211	-0.57749		51	0	male	Liver	Intrahepatic cholangiocarcinoma	T3N1M0	G3	4
168	-1.50307	-0.793539	-0.589562		51	0	male	Liver	Intrahepatic cholangiocarcinoma	T3N1M0	G3	4
169	-0.736077	-0.274119	-0.317043		68	0	male	Liver	Intrahepatic cholangiocarcinoma	T3N1M0	G3	4
170	-0.790875	-0.193202	-0.144269		68	0	male	Liver	Intrahepatic cholangiocarcinoma	T3N1M0	G3	4
171	-0.477701	0.144462	-0.110404		68	0	male	Liver	Intrahepatic cholangiocarcinoma	T3N1M0	G3	4
172	-0.750809	-0.1591	-0.271054		68	0	male	Liver	Intrahepatic cholangiocarcinoma	T3N1M0	G3	4
173	0.0209419	0.242088	0.449241		34	0	male	Liver	Intrahepatic cholangiocarcinoma	T2N1M0	G0	4
174	0.11943	0.479873	0.491314		34	0	male	Liver	Intrahepatic cholangiocarcinoma	T2N1M0	G0	4
175	0.278684	0.592935	0.638841		34	0	male	Liver	Intrahepatic cholangiocarcinoma	T2N1M0	G0	4
176	0.408435	0.644197	0.643442		34	0	male	Liver	Intrahepatic cholangiocarcinoma	T2N1M0	G0	4
177	-0.511594	0.00937302	0.194435		65	0	male	Liver	Intrahepatic cholangiocarcinoma	T2N1M0	G0	4
178	-0.509779	0.00330747	0.0872584		65	0	male	Liver	Intrahepatic cholangiocarcinoma	T2N1M0	G0	4
179	-0.454465	0.0471346	0.161893		65	0	male	Liver	Intrahepatic cholangiocarcinoma	T2N1M0	G0	4
180	-0.436147	-0.00381318	0.311912		65	0	male	Liver	Intrahepatic cholangiocarcinoma	T2N1M0	G0	4
181	-0.0391352	0.660003	0.248223		70	0	Female	Liver	Intrahepatic cholangiocarcinoma	T3N1M0	G3	4
182	-0.401351	0.436957	0.412349		70	0	Female	Liver	Intrahepatic cholangiocarcinoma	T3N1M0	G3	4
183	-0.237354	0.49776	0.280818		70	0	Female	Liver	Intrahepatic cholangiocarcinoma	T3N1M0	G3	4
184	-0.541719	0.316268	0.289806		70	0	Female	Liver	Intrahepatic cholangiocarcinoma	T3N1M0	G3	4
185	-0.378428	0.320202	0.050342		47	0	Female	Liver	Intrahepatic cholangiocarcinoma	T2N1M0	G3	4
186	-0.512958	0.183766	0.0351537		47	0	Female	Liver	Intrahepatic cholangiocarcinoma	T2N1M0	G3	4
187	-0.0247795	0.535751	0.412266		47	0	Female	Liver	Intrahepatic cholangiocarcinoma	T2N1M0	G3	4
188	-0.100778	0.456976	0.224346		47	0	Female	Liver	Intrahepatic cholangiocarcinoma	T2N1M0	G3	4
189	-1.25795	-0.668781	-0.493711		60	0	Female	Liver	Intrahepatic cholangiocarcinoma	T3N1M0	G0	4
190	-1.32682	-0.892724	-0.58585		60	0	Female	Liver	Intrahepatic cholangiocarcinoma	T3N1M0	G0	4
191	-1.29739	-1.01189	-0.654258		60	0	Female	Liver	Intrahepatic cholangiocarcinoma	T3N1M0	G0	4
192	-1.20224	-0.767151	-0.531593		60	0	Female	Liver	Intrahepatic cholangiocarcinoma	T3N1M0	G0	4
193	-0.317608	-0.174196	-0.272406		57	0	Female	Liver	Intrahepatic cholangiocarcinoma	T2N1M0	G2	4
194	-0.140027	-0.0122391	-0.225794		57	0	Female	Liver	Intrahepatic cholangiocarcinoma	T2N1M0	G2	4
195	-0.452174	-0.476847	-0.482152		57	0	Female	Liver	Intrahepatic cholangiocarcinoma	T2N1M0	G2	4
196	-0.39694	-0.394431	-0.384838		57	0	Female	Liver	Intrahepatic cholangiocarcinoma	T2N1M0	G2	4
197	-0.190615	0.0570749	0.398206		52	0	Female	Liver	Intrahepatic cholangiocarcinoma	T3N1M0	G3	4
198	0.687722	1.09415	0.918659		52	0	Female	Liver	Intrahepatic cholangiocarcinoma	T3N1M0	G3	4
199	0.518705	0.785723	0.732572		52	0	Female	Liver	Intrahepatic cholangiocarcinoma	T3N1M0	G3	4
200	0.598586	0.863408	0.889422		52	0	Female	Liver	Intrahepatic cholangiocarcinoma	T3N1M0	G3	4
201	-0.146463	0.375036	0.217066		36	0	Female	Liver	Intrahepatic cholangiocarcinoma	T2N1M0	G3	4
202	-0.0348756	0.768642	0.667274		36	0	Female	Liver	Intrahepatic cholangiocarcinoma	T2N1M0	G3	4
203	0.157492	1.03265	0.726974		36	0	Female	Liver	Intrahepatic cholangiocarcinoma	T2N1M0	G3	4
204	-0.276255	0.21775	0.208758		36	0	Female	Liver	Intrahepatic cholangiocarcinoma	T2N1M0	G3	4
205	-0.511733	0.357887	0.840653		69	0	male	Liver	Hepatocellular carcinoma	T3N1M0	G3	4
206	-0.641992	0.338521	0.883833		69	0	male	Liver	Hepatocellular carcinoma	T3N1M0	G3	4
207	-0.556506	0.418128	0.940784		69	0	male	Liver	Hepatocellular carcinoma	T3N1M0	G3	4
208	-0.224685	0.6918	0.731919		69	0	male	Liver	Hepatocellular carcinoma	T3N1M0	G3	4
209	-0.708726	0.200857	0.315486		52	0	male	Liver	Hepatocellular carcinoma	T3N1M0	G2	4
210	-0.728074	-0.0275235	0.279685		52	0	male	Liver	Hepatocellular carcinoma	T3N1M0	G2	4
211	-0.850746	-0.254529	-0.0504308		52	0	male	Liver	Hepatocellular carcinoma	T3N1M0	G2	4
212	-0.256628	0.349887	0.568347		52	0	male	Liver	Hepatocellular carcinoma	T3N1M0	G2	4
213	-0.725666	-0.501939	-0.187502		61	0	male	Liver	Hepatocellular carcinoma	T3N1M0	G2	4
214	-0.158989	0.187823	-0.0178229		61	0	male	Liver	Hepatocellular carcinoma	T3N1M0	G2	4
215	-0.303318	0.110189	-0.399067		61	0	male	Liver	Hepatocellular carcinoma	T3N1M0	G2	4
216	-0.397847	-0.0825443	-0.283356		61	0	male	Liver	Hepatocellular carcinoma	T3N1M0	G2	4
217	0.0317408	0.420835	0.539786		76	0	male	Liver	Hepatocellular carcinoma	T3N1M0	G2	4
218	0.263536	0.73229	0.611218		76	0	male	Liver	Hepatocellular carcinoma	T3N1M0	G2	4
219	0.159938	0.61107	0.415245		76	0	male	Liver	Hepatocellular carcinoma	T3N1M0	G2	4
220	0.339538	0.675571	0.352967		76	0	male	Liver	Hepatocellular carcinoma	T3N1M0	G2	4
221	0.620564	1.04394	0.865851		57	0	male	Liver	Hepatocellular carcinoma	T3N1M0	G3	4
222	0.824716	1.32222	1.01667		57	0	male	Liver	Hepatocellular carcinoma	T3N1M0	G3	4
223	0.824715	1.30529	0.926707		57	0	male	Liver	Hepatocellular carcinoma	T3N1M0	G3	4
224	0.797097	1.11591	0.790642		57	0	male	Liver	Hepatocellular carcinoma	T3N1M0	G3	4
225	0.416692	0.964617	0.454836		40	0	male	Liver	Hepatocellular carcinoma	T3N1M0	G2	4
226	0.382281	0.951848	0.53866		40	0	male	Liver	Hepatocellular carcinoma	T3N1M0	G2	4
227	0.219563	0.852865	0.320567		40	0	male	Liver	Hepatocellular carcinoma	T3N1M0	G2	4
228	0.349386	0.969362	0.402253		40	0	male	Liver	Hepatocellular carcinoma	T3N1M0	G2	4
229	-1.46746	-0.667608	-0.384463		64	0	male	Liver	Hepatocellular carcinoma	T3N1M0	G2	4
230	-1.8876	-1.08641	-0.575156		64	0	male	Liver	Hepatocellular carcinoma	T3N1M0	G2	4
231	-1.03557	-0.272581	0.104357		64	0	male	Liver	Hepatocellular carcinoma	T3N1M0	G2	4
232	-1.12466	-0.339906	-0.160143		64	0	male	Liver	Hepatocellular carcinoma	T3N1M0	G2	4
233	-0.149586	0.380513	0.373071		52	0	male	Liver	Hepatocellular carcinoma	T3N1M0	G3	4
234	-0.319372	0.179529	0.339262		52	0	male	Liver	Hepatocellular carcinoma	T3N1M0	G3	4
235	-0.199441	0.374125	0.696933		52	0	male	Liver	Hepatocellular carcinoma	T3N1M0	G3	4
236	-0.233308	0.329098	0.445533		52	0	male	Liver	Hepatocellular carcinoma	T3N1M0	G3	4
237	-1.24513	-0.892829	-0.879649		52	0	male	Liver	Hepatocellular carcinoma	T3N1M0	G3	4
238	-1.59352	-1.03772	-0.820584		52	0	male	Liver	Hepatocellular carcinoma	T3N1M0	G3	4
239	-1.38331	-0.900607	-0.7238		52	0	male	Liver	Hepatocellular carcinoma	T3N1M0	G3	4
240	-1.00909	-0.789604	-0.750142		52	0	male	Liver	Hepatocellular carcinoma	T3N1M0	G3	4
241	0.21903	0.816032	0.543979		69	0	Female	Liver	Hepatocellular carcinoma	T4N1M0	G2	4
242	0.0361021	0.698118	0.719209		69	0	Female	Liver	Hepatocellular carcinoma	T4N1M0	G2	4
243	0.174251	0.70267	0.646818		69	0	Female	Liver	Hepatocellular carcinoma	T4N1M0	G2	4
244	0.44546	1.00099	0.791939		69	0	Female	Liver	Hepatocellular carcinoma	T4N1M0	G2	4
245	-0.270569	0.209614	0.188763		36	0	male	Liver	Hepatocellular carcinoma	T3N1M0	G2	4
246	-0.47259	-0.0882639	0.0541208		36	0	male	Liver	Hepatocellular carcinoma	T3N1M0	G2	4
247	-0.303477	0.159986	0.240819		36	0	male	Liver	Hepatocellular carcinoma	T3N1M0	G2	4
248	-0.201229	0.268395	0.322838		36	0	male	Liver	Hepatocellular carcinoma	T3N1M0	G2	4
249	-0.452518	-0.170965	0.180726		56	0	male	Liver	Hepatocellular carcinoma	T2N1M0	G2	4
250	-0.340848	0.0244397	0.0772491		56	0	male	Liver	Hepatocellular carcinoma	T2N1M0	G2	4
251	-0.215433	0.167246	0.196048		56	0	male	Liver	Hepatocellular carcinoma	T2N1M0	G2	4
252	-0.249089	0.137065	0.0910034		56	0	male	Liver	Hepatocellular carcinoma	T2N1M0	G2	4
253	-1.38949	-0.668317	-0.256032		27	0	male	Liver	Hepatocellular carcinoma	T3N1M0	G2	4
254	-0.99241	-0.259966	0.125051		27	0	male	Liver	Hepatocellular carcinoma	T3N1M0	G2	4
255	-1.10611	-0.398714	0.0938659		27	0	male	Liver	Hepatocellular carcinoma	T3N1M0	G2	4
256	-1.19054	-0.768567	-0.271658		37	0	male	Liver	Hepatocellular carcinoma	T4N1M0	G3	4
257	-1.03813	-0.642466	-0.145607		37	0	male	Liver	Hepatocellular carcinoma	T4N1M0	G3	4
258	-0.717332	-0.209413	0.0830765		37	0	male	Liver	Hepatocellular carcinoma	T4N1M0	G3	4
259	-0.758617	-0.239421	0.126098		37	0	male	Liver	Hepatocellular carcinoma	T4N1M0	G3	4
260	-0.860289	-0.385867	-0.0226166		64	0	male	Liver	Hepatocellular carcinoma	T2N1M0	G2	4
261	-1.13488	-0.541936	0.0397426		64	0	male	Liver	Hepatocellular carcinoma	T2N1M0	G2	4
262	-1.06586	-0.577107	0.141234		64	0	male	Liver	Hepatocellular carcinoma	T2N1M0	G2	4
263	-0.951901	-0.476269	0.178745		64	0	male	Liver	Hepatocellular carcinoma	T2N1M0	G2	4
264	0.00209402	0.505528	0.197962		34	0	male	Liver	Cirrhosis	T3N1M0	G0	4
265	-0.390863	0.255073	0.0783284		34	0	male	Liver	Cirrhosis	T3N1M0	G0	4
266	-0.0266019	0.627504	-0.0846975		34	0	male	Liver	Cirrhosis	T3N1M0	G0	4
267	-0.0741305	0.508143	0.141049		34	0	male	Liver	Cirrhosis	T3N1M0	G0	4
268	-0.291177	0.235133	0.309633		61	0	Female	Liver	Cirrhosis	T2N1M0	G0	4
269	-0.974337	-0.417792	0.140164		61	0	Female	Liver	Cirrhosis	T2N1M0	G0	4
270	-0.763627	-0.118714	0.234864		61	0	Female	Liver	Cirrhosis	T2N1M0	G0	4
271	-0.990909	-0.311021	0.0897714		61	0	Female	Liver	Cirrhosis	T2N1M0	G0	4
272	-0.822406	-0.102583	0.23221		63	0	male	Liver	Cirrhosis	T2N1M0	G0	4
273	-0.829782	-0.0467436	0.238602		63	0	male	Liver	Cirrhosis	T2N1M0	G0	4
274	-0.845043	-0.112887	0.15291		63	0	male	Liver	Cirrhosis	T2N1M0	G0	4
275	-0.421801	0.299123	0.330488		63	0	male	Liver	Cirrhosis	T2N1M0	G0	4
276	-0.867431	-0.402775	-0.18211		52	0	Female	Liver	Cirrhosis	T3N1M0	G0	4
277	-1.1406	-0.676421	-0.284981		52	0	Female	Liver	Cirrhosis	T3N1M0	G0	4
278	-1.35251	-0.785023	-0.523238		52	0	Female	Liver	Cirrhosis	T3N1M0	G0	4
279	-0.814163	-0.317491	-0.19019		52	0	Female	Liver	Cirrhosis	T3N1M0	G0	4
280	0.579392	0.964636	1.04137		30	0	male	Liver	Carcinoid
281	0.630897	1.06843	1.17888		30	0	male	Liver	Carcinoid
282	0.0888168	0.531857	1.00926		30	0	male	Liver	Carcinoid
283	0.443144	0.869664	0.955488		30	0	male	Liver	Carcinoid
284	-0.224017	0.340723	0.557976		37	0	Female	Liver	Carcinoid
285	-0.0252062	0.485571	0.796266		37	0	Female	Liver	Carcinoid
286	0.0391626	0.585278	1.11307		37	0	Female	Liver	Carcinoid
287	-0.0911011	0.486956	0.931574		37	0	Female	Liver	Carcinoid
288	-0.352606	0.246315	0.233328		56	0	male	Liver	Adenosquamous carcinoma	T3N1M0	G0	4
289	-0.441836	0.135818	0.201391		56	0	male	Liver	Adenosquamous carcinoma	T3N1M0	G0	4
290	-0.16185	0.328029	0.423621		56	0	male	Liver	Adenosquamous carcinoma	T3N1M0	G0	4
291	-0.39428	0.226545	0.207221		56	0	male	Liver	Adenosquamous carcinoma	T3N1M0	G0	4
292	-0.708971	-0.314171	-0.0223006		58	0	Female	Liver	Adenosquamous carcinoma	T3N1M0	G0	4
293	-0.814665	-0.490888	-0.352089		58	0	Female	Liver	Adenosquamous carcinoma	T3N1M0	G0	4
294	-0.872867	-0.433208	-0.152071		58	0	Female	Liver	Adenosquamous carcinoma	T3N1M0	G0	4
295	-0.872867	-0.433208	-0.152071		58	0	Female	Liver	Adenosquamous carcinoma	T3N1M0	G0	4
296	-0.428693	-0.0294725	0.184507		75	0	Female	Liver	Hepatocellular carcinoma	T3N1M0	G2	4
297	-0.107503	0.305984	0.378755		75	0	Female	Liver	Hepatocellular carcinoma	T3N1M0	G2	4
298	-0.271791	0.129271	0.219786		75	0	Female	Liver	Hepatocellular carcinoma	T3N1M0	G2	4
299	0.150422	0.580641	0.4724		75	0	Female	Liver	Hepatocellular carcinoma	T3N1M0	G2	4
300	0.512796	0.132533	0.430771		52	0	Female	Liver	Hepatocellular carcinoma	T3N1M0	G2	4
301	0.279918	0.293973	0.267256		52	0	Female	Liver	Hepatocellular carcinoma	T3N1M0	G2	4
302	0.143686	0.0115808	0.233406		52	0	Female	Liver	Hepatocellular carcinoma	T3N1M0	G2	4
303	0.228062	-0.0391764	0.57035		52	0	Female	Liver	Hepatocellular carcinoma	T3N1M0	G2	4
304	-0.311033	0.276047	0.211142		56	0	male	Liver	Intrahepatic cholangiocarcinoma	T3N0M1	G2	4
305	-0.275881	0.195217	0.108422		56	0	male	Liver	Intrahepatic cholangiocarcinoma	T3N0M1	G2	4
306	-0.275259	0.488151	0.314106		56	0	male	Liver	Intrahepatic cholangiocarcinoma	T3N0M1	G2	4
307	-0.324624	0.366867	0.138058		56	0	male	Liver	Intrahepatic cholangiocarcinoma	T3N0M1	G2	4
308	-0.0814226	0.668474	0.250567		56	0	male	Liver	Intrahepatic cholangiocarcinoma	T3N0M1	G2	4
309	0.0297471	0.642587	0.23633		56	0	male	Liver	Intrahepatic cholangiocarcinoma	T3N0M1	G2	4
310	-0.103019	0.555378	0.220266		56	0	male	Liver	Intrahepatic cholangiocarcinoma	T3N0M1	G2	4
311	-0.0339368	0.736951	0.218976		56	0	male	Liver	Intrahepatic cholangiocarcinoma	T3N0M1	G2	4
312	-0.809894	-0.278616	-0.529284		54	0	Female	Liver	Intrahepatic cholangiocarcinoma	T3N1M0	G2	4
313	-0.711327	-0.191654	-0.212638		54	0	Female	Liver	Intrahepatic cholangiocarcinoma	T3N1M0	G2	4
314	-0.878994	-0.330153	-0.231641		54	0	Female	Liver	Intrahepatic cholangiocarcinoma	T3N1M0	G2	4
315	-0.694777	-0.139509	-0.617998		54	0	Female	Liver	Intrahepatic cholangiocarcinoma	T3N1M0	G2	4
316	-0.936087	-0.357109	-0.0226936		54	0	Female	Liver	Intrahepatic cholangiocarcinoma	T3N1M0	G2	4
317	-0.582746	0.11008	-0.229782		54	0	Female	Liver	Intrahepatic cholangiocarcinoma	T3N1M0	G2	4
318	-0.736733	-0.139628	-0.391194		54	0	Female	Liver	Intrahepatic cholangiocarcinoma	T3N1M0	G2	4
319	-0.932272	-0.351129	-0.148379		54	0	Female	Liver	Intrahepatic cholangiocarcinoma	T3N1M0	G2	4
320	0.684748	1.36163	0.80137		57	0	male	Liver	Hepatocellular carcinoma	T4N1M1	G2	4
321	0.258603	0.994338	0.622097		57	0	male	Liver	Hepatocellular carcinoma	T4N1M1	G2	4
322	-0.103861	0.675972	0.523213		57	0	male	Liver	Hepatocellular carcinoma	T4N1M1	G2	4
323	-0.211449	0.561875	0.486219		57	0	male	Liver	Hepatocellular carcinoma	T4N1M1	G2	4
324	0.134468	0.772887	0.400359		57	0	male	Liver	Hepatocellular carcinoma	T4N1M1	G2	4
325	-0.347914	0.374113	0.141531		57	0	male	Liver	Hepatocellular carcinoma	T4N1M1	G2	4
326	0.231152	0.853126	0.467002		57	0	male	Liver	Hepatocellular carcinoma	T4N1M1	G2	4
327	-0.0294035	0.616885	0.166693		57	0	male	Liver	Hepatocellular carcinoma	T4N1M1	G2	4
328	-1.31883	-0.697587		-0.207223	67	0	Female	Liver	Cancer adjacent liver tissue
329	-0.866456	-0.194098		0.226347	67	0	Female	Liver	Cancer adjacent liver tissue
330	-0.16296	0.460944		0.785497	67	0	Female	Liver	Cancer adjacent liver tissue
331	-0.857824	-0.221532		0.213608	67	0	Female	Liver	Cancer adjacent liver tissue
332	-0.819564	-0.488577		-0.493091	75	0	Female	Liver	Cancer adjacent liver tissue
333	-1.2069	-0.852596		-0.908454	75	0	Female	Liver	Cancer adjacent liver tissue
334	-0.720516	-0.248725		-0.108312	75	0	Female	Liver	Cancer adjacent liver tissue
335	-0.747274	-0.252413		-0.159429	75	0	Female	Liver	Cancer adjacent liver tissue
336	-1.01489	-0.559615		-0.12553	56	1	male	Liver	Cancer adjacent liver tissue
337	-1.00266	-0.55857		-0.181573	56	1	male	Liver	Cancer adjacent liver tissue
338	-0.866211	-0.217149		-0.00762575	56	1	male	Liver	Cancer adjacent liver tissue
339	-0.0469699	0.647873		0.649767	56	1	male	Liver	Cancer adjacent liver tissue
340	-0.857276	-0.547671		-0.714071	51	0	Female	Liver	Cancer adjacent liver tissue
341	-0.286889	0.0764425		0.14894	51	0	Female	Liver	Cancer adjacent liver tissue
342	-0.399922	-0.0908817		-0.0373008	51	0	Female	Liver	Cancer adjacent liver tissue
343	-0.306554	0.0513624		-0.166674	51	0	Female	Liver	Cancer adjacent liver tissue
344	0.536729	0.748297		0.0178792	52	0	Female	Liver	Cancer adjacent liver tissue
345	0.391273	0.805993		0.129212	52	0	Female	Liver	Cancer adjacent liver tissue
346	0.0998156	0.5287		0.186752	52	0	Female	Liver	Cancer adjacent liver tissue
347	-0.325817	-0.0612391		-0.278917	52	0	Female	Liver	Cancer adjacent liver tissue
348	-0.19359	-0.201522		0.0922548	56	0	Female	Liver	Intrahepatic cholangiocarcinoma	T2N0M0	G2	2
349	0.212207	0.305839		0.303139	56	0	Female	Liver	Intrahepatic cholangiocarcinoma	T2N0M0	G2	2
350	0.152593	0.255286		0.226043	56	0	Female	Liver	Intrahepatic cholangiocarcinoma	T2N0M0	G2	2
351	-0.236334	-0.0273488		0.101686	56	0	Female	Liver	Intrahepatic cholangiocarcinoma	T2N0M0	G2	2
352	-1.77516	-1.66261		-1.36528	59	0	Female	Liver	Intrahepatic cholangiocarcinoma	T3N0M0	G2	3
353	-1.23202	-1.43349		-1.52376	59	0	Female	Liver	Intrahepatic cholangiocarcinoma	T3N0M0	G2	3
354	-1.25893	-1.26951		-1.24765	59	0	Female	Liver	Intrahepatic cholangiocarcinoma	T3N0M0	G2	3
355	-0.881881	-0.847545		-0.918682	59	0	Female	Liver	Intrahepatic cholangiocarcinoma	T3N0M0	G2	3
356	-0.165793	-0.453627		-0.495479	64	1	male	Liver	Intrahepatic cholangiocarcinoma	T2N0M0	G3	2
357	-0.106937	-0.2962		-0.263084	64	1	male	Liver	Intrahepatic cholangiocarcinoma	T2N0M0	G3	2
358	-0.33742	-0.711424		-0.885946	64	1	male	Liver	Intrahepatic cholangiocarcinoma	T2N0M0	G3	2
359	0.229808	-0.0868075		-0.202761	64	1	male	Liver	Intrahepatic cholangiocarcinoma	T2N0M0	G3	2
360	-0.237266	0.135194		0.625338	49	1	male	Liver	Intrahepatic cholangiocarcinoma	T2N0M0	G3	2
361	-0.459097	0.0349489		0.799367	49	1	male	Liver	Intrahepatic cholangiocarcinoma	T2N0M0	G3	2
362	-0.88755	-0.429426		0.661536	49	1	male	Liver	Intrahepatic cholangiocarcinoma	T2N0M0	G3	2
363	-0.813605	-0.353145		0.689791	49	1	male	Liver	Intrahepatic cholangiocarcinoma	T2N0M0	G3	2
364	0.493311	0.310749		-0.675998	56	1	male	Liver	Hepatocellular carcinoma	T3N0M0	G2	3
365	0.243696	0.143203		-0.477752	56	1	male	Liver	Hepatocellular carcinoma	T3N0M0	G2	3
366	0.332729	0.376668		-0.385088	56	1	male	Liver	Hepatocellular carcinoma	T3N0M0	G2	3
367	0.396167	0.314999		-0.450781	56	1	male	Liver	Hepatocellular carcinoma	T3N0M0	G2	3
368	-0.591027	-0.521742		-0.106032	55	1	male	Liver	Intrahepatic cholangiocarcinoma	T3N1M0	G1	4
369	-1.09888	-0.889246		-0.0552645	55	1	male	Liver	Intrahepatic cholangiocarcinoma	T3N1M0	G1	4
370	-0.776332	-0.552869		-0.105672	55	1	male	Liver	Intrahepatic cholangiocarcinoma	T3N1M0	G1	4
371	-1.14366	-0.728503		0.0777049	55	1	male	Liver	Intrahepatic cholangiocarcinoma	T3N1M0	G1	4
372	-0.178661	0.0143871		-0.404836	62	0	Female	Liver	Intrahepatic cholangiocarcinoma	T3N1M0	G1	4
373	-0.592084	-0.2623		-0.149592	62	0	Female	Liver	Intrahepatic cholangiocarcinoma	T3N1M0	G1	4
374	-0.118343	0.0585888		0.0431936	62	0	Female	Liver	Intrahepatic cholangiocarcinoma	T3N1M0	G1	4
375	-0.37746	-0.129586		-0.480104	62	0	Female	Liver	Intrahepatic cholangiocarcinoma	T3N1M0	G1	4
376	-1.01763	-0.580114		-0.378403	74	1	male	Liver	Intrahepatic cholangiocarcinoma	T3N1M0	G1	4
377	-0.916613	-0.537698		-0.397415	74	1	male	Liver	Intrahepatic cholangiocarcinoma	T3N1M0	G1	4
378	-0.509013	-0.226812		-0.224695	74	1	male	Liver	Intrahepatic cholangiocarcinoma	T3N1M0	G1	4
379	-0.356373	0.146036		-0.220162	74	1	male	Liver	Intrahepatic cholangiocarcinoma	T3N1M0	G1	4
380	-0.291237	0.173524		0.216861	32	0	Female	Liver	Intrahepatic cholangiocarcinoma	T2N1M0	G1	4
381	0.0984004	0.418695		0.246791	32	0	Female	Liver	Intrahepatic cholangiocarcinoma	T2N1M0	G1	4
382	-0.122734	0.256212		0.359427	32	0	Female	Liver	Intrahepatic cholangiocarcinoma	T2N1M0	G1	4
383	-0.125635	0.347441		0.383398	32	0	Female	Liver	Intrahepatic cholangiocarcinoma	T2N1M0	G1	4
384	-0.494849	-0.111008		-0.13475	49	1	male	Liver	Intrahepatic cholangiocarcinoma	T2N1M0	G2	4
385	-0.672071	-0.341798		-0.163505	49	1	male	Liver	Intrahepatic cholangiocarcinoma	T2N1M0	G2	4
386	-0.368275	-0.158754		-0.467891	49	1	male	Liver	Intrahepatic cholangiocarcinoma	T2N1M0	G2	4
387	-0.441744	-0.0397916		0.062832	49	1	male	Liver	Intrahepatic cholangiocarcinoma	T2N1M0	G2	4
388	-0.665644	-0.506217		-1.26073	40	1	male	Liver	Intrahepatic cholangiocarcinoma	T2N1M0	G1	4
389	-0.300223	-0.274174		-0.940389	40	1	male	Liver	Intrahepatic cholangiocarcinoma	T2N1M0	G1	4
390	-0.304747	-0.18932		-0.965417	40	1	male	Liver	Intrahepatic cholangiocarcinoma	T2N1M0	G1	4
391	-0.623934	-0.38789		-1.17105	40	1	male	Liver	Intrahepatic cholangiocarcinoma	T2N1M0	G1	4
392	0.0216643	-0.302503		0.22174	60	1	male	Liver	Intrahepatic cholangiocarcinoma	T3N1M0	G1	4
393	-0.328078	-0.349347		-0.443092	60	1	male	Liver	Intrahepatic cholangiocarcinoma	T3N1M0	G1	4
394	-0.14613	-0.101789		-0.298932	60	1	male	Liver	Intrahepatic cholangiocarcinoma	T3N1M0	G1	4
395	-0.123315	-0.227877		-0.622053	60	1	male	Liver	Intrahepatic cholangiocarcinoma	T3N1M0	G1	4
396	-0.762904	-0.874306		-1.96234	65	0	Female	Liver	Intrahepatic cholangiocarcinoma	T2N1M0	G1	4
397	-0.761344	-0.836723		-1.4066	65	0	Female	Liver	Intrahepatic cholangiocarcinoma	T2N1M0	G1	4
398	-0.736023	-1.04179		-0.832135	65	0	Female	Liver	Intrahepatic cholangiocarcinoma	T2N1M0	G1	4
399	-1.00293	-1.0668		-0.789799	65	0	Female	Liver	Intrahepatic cholangiocarcinoma	T2N1M0	G1	4
400	0.071548	-0.104692		0.106474	69	1	male	Liver	Intrahepatic cholangiocarcinoma	T3N1M0	G1	4
401	-0.526794	-0.598563		0.29296	69	1	male	Liver	Intrahepatic cholangiocarcinoma	T3N1M0	G1	4
402	0.204084	0.0472434		0.345064	69	1	male	Liver	Intrahepatic cholangiocarcinoma	T3N1M0	G1	4
403	0.112247	-0.000482143		0.252737	69	1	male	Liver	Intrahepatic cholangiocarcinoma	T3N1M0	G1	4
404	-0.774397	-0.63298		0.239395	71	1	male	Liver	Intrahepatic cholangiocarcinoma	T2N1M0	G1	4
405	-0.506229	-0.492781		0.338831	71	1	male	Liver	Intrahepatic cholangiocarcinoma	T2N1M0	G1	4
406	-1.09851	-0.796025		0.170519	39	0	Female	Liver	Intrahepatic cholangiocarcinoma	T3N1M0	G1	4
407	-0.970697	-0.754656		-0.109124	39	0	Female	Liver	Intrahepatic cholangiocarcinoma	T3N1M0	G1	4
408	-1.08918	-0.826752		-0.0694764	39	0	Female	Liver	Intrahepatic cholangiocarcinoma	T3N1M0	G1	4
409	-1.08235	-0.7587		0.159064	39	0	Female	Liver	Intrahepatic cholangiocarcinoma	T3N1M0	G1	4
410	-1.07041	-0.57904		0.526603	70	0	Female	Liver	Intrahepatic cholangiocarcinoma	T3N1M0	G2	4
411	-0.512811	-0.0943311		0.72105	70	0	Female	Liver	Intrahepatic cholangiocarcinoma	T3N1M0	G2	4
412	-0.55895	-0.231747		0.564467	70	0	Female	Liver	Intrahepatic cholangiocarcinoma	T3N1M0	G2	4
413	-0.852943	-0.418161		0.576788	70	0	Female	Liver	Intrahepatic cholangiocarcinoma	T3N1M0	G2	4
414	-0.342243	-0.392776		0.0833292	55	0	Female	Liver	Intrahepatic cholangiocarcinoma	T2N1M0	G1	4
415	0.0564395	0.0857717		-0.0103739	55	0	Female	Liver	Intrahepatic cholangiocarcinoma	T2N1M0	G1	4
416	-0.107791	-0.0761656		-0.0447804	55	0	Female	Liver	Intrahepatic cholangiocarcinoma	T2N1M0	G1	4
417	-0.197592	-0.181032		0.102443	55	0	Female	Liver	Intrahepatic cholangiocarcinoma	T2N1M0	G1	4
418	0.459644	0.547979		-0.048483	73	1	male	Liver	Intrahepatic cholangiocarcinoma	T2N1M0	G2	4
419	0.357601	0.464339		-0.0364181	73	1	male	Liver	Intrahepatic cholangiocarcinoma	T2N1M0	G2	4
420	-0.0708185	0.0179272		-0.452096	73	1	male	Liver	Intrahepatic cholangiocarcinoma	T2N1M0	G2	4
421	0.282003	0.398316		-0.169657	73	1	male	Liver	Intrahepatic cholangiocarcinoma	T2N1M0	G2	4
422	-1.49915	-0.955643		-0.156929	51	1	male	Liver	Intrahepatic cholangiocarcinoma	T3N1M0	G0	4
423	-1.11063	-0.653939		0.173628	51	1	male	Liver	Intrahepatic cholangiocarcinoma	T3N1M0	G0	4
424	-1.40696	-0.841427		0.214876	51	1	male	Liver	Intrahepatic cholangiocarcinoma	T3N1M0	G0	4
425	-0.804103	-0.425887		0.7087	51	1	male	Liver	Intrahepatic cholangiocarcinoma	T3N1M0	G0	4
426	0.758981	0.620972		-0.412453	69	0	Female	Liver	Intrahepatic cholangiocarcinoma	T2N1M0	G2	4
427	0.698829	0.562477		-0.461649	69	0	Female	Liver	Intrahepatic cholangiocarcinoma	T2N1M0	G2	4
428	0.596897	0.521847		-0.485231	69	0	Female	Liver	Intrahepatic cholangiocarcinoma	T2N1M0	G2	4
429	0.694474	0.598565		-0.333489	69	0	Female	Liver	Intrahepatic cholangiocarcinoma	T2N1M0	G2	4
430	0.178409	0.33528		0.429177	63	1	male	Liver	Intrahepatic cholangiocarcinoma	T2N1M0	G2	4
431	-0.120062	-0.00156269		-0.00735212	63	1	male	Liver	Intrahepatic cholangiocarcinoma	T2N1M0	G2	4
432	-0.303401	-0.126127		0.209392	63	1	male	Liver	Intrahepatic cholangiocarcinoma	T2N1M0	G2	4
433	-0.308423	-0.0855011		0.0997494	63	1	male	Liver	Intrahepatic cholangiocarcinoma	T2N1M0	G2	4
434	0.0345194	-0.135156		-0.691447	67	0	Female	Liver	Intrahepatic cholangiocarcinoma	T3N1M0	G2	4
435	-0.77507	-0.808443		-0.737474	67	0	Female	Liver	Intrahepatic cholangiocarcinoma	T3N1M0	G2	4
436	-0.809119	-0.846853		-0.732176	67	0	Female	Liver	Intrahepatic cholangiocarcinoma	T3N1M0	G2	4
437	-0.227841	-0.372726		-0.634805	67	0	Female	Liver	Intrahepatic cholangiocarcinoma	T3N1M0	G2	4
438	-0.845027	-0.992957		-1.14355	46	0	Female	Liver	Intrahepatic cholangiocarcinoma	T2N1M0	G2	4
439	-0.899434	-0.954074		-0.821123	46	0	Female	Liver	Intrahepatic cholangiocarcinoma	T2N1M0	G2	4
440	-0.896357	-0.840944		-0.731293	46	0	Female	Liver	Intrahepatic cholangiocarcinoma	T2N1M0	G2	4
441	-0.652967	-0.651929		-0.771582	46	0	Female	Liver	Intrahepatic cholangiocarcinoma	T2N1M0	G2	4
442	0.363866	-0.0212643		-0.431274	54	1	male	Liver	Intrahepatic cholangiocarcinoma	T3N1M0	G2	4
443	0.516156	0.0681056		-0.235708	54	1	male	Liver	Intrahepatic cholangiocarcinoma	T3N1M0	G2	4
444	0.550521	0.216372		-0.181477	54	1	male	Liver	Intrahepatic cholangiocarcinoma	T3N1M0	G2	4
445	0.169052	-0.148638		-0.389997	54	1	male	Liver	Intrahepatic cholangiocarcinoma	T3N1M0	G2	4
446	-0.147696	-0.0574877		0.677269	68	1	male	Liver	Intrahepatic cholangiocarcinoma	T3N1M0	G0	4
447	-0.284598	-0.175863		0.778604	68	1	male	Liver	Intrahepatic cholangiocarcinoma	T3N1M0	G0	4
448	-0.436624	-0.192422		0.868547	68	1	male	Liver	Intrahepatic cholangiocarcinoma	T3N1M0	G0	4
449	-0.441091	-0.20044		0.747254	68	1	male	Liver	Intrahepatic cholangiocarcinoma	T3N1M0	G0	4
450	-0.759079	-0.738063		-0.756609	54	0	Female	Liver	Intrahepatic cholangiocarcinoma	T3N1M0	G2	4
451	-0.656343	-0.622407		-0.749558	54	0	Female	Liver	Intrahepatic cholangiocarcinoma	T3N1M0	G2	4
452	-0.744856	-0.726333		-0.754364	54	0	Female	Liver	Intrahepatic cholangiocarcinoma	T3N1M0	G2	4
453	-0.761192	-0.845758		-0.656144	54	0	Female	Liver	Intrahepatic cholangiocarcinoma	T3N1M0	G2	4
454	-0.620367	-0.756175		-0.628794	51	0	Female	Liver	Intrahepatic cholangiocarcinoma	T3N1M0	G0	4
455	-0.727182	-0.822134		-0.80502	51	0	Female	Liver	Intrahepatic cholangiocarcinoma	T3N1M0	G0	4
456	-0.707027	-0.757898		-0.747307	51	0	Female	Liver	Intrahepatic cholangiocarcinoma	T3N1M0	G0	4
457	-1.73985	-1.56382		-1.11908	51	0	Female	Liver	Intrahepatic cholangiocarcinoma	T3N1M0	G0	4
458	-0.3354	-0.0042108		0.801725	52	1	male	Liver	Intrahepatic cholangiocarcinoma	T2N1M0	G2	4
459	-0.577464	-0.239385		0.695281	52	1	male	Liver	Intrahepatic cholangiocarcinoma	T2N1M0	G2	4
460	-0.0345284	0.13708		0.22907	52	1	male	Liver	Intrahepatic cholangiocarcinoma	T2N1M0	G2	4
461	0.117793	0.427128		0.886761	52	1	male	Liver	Intrahepatic cholangiocarcinoma	T2N1M0	G2	4
462	0.0224778	0.270405		0.488369	52	1	male	Liver	Intrahepatic cholangiocarcinoma	T3N1M0	G3	4
463	0.0355286	0.283906		0.632469	52	1	male	Liver	Intrahepatic cholangiocarcinoma	T3N1M0	G3	4
464	-0.240014	-0.042752		0.107999	52	1	male	Liver	Intrahepatic cholangiocarcinoma	T3N1M0	G3	4
465	0.324508	0.551896		0.610753	52	1	male	Liver	Intrahepatic cholangiocarcinoma	T3N1M0	G3	4
466	-0.656237	-0.47268		-0.85053	67	1	male	Liver	Intrahepatic cholangiocarcinoma	T3N1M0	G2	4
467	-0.67888	-0.46854		-0.769018	67	1	male	Liver	Intrahepatic cholangiocarcinoma	T3N1M0	G2	4
468	-0.809287	-0.628039		-0.855178	67	1	male	Liver	Intrahepatic cholangiocarcinoma	T3N1M0	G2	4
469	-0.488459	-0.368529		-0.732025	67	1	male	Liver	Intrahepatic cholangiocarcinoma	T3N1M0	G2	4
470	0.197381	-0.018959		0.410258	65	1	male	Liver	Intrahepatic cholangiocarcinoma	T3N1M0	G2	4
471	-0.298868	-0.329633		0.0708505	65	1	male	Liver	Intrahepatic cholangiocarcinoma	T3N1M0	G2	4
472	-1.45764	-1.21841		-0.75781	60	1	male	Liver	Intrahepatic cholangiocarcinoma	T2N1M0	G3	4
473	-0.789714	-0.758683		-0.376265	60	1	male	Liver	Intrahepatic cholangiocarcinoma	T2N1M0	G3	4
474	-0.706486	-0.725871		-0.301229	60	1	male	Liver	Intrahepatic cholangiocarcinoma	T2N1M0	G3	4
475	-0.963649	-0.961572		-0.546927	60	1	male	Liver	Intrahepatic cholangiocarcinoma	T2N1M0	G3	4
476	0.498697	0.303935		-0.0593529	50	0	Female	Liver	Intrahepatic cholangiocarcinoma	T3N1M0	G2	4
477	0.509142	0.28257		-0.254871	50	0	Female	Liver	Intrahepatic cholangiocarcinoma	T3N1M0	G2	4
478	0.581028	0.337323		-0.184608	50	0	Female	Liver	Intrahepatic cholangiocarcinoma	T3N1M0	G2	4
479	0.405563	0.169042		-0.0532241	50	0	Female	Liver	Intrahepatic cholangiocarcinoma	T3N1M0	G2	4
480	-0.351878	-0.342484		-0.00163578	49	1	male	Liver	Intrahepatic cholangiocarcinoma	T2N1M0	G3	4
481	-0.209096	-0.136872		0.387919	49	1	male	Liver	Intrahepatic cholangiocarcinoma	T2N1M0	G3	4
482	-0.121913	-0.0856814		0.473045	49	1	male	Liver	Intrahepatic cholangiocarcinoma	T2N1M0	G3	4
483	-0.322968	-0.153175		0.618395	49	1	male	Liver	Intrahepatic cholangiocarcinoma	T2N1M0	G3	4
484	-0.811315	-0.84492		-0.70114	64	1	male	Liver	Intrahepatic cholangiocarcinoma	T3N1M0	G2	4
485	-0.918515	-0.960957		-0.913441	64	1	male	Liver	Intrahepatic cholangiocarcinoma	T3N1M0	G2	4
486	-0.590213	-0.706957		-0.979928	64	1	male	Liver	Intrahepatic cholangiocarcinoma	T3N1M0	G2	4
487	-0.860962	-0.925818		-0.792733	64	1	male	Liver	Intrahepatic cholangiocarcinoma	T3N1M0	G2	4
488	-0.420234	-0.525907		-0.203401	63	1	male	Liver	Intrahepatic cholangiocarcinoma	T3N1M0	G3	4
489	-0.359917	-0.442782		-0.160238	63	1	male	Liver	Intrahepatic cholangiocarcinoma	T3N1M0	G3	4
490	-0.217852	-0.397232		-0.299704	63	1	male	Liver	Intrahepatic cholangiocarcinoma	T3N1M0	G3	4
491	-0.152371	-0.289301		-0.0507017	63	1	male	Liver	Intrahepatic cholangiocarcinoma	T3N1M0	G3	4
492	-1.01807	-0.766365		0.203249	45	1	male	Liver	Intrahepatic cholangiocarcinoma	T3N1M0	G3	4
493	-0.980538	-0.744295		0.333117	45	1	male	Liver	Intrahepatic cholangiocarcinoma	T3N1M0	G3	4
494	-1.05928	-0.769864		0.274854	45	1	male	Liver	Intrahepatic cholangiocarcinoma	T3N1M0	G3	4
495	-0.812942	-0.693167		0.278811	45	1	male	Liver	Intrahepatic cholangiocarcinoma	T3N1M0	G3	4
496	-1.14299	-0.832407		0.374453	51	1	male	Liver	Intrahepatic cholangiocarcinoma	T3N1M0	G3	4
497	-1.25929	-0.903214		0.341865	51	1	male	Liver	Intrahepatic cholangiocarcinoma	T3N1M0	G3	4
498	-1.2561	-0.892155		0.200898	51	1	male	Liver	Intrahepatic cholangiocarcinoma	T3N1M0	G3	4
499	-0.91669	-0.769696		0.469229	51	1	male	Liver	Intrahepatic cholangiocarcinoma	T3N1M0	G3	4
500	-0.337625	-0.431256		-0.0859475	68	1	male	Liver	Intrahepatic cholangiocarcinoma	T3N1M0	G3	4
501	-0.379947	-0.511622		-0.255505	68	1	male	Liver	Intrahepatic cholangiocarcinoma	T3N1M0	G3	4
502	0.131556	-0.113634		0.121676	68	1	male	Liver	Intrahepatic cholangiocarcinoma	T3N1M0	G3	4
503	-0.253858	-0.366672		-0.10163	68	1	male	Liver	Intrahepatic cholangiocarcinoma	T3N1M1	G3	4
504	0.334995	0.457222		0.668759	34	1	male	Liver	Intrahepatic cholangiocarcinoma	T2N1M0	G0	4
505	0.336297	0.358233		0.280957	34	1	male	Liver	Intrahepatic cholangiocarcinoma	T2N1M0	G0	4
506	0.296176	0.329202		0.445595	34	1	male	Liver	Intrahepatic cholangiocarcinoma	T2N1M0	G0	4
507	0.109832	0.260806		0.490261	34	1	male	Liver	Intrahepatic cholangiocarcinoma	T2N1M0	G0	4
508	0.127526	0.0340416		0.215296	65	1	male	Liver	Intrahepatic cholangiocarcinoma	T2N1M0	G0	4
509	0.267969	0.0609381		-0.114821	65	1	male	Liver	Intrahepatic cholangiocarcinoma	T2N1M0	G0	4
510	0.022545	-0.139008		-0.407059	65	1	male	Liver	Intrahepatic cholangiocarcinoma	T2N1M0	G0	4
511	0.179501	0.14579		0.295725	65	1	male	Liver	Intrahepatic cholangiocarcinoma	T2N1M0	G0	4
512	0.908379	0.485508		-0.261452	70	0	Female	Liver	Intrahepatic cholangiocarcinoma	T3N1M0	G3	4
513	0.766485	0.358551		-0.514738	70	0	Female	Liver	Intrahepatic cholangiocarcinoma	T3N1M0	G3	4
514	1.01104	0.618348		-0.44114	70	0	Female	Liver	Intrahepatic cholangiocarcinoma	T3N1M0	G3	4
515	0.738269	0.375193		-0.197098	70	0	Female	Liver	Intrahepatic cholangiocarcinoma	T3N1M0	G3	4
516	0.143861	0.00595973		0.330427	47	0	Female	Liver	Intrahepatic cholangiocarcinoma	T2N1M0	G3	4
517	-0.201232	-0.270926		0.0914513	47	0	Female	Liver	Intrahepatic cholangiocarcinoma	T2N1M0	G3	4
518	-0.195378	-0.295631		0.294001	47	0	Female	Liver	Intrahepatic cholangiocarcinoma	T2N1M0	G3	4
519	0.149993	-0.0855919		0.0501846	47	0	Female	Liver	Intrahepatic cholangiocarcinoma	T2N1M0	G3	4
520	-1.20347	-0.968892		0.360979	60	0	Female	Liver	Intrahepatic cholangiocarcinoma	T3N1M0	G0	4
521	-1.17592	-1.02298		0.350298	60	0	Female	Liver	Intrahepatic cholangiocarcinoma	T3N1M0	G0	4
522	-1.30017	-1.02696		0.305856	60	0	Female	Liver	Intrahepatic cholangiocarcinoma	T3N1M0	G0	4
523	-1.0181	-0.676103		0.599886	60	0	Female	Liver	Intrahepatic cholangiocarcinoma	T3N1M0	G0	4
524	0.271013	0.186726		0.448546	57	0	Female	Liver	Intrahepatic cholangiocarcinoma	T2N1M0	G2	4
525	0.236866	0.155246		0.427464	57	0	Female	Liver	Intrahepatic cholangiocarcinoma	T2N1M0	G2	4
526	0.397524	0.392392		0.609222	57	0	Female	Liver	Intrahepatic cholangiocarcinoma	T2N1M0	G2	4
527	-0.0451498	0.0398252		0.641795	57	0	Female	Liver	Intrahepatic cholangiocarcinoma	T2N1M0	G2	4
528	0.594659	0.598082		0.807281	52	0	Female	Liver	Intrahepatic cholangiocarcinoma	T3N1M0	G3	4
529	0.650253	0.632669		0.817388	52	0	Female	Liver	Intrahepatic cholangiocarcinoma	T3N1M0	G3	4
530	1.11468	0.876591		0.756079	69	1	male	Liver	Hepatocellular carcinoma	T3N1M0	G3	4
531	1.16975	0.83129		0.411833	69	1	male	Liver	Hepatocellular carcinoma	T3N1M0	G3	4
532	1.26499	1.03869		0.757141	69	1	male	Liver	Hepatocellular carcinoma	T3N1M0	G3	4
533	1.40687	1.17243		0.694072	69	1	male	Liver	Hepatocellular carcinoma	T3N1M0	G3	4
534	0.330789	0.356442		0.254778	52	1	male	Liver	Hepatocellular carcinoma	T3N1M0	G2	4
535	0.443288	0.427128		-0.102905	52	1	male	Liver	Hepatocellular carcinoma	T3N1M0	G2	4
536	0.127326	0.23189		0.309356	52	1	male	Liver	Hepatocellular carcinoma	T3N1M0	G2	4
537	0.388985	0.405025		0.129772	52	1	male	Liver	Hepatocellular carcinoma	T3N1M0	G2	4
538	0.902115	0.887538		-0.277654	61	1	male	Liver	Hepatocellular carcinoma	T3N1M0	G2	4
539	0.79059	0.836628		-0.0390239	61	1	male	Liver	Hepatocellular carcinoma	T3N1M0	G2	4
540	0.526353	0.531469		-0.251609	61	1	male	Liver	Hepatocellular carcinoma	T3N1M0	G2	4
541	0.920708	0.856799		-0.0139223	61	1	male	Liver	Hepatocellular carcinoma	T3N1M0	G2	4
542	1.26271	1.16354		0.0728657	76	1	male	Liver	Hepatocellular carcinoma	T3N1M0	G2	4
543	1.38442	1.26939		-0.17163	76	1	male	Liver	Hepatocellular carcinoma	T3N1M0	G2	4
544	1.36209	1.18951		-0.296486	76	1	male	Liver	Hepatocellular carcinoma	T3N1M0	G2	4
545	1.30278	1.21345		-0.0425784	76	1	male	Liver	Hepatocellular carcinoma	T3N1M0	G2	4
546	1.33395	1.16284		0.264192	57	1	male	Liver	Hepatocellular carcinoma	T3N1M0	G3	4
547	1.4355	1.17226		0.507209	57	1	male	Liver	Hepatocellular carcinoma	T3N1M0	G3	4
548	1.3211	1.11573		0.253329	57	1	male	Liver	Hepatocellular carcinoma	T3N1M0	G3	4
549	1.36558	1.15302		0.349017	57	1	male	Liver	Hepatocellular carcinoma	T3N1M0	G3	4
550	1.05078	0.82317		-0.0730851	40	1	male	Liver	Hepatocellular carcinoma	T3N1M0	G2	4
551	1.13483	0.878097		-0.232561	40	1	male	Liver	Hepatocellular carcinoma	T3N1M0	G2	4
552	1.22772	0.933815		-0.168909	40	1	male	Liver	Hepatocellular carcinoma	T3N1M0	G2	4
553	1.04556	0.771112		-0.0457283	40	1	male	Liver	Hepatocellular carcinoma	T3N1M0	G2	4
554	-0.737752	-0.5337		0.16751	64	1	male	Liver	Hepatocellular carcinoma	T3N1M0	G2	4
555	-0.168084	-0.141807		-0.100481	64	1	male	Liver	Hepatocellular carcinoma	T3N1M0	G2	4
556	0.0627584	0.058539		0.106495	64	1	male	Liver	Hepatocellular carcinoma	T3N1M0	G2	4
557	-0.135435	-0.0805712		0.539773	64	1	male	Liver	Hepatocellular carcinoma	T3N1M0	G2	4
558	0.483284	0.202128		-0.411243	52	1	male	Liver	Hepatocellular carcinoma	T3N1M0	G3	4
559	0.181939	-0.0100442		-0.497392	52	1	male	Liver	Hepatocellular carcinoma	T3N1M0	G3	4
560	0.0951211	-0.0467372		-0.527051	52	1	male	Liver	Hepatocellular carcinoma	T3N1M0	G3	4
561	0.479031	0.172516		-0.608662	52	1	male	Liver	Hepatocellular carcinoma	T3N1M0	G3	4
562	-0.402336	-0.417732		-0.136968	52	1	male	Liver	Hepatocellular carcinoma	T3N1M0	G3	4
563	-0.783552	-0.774777		-0.424656	52	1	male	Liver	Hepatocellular carcinoma	T3N1M0	G3	4
564	-0.902948	-0.895422		-0.638339	52	1	male	Liver	Hepatocellular carcinoma	T3N1M0	G3	4
565	-0.536045	-0.527497		0.0324336	52	1	male	Liver	Hepatocellular carcinoma	T3N1M0	G3	4
566	0.419812	0.300415		0.155835	69	0	Female	Liver	Hepatocellular carcinoma	T4N1M0	G2	4
567	0.347217	0.257551		-0.153863	69	0	Female	Liver	Hepatocellular carcinoma	T4N1M0	G2	4
568	0.0311625	-0.0833456		-0.115475	69	0	Female	Liver	Hepatocellular carcinoma	T4N1M0	G2	4
569	0.760263	0.554123		0.0136661	69	0	Female	Liver	Hepatocellular carcinoma	T4N1M0	G2	4
570	-0.075426	-0.403696		-0.517287	36	1	male	Liver	Hepatocellular carcinoma	T3N1M0	G2	4
571	-0.261564	-0.509477		-0.797507	36	1	male	Liver	Hepatocellular carcinoma	T3N1M0	G2	4
572	-0.570962	-0.754245		-0.956758	36	1	male	Liver	Hepatocellular carcinoma	T3N1M0	G2	4
573	-0.26983	-0.539043		-0.950374	36	1	male	Liver	Hepatocellular carcinoma	T3N1M0	G2	4
574	0.276865	-0.171966		-0.881171	56	1	male	Liver	Hepatocellular carcinoma	T2N1M0	G2	4
575	-0.0664112	-0.46329		-1.08694	56	1	male	Liver	Hepatocellular carcinoma	T2N1M0	G2	4
576	-0.0821803	-0.489896		-0.891088	56	1	male	Liver	Hepatocellular carcinoma	T2N1M0	G2	4
577	-0.0915871	-0.470146		-1.09681	56	1	male	Liver	Hepatocellular carcinoma	T2N1M0	G2	4
578	-0.922739	-0.402414		0.717338	27	1	male	Liver	Hepatocellular carcinoma	T3N1M0	G2	4
579	-1.04191	-0.595219		0.474799	27	1	male	Liver	Hepatocellular carcinoma	T3N1M0	G2	4
580	-0.404408	-0.179464		-0.648332	37	1	male	Liver	Hepatocellular carcinoma	T4N1M0	G3	4
581	-0.15965	0.117562		-0.184521	37	1	male	Liver	Hepatocellular carcinoma	T4N1M0	G3	4
582	-0.337835	0.057622		-0.15472	37	1	male	Liver	Hepatocellular carcinoma	T4N1M0	G3	4
583	-0.557238	-0.174736		-0.369516	37	1	male	Liver	Hepatocellular carcinoma	T4N1M0	G3	4
584	-0.738584	-0.565158		0.02262	64	1	male	Liver	Hepatocellular carcinoma	T2N1M0	G2	4
585	-0.3992	-0.221308		0.21056	64	1	male	Liver	Hepatocellular carcinoma	T2N1M0	G2	4
586	-0.218577	-0.0593922		0.203538	64	1	male	Liver	Hepatocellular carcinoma	T2N1M0	G2	4
587	-0.252679	-0.122875		-0.0083626	64	1	male	Liver	Hepatocellular carcinoma	T2N1M0	G2	4
588	0.528998	0.0427661		-0.520448	34	1	male	Liver	Cirrhosis	T3N1M0	G0	4
589	0.499219	-0.0855271		-0.5761	34	1	male	Liver	Cirrhosis	T3N1M0	G0	4
590	0.558066	0.26106		-0.19033	34	1	male	Liver	Cirrhosis	T3N1M0	G0	4
591	0.532793	0.344143		-0.229941	34	1	male	Liver	Cirrhosis	T3N1M0	G0	4
592	0.0139528	-0.240146		-0.203403	61	0	Female	Liver	Cirrhosis	T2N1M0	G0	4
593	-0.785001	-0.820046		-0.169325	61	0	Female	Liver	Cirrhosis	T2N1M0	G0	4
594	0.113137	-0.0543314		-0.210881	61	0	Female	Liver	Cirrhosis	T2N1M0	G0	4
595	0.199999	-0.0288557		-0.130529	61	0	Female	Liver	Cirrhosis	T2N1M0	G0	4
596	-0.316404	-0.289855		0.28017	63	1	male	Liver	Cirrhosis	T2N1M0	G0	4
597	0.0152285	0.0269814		0.349661	63	1	male	Liver	Cirrhosis	T2N1M0	G0	4
598	-0.0430678	-0.157164		0.567745	63	1	male	Liver	Cirrhosis	T2N1M0	G0	4
599	0.265161	0.155554		0.632762	63	1	male	Liver	Cirrhosis	T2N1M0	G0	4
600	-0.291512	-0.19861		0.324967	52	0	Female	Liver	Cirrhosis	T3N1M0	G0	4
601	-0.742758	-0.612733		-0.190284	52	0	Female	Liver	Cirrhosis	T3N1M0	G0	4
602	-0.187751	-0.122336		0.372834	52	0	Female	Liver	Cirrhosis	T3N1M0	G0	4
603	-0.617419	-0.441914		0.67031	52	0	Female	Liver	Cirrhosis	T3N1M0	G0	4
604	0.942505	0.535674		-0.600062	30	1	male	Liver	Carcinoid
605	0.853189	0.470478		-0.423151	30	1	male	Liver	Carcinoid
606	0.909953	0.539998		-0.447281	30	1	male	Liver	Carcinoid
607	0.833671	0.408882		-0.43475	30	1	male	Liver	Carcinoid
608	0.535918	0.517609		1.01673	37	0	Female	Liver	Carcinoid
609	0.433189	0.52641		1.2626	37	0	Female	Liver	Carcinoid
610	0.284734	0.40775		1.26605	37	0	Female	Liver	Carcinoid
611	0.908837	0.918784		1.42526	37	0	Female	Liver	Carcinoid
612	0.210914	0.128486		0.542857	56	1	male	Liver	Adenosquamous carcinoma	T3N1M0	G0	4
613	0.198174	0.0831395		0.429714	56	1	male	Liver	Adenosquamous carcinoma	T3N1M0	G0	4
614	0.085247	0.0624272		0.479301	56	1	male	Liver	Adenosquamous carcinoma	T3N1M0	G0	4
615	0.250965	0.161534		0.564861	56	1	male	Liver	Adenosquamous carcinoma	T3N1M0	G0	4
616	-0.187159	-0.394612		-0.270336	58	0	Female	Liver	Adenosquamous carcinoma	T3N1M0	G0	4
617	-0.184326	-0.414308		-0.405185	58	0	Female	Liver	Adenosquamous carcinoma	T3N1M0	G0	4
618	0.572087	0.0263006		-1.03429	58	0	Female	Liver	Adenosquamous carcinoma	T3N1M0	G0	4
619	0.31376	0.0524251		-0.289484	58	0	Female	Liver	Adenosquamous carcinoma	T3N1M0	G0	4
620	0.424505	0.129429		-0.651494	75	0	Female	Liver	Hepatocellular carcinoma	T3N1M0	G2	4
621	0.674055	0.42165		-0.68072	75	0	Female	Liver	Hepatocellular carcinoma	T3N1M0	G2	4
622	0.579262	0.448117		-0.48796	75	0	Female	Liver	Hepatocellular carcinoma	T3N1M0	G2	4
623	0.686449	0.378857		-0.833624	75	0	Female	Liver	Hepatocellular carcinoma	T3N1M0	G2	4
624	0.449229	0.476833		0.374416	52	0	Female	Liver	Hepatocellular carcinoma	T3N1M0	G2	4
625	0.120407	0.232331		0.364825	52	0	Female	Liver	Hepatocellular carcinoma	T3N1M0	G2	4
626	0.0402688	0.311236		0.750986	52	0	Female	Liver	Hepatocellular carcinoma	T3N1M0	G2	4
627	0.432692	0.589137		0.813973	52	0	Female	Liver	Hepatocellular carcinoma	T3N1M0	G2	4
628	0.414228	0.428512		0.414127	56	1	male	Liver	Intrahepatic cholangiocarcinoma	T3N0M1	G2	4
629	0.359239	0.154112		-0.405979	56	1	male	Liver	Intrahepatic cholangiocarcinoma	T3N0M1	G2	4
630	0.357483	0.17411		-0.355016	56	1	male	Liver	Intrahepatic cholangiocarcinoma	T3N0M1	G2	4
631	0.454552	0.452003		0.404891	56	1	male	Liver	Intrahepatic cholangiocarcinoma	T3N0M1	G2	4
632	-0.639909	-0.819816		-0.815582	56	1	male	Liver	Intrahepatic cholangiocarcinoma	T3N0M1	G2	4
633	-0.399942	-0.405017		-0.742078	56	1	male	Liver	Intrahepatic cholangiocarcinoma	T3N0M1	G2	4
634	-0.441695	-0.449573		-0.71315	56	1	male	Liver	Intrahepatic cholangiocarcinoma	T3N0M1	G2	4
635	-0.299977	-0.388774		-0.610061	56	1	male	Liver	Intrahepatic cholangiocarcinoma	T3N0M1	G2	4
636	-0.483074	-0.54809		-0.806299	54	0	Female	Liver	Intrahepatic cholangiocarcinoma	T3N1M0	G2	4
637	-0.191981	-0.195296		-0.498815	54	0	Female	Liver	Intrahepatic cholangiocarcinoma	T3N1M0	G2	4
638	-0.159712	-0.235657		-0.754325	54	0	Female	Liver	Intrahepatic cholangiocarcinoma	T3N1M0	G2	4
639	-0.315766	-0.464964		-0.513902	54	0	Female	Liver	Intrahepatic cholangiocarcinoma	T3N1M0	G2	4
640	0.75104	0.489376		-0.0233847	54	0	Female	Liver	Intrahepatic cholangiocarcinoma	T3N1M0	G2	4
641	0.521416	0.288218		0.0845739	54	0	Female	Liver	Intrahepatic cholangiocarcinoma	T3N1M0	G2	4
642	1.03634	0.762022		0.139969	54	0	Female	Liver	Intrahepatic cholangiocarcinoma	T3N1M0	G2	4
643	0.740566	0.532975		0.105748	54	0	Female	Liver	Intrahepatic cholangiocarcinoma	T3N1M0	G2	4
644	0.944254	0.534616		-0.0636098	57	1	male	Liver	Hepatocellular carcinoma	T4N1M1	G2	4
645	0.144322	-0.133524		-0.454469	57	1	male	Liver	Hepatocellular carcinoma	T4N1M1	G2	4
646	0.71706	0.375926		-0.0890279	57	1	male	Liver	Hepatocellular carcinoma	T4N1M1	G2	4
647	0.92732	0.472319		-0.195527	57	1	male	Liver	Hepatocellular carcinoma	T4N1M1	G2	4
648	0.142257	-0.222072		-1.54311	57	1	male	Liver	Hepatocellular carcinoma	T4N1M1	G2	4
649	0.0887905	-0.347797		-1.33128	57	1	male	Liver	Hepatocellular carcinoma	T4N1M1	G2	4
