# Supplementary material for: The Human TOR Signaling Regulator Is the Key Indicator of Liver Cancer Patients’ Overall Survival: TIPRL/LC3/CD133/CD44 as Potential Biomarkers for Early Liver Cancers
Source: Cancers (Basel). 2021 Jun 11;13(12):2925. doi: 10.3390/cancers13122925 (PMC8230774; doi:10.3390/cancers13122925)
Supplement: Supplementary file 1 [file cancers-13-02925-s001.zip › Table S4.xlsx]

## Sheet: Sheet1
Table S4. The independence of the variables, TIPRL, LC3, CD133 and CD44, without CD46, as the biomarker on the OS of liver disease patients.
A. Training				B. Validation
Variables	chi-square	df	p value	Variables	chi-square	df	p value
TIPRL	27.57	1	1.5E-07	TIPRL	0.58	1	0.45
LC3	1.26	1	0.26	LC3	3.31	1	0.07
CD133	0.51	1	0.48	CD133	0.15	1	0.70
CD44	0.21	1	0.65	CD46	0.49	1	0.48
Diagnosis	144.04	5	<2E-16	Diagnosis	27.09	5	5.5E-05
TNM	4.71	6	0.58	TNM	37.66	7	3.5E-06
Global	181.80	15	<2E-16	Grade	4.72	3	0.19
				Stage	12.33	3	0.006
				Global	99.60	19	6.3E-13
