# Supplementary material for: The Human TOR Signaling Regulator Is the Key Indicator of Liver Cancer Patients’ Overall Survival: TIPRL/LC3/CD133/CD44 as Potential Biomarkers for Early Liver Cancers
Source: Cancers (Basel). 2021 Jun 11;13(12):2925. doi: 10.3390/cancers13122925 (PMC8230774; doi:10.3390/cancers13122925)
Supplement: Supplementary file 1 [file cancers-13-02925-s001.zip › Table S5.xlsx]

## Sheet: Sheet1
					Table 5. The significant association between TIPRL and the overall survival of liver disease/cancer patients set.
A. Training (n=790)					B. Training (HCC) (n=385)					C. Validation (n=649)					D. Validation (HCC) (n=155)					E. Validation (iCCA) (472)
Variables	Overall survival				Variables	Overall survival				Variables	Overall survival				Variables	Overall survival				Variables	Overall survival
	Univariate					Univariate					Univariate					Univariate					Univariate
		HR (95%CI)		P*			HR (95%CI)		P*		HR (95%CI)			P*		HR (95%CI)			P*			HR (95%CI)		P*
Age	median±SE				Age	median±SE				Age	median±SE				Age	median±SE				Age	median±SE
£50	47±0.2	ref			£50	47±0.3	ref			£50	39±0.6	ref			£50	37±0.8	ref			£50	46±0.7	ref
>50	56±0.2	0.57 (0.40-0.80)		0.001	>50	56±0.4	1.15 (0.83-1.60)		0.40	>50	60±0.3	0.88 (0.64-1.22)		0.44	>50	57±0.7	0.46 (0.25-0.84)		0.01	>50	60±0.4	1.27 (0.81-1.99)		0.31
Sex	n(%)				Sex	n(%)				Sex	n(%)				Sex	n(%)				Sex	n(%)
Female	88 (11.1)	ref			Female	40 (10.4)	ref			Female	261 (40.2)	ref			Female	24 (15.5)	ref			Female	214 (45.3)	ref
Male	702 (88.9)	0.58 (0.40-0.83)		0.003	Male	345 (89.6)	1.39 (0.83-2.32)		0.22	Male	388 (59.8)	3.0E-07 (5.47E-14-1.65)		0.96	Male	131 (84.5)	3.16e+08 (0.00-inf)		1.00	Male	258 (54.7)	4.23e+08 (0.00-inf)		0.99
Subtypes	n(%)				Subtypes	n(%)				Subtypes	n(%)				Subtypes	n(%)				Subtypes	n (%)
Hepatocellular carcinoma	385 (48.7)	0.79 (0.47-1.33)		0.37	Hepatocellular carcinoma	385 (100)				Hepatocellular carcinoma	155 (23.9)	4.72 (1.72-13.01)		0.003	Hepatocellular carcinoma	155 (100)				Intrahepatic cholangiocarcinoma	390 (100)
Chronic hepatitis	281 (35.6)	0.57 (0.33-0.97)		0.04						Intrahepatic cholangiocarcinoma	390 (60.1)	3.91 (1.44-10.63)		0.008
Cirrhosis	56 (7.1)	1.72 (0.96-3.08)		0.07						Cirrhosis	32 (4.9)	1.93 (1.47-16.53)		0.01
Hepatic steatosis	28 (3.5)	2.38 (1.18-4.79)		0.02						Carcinoid	16 (2.5)	55.72 (12.89-240.92)		7.36e-08
Liver cell/tissue degeneration, Inflammation of portal area	24 (3.0)	NA								Adenosquamous carcinoma	16 (2.5)	4.30 (1.07-17.39)		0.04
Normal liver tissue	16 (2.0)	ref								Cancer adjacent liver tissue	40 (6.2)	ref
TNM	n(%)				TNM	n(%)				TNM	n(%)				TNM	n(%)				TNM	n(%)
T1N0M0	46 (5.8)	2.13 (1.49-3.05)		3.83e-05	T1N0M0	46 (11.9)	ref.			T2N0M0	24 (3.7)	2.84 (1.06-7.65)		0.04	T2N1M0	16 (10.3)	ref.			T2N0M0	24 (5.1)	ref.
T2N0M0	243 (30.8)	1.24 (0.97-1.58)		0.08	T2N0M0	243 (63.1)	0.7 (0.50-1.12)		0.16	T2N1M0	149 (23.0)	2.32 (1.09-4.92)		0.03	T3N0M0	8 (5.2)	1.76 (0.52-5.97)		0.37	T2N1M0	133 (28.2)	0.7 (0.33-1.55)		0.40
T2N1M0	8 (1.0)	NA			T2N1M0	8 (2.1)	0.000000009 (0.00-Inf)		1	T3N0M0	16 (2.5)	2.28 (0.68-7.67)		0.18	T3N1M0	102 (65.8)	0.89 (0.41-1.91)		0.76	T3N0M0	8 (1.7)	0.0000006 (0.00-inf)		1.0
T2N0M1	8 (1.0)	8.5e-07 (0.0-Inf)		0.99	T2N0M1	8 (2.1)	0.000000009 (0.00-Inf)		1	T3N1M0	310 (47.8)	1.95 (0.95-4.02)		0.07	T4N1M0	17 (11.0)	0.50 (0.15-1.69)		0.26	T3N1M0	208 (44.1)	0.5 (0.23-1.04)		0.06
T3N0M0	40 (5.1)	0.38 (0.24-0.61)		5.43e-05	T3N0M0	40 (10.4)	1.0 (0.55-1.73)		0.93	T3N0M1	16 (2.5)	5.12 (1.89-13.88)		0.001	T4N1M1	14 (9.0)	1.00 (0.34-2.91)		0.99	T3N0M1	16 (3.4)	1.66 (0.62-4.51)		0.31
T4N0M0	40 (5.1)	NA			T4N0M0	40 (10.4)	0.00000001 (0.00-Inf)		0.99	T3N1M1	1 (0.2)	3.52 (0.44-28.29)		0.24						T3N1M1	1 (0.2)	1.06 (0.13-8.58)		0.95
										T4N1M0	17 (2.6)	1.36 (0.41-4.56)		0.62
										T4N1M1	14 (2.2)	3.62 (1.24-10.59)		0.02
Grade	n(%)				Grade	n(%)				Grade	n(%)				Grade	n(%)				Grade	n(%)
Grade1	64 (8.1)	1.03 (0.66-1.61)		0.9	Grade1	64 (16.6)	1.18 (0.54-2.60)		0.68	Grade1	82 (17.4)	0.89 (0.52-1.52)		0.67						Grade1	82 (17.4)	0.47 (0.24-0.95)		0.04
Grade2	261 (33.0)	0.87 (0.59-1.28)		0.49	Grade2	261 (67.8)	1.12 (0.54-2.30)		0.77	Grade2	278 (42.8)	0.92 (0.62-1.37)		0.67	Grade2	115 (74.2)	0.53 (0.31-0.92)		0.02	Grade2	163 (34.5)	0.55 (0.30-0.99)		0.05
Grade3	52 (6.6)	0.000000009 (0.00-Inf)		0.99	Grade3	52 (13.5)	0.00000007 (0.00-inf)		0.99	Grade3	137 (21.1)	1.84 (1.21-2.80)		0.005	Grade3	40 (25.8)	1.88 (1.09-3.22)		0.02	Grade3	97 (20.6)	1.23 (0.68-2.22)		0.50
Stage	n(%)				Stage	n(%)				Stage	n(%)				Stage	n(%)				Stage	n(%)
stage1	46 (5.8)	0.37 (0.18-0.78)		0.009	stage1	46 (11.9)	ref.			stage1		NA			stage1					stage1
stage2	243 (30.8)	0.20 (0.09-0.41)		1.38e-05	stage2	243 (63.1)	0.25 (0.20-0.36)		5.63e-13	stage2	24 (3.7)	2.76 (1.03-7.42)		0.04	stage2					stage2	24 (5.1)	ref.
stage3	48 (6.1)	0.02 (0.009-0.06)		< 2e-16	stage3	48 (12.5)	0.23 (0.13-0.39)		1.02e-07	stage3	16 (2.5)	2.17 (0.65-7.30)		0.21	stage3	8 (5.2)	ref.			stage3	8 (1.7)	0.00000007 (0.00-inf)		1.0
stage4	48 (6.1)	7.844e-08 (0.0-Inf)		0.99	stage4	48 (12.5)	0.000000006 (0.00-inf)		0.99	stage4	505 (77.8)	2.11 (1.03-4.30)		0.04	stage4	147 (94.8)	0.50 (0.18-1.43)		0.20	stage4	358 (75.8)	0.61 (0.30-1.28)		0.19
Markers	median±SE				Markers	median±SE				Markers	median±SE				Markers	median±SE				Markers	median±SE
TIPRL	-0.06±0.02	1.36 (1.04-1.78)		0.02	TIPRL	-0.08±0.02	1.48 (1.08-2.02)		0.01	TIPRL	-0.03±0.03	1.53 (1.26-1.87)		2.46e-05	TIPRL	0.01±0.06	1.44 (1.02-2.05)		0.04	TIPRL	-0.48±0.03	1.57 (1.17-2.11)		0.003
LC3	-0.09±0.02	0.60 (0.42-0.86)		0.005	LC3	-0.27±0.03	1.21 (0.76-1.92)		0.43	LC3	-0.1±0.02	1.04 (0.83-1.31)		0.72	LC3	0.21±0.05	0.63 (0.40-0.97)		0.04	LC3	-0.27±0.03	1.23 (0.88-1.71)		0.22
CD133	-0.02±0.02	1.50 (0.96-2.34)		0.07	CD133	0.21±0.03	3.75 (2.16-6.49)		2.52e-06	CD133	0.006±0.04	1.52 (1.01-2.10)		0.01	CD133	0.24±0.05	0.19 (0.09-0.41)		2.49e-05	CD133	-0.32±0.05	4.84 (2.89-8.40)		2.19e-08
CD44	-0.07±0.02	1.21 (0.91-1.61)		0.19	CD44	0.22±0.02	1.32 (0.99-1.76)		0.06	CD46	-0.1±0.03	0.92 (0.63-1.34)		0.67	CD46	-0.13±0.06	0.66 (0.40-1.10)		0.11	CD46	-0.06±0.04	1.66 (1.14-2.41)		0.008
