# Supplementary material for: The Human TOR Signaling Regulator Is the Key Indicator of Liver Cancer Patients’ Overall Survival: TIPRL/LC3/CD133/CD44 as Potential Biomarkers for Early Liver Cancers
Source: Cancers (Basel). 2021 Jun 11;13(12):2925. doi: 10.3390/cancers13122925 (PMC8230774; doi:10.3390/cancers13122925)
Supplement: Supplementary file 1 [file cancers-13-02925-s001.zip › Table S6.xlsx]

## Sheet: Sheet1
Table S6. Diagnostic and prognostic efficiencies of the variables in human liver disease
Liver disease	Diagnosis								Prognostic
	AUC (95% CI, %)				cut-off (95% CI, %)				AUC (95% CI, %)				cut-off (95% CI, %)
TIPRL	51.9%, p = 0.6	Sensitivity	53.6 (39.7-67.0)		-0.06	Sensitivity	50.0 (36.3-63.7)		76.1%, p < 0.0001	Sensitivity	36.2 (33.2-39.2)		-0.0007	Sensitivity	100 (99.6-100.0)
		Specificity	53.4 (50.3-56.5)			Specificity	60.7 (57.6-63.8)			Specificity	63.7 (60.7-66.7)			Specificity	63.7 (60.7-66.7)
LC3	55.6%, p = 0.2	Sensitivity	57.1 (43.2-70.3)		-0.25	Sensitivity	80.4 (67.6-89.8)		72.7%, p < 0.0001	Sensitivity	100 (99.6-100)		-0.0002	Sensitivity	100 (99.6-100)
		Specificity	49.0 (45.9-52.2)			Specificity	35.1 (32.1-38.1)			Specificity	49.0 (45.9-52.2)			Specificity	49.0 (45.9-52.2)
CD133	55.6%, p = 0.2	Sensitivity	78.6 (65.6-88.4)		-0.19	Sensitivity	91.1 (80.4-97.0)		70.2%, p < 0.0001	Sensitivity	36.2 (33.2-39.2)		-0.0006	Sensitivity	100 (99.6-100.0)
		Specificity	28.8 (26.0-31.7)			Specificity	23.1 (20.5-25.8)			Specificity	78.8 (76.1-81.3)			Specificity	28.8 (26.0-31.7)
CD44	62.8%, p = 0.08	Sensitivity	56.3 (29.9-80.3)		-0.36	Sensitivity	93.8 (69.8-99.8)		79.9%, p < 0.0001	Sensitivity	36.2 (33.2-39.2)		-0.003	Sensitivity	100 (99.3-100.0)
		Specificity	63.2 (58.3-68.0)			Specificity	39.1 (34.2-44.1)			Specificity	69.7 (64.8-74.2)			Specificity	69.2 (64.3-73.7)
CD46	50.2%%, p = 1.0	Sensitivity	80.0 (64.4-91.0)		0.24	Sensitivity	95.0 (83.1-99.4)		70.2%, p < 0.0001	Sensitivity	36.2 (33.2-39.2)		-0.0008	Sensitivity	100 (99.6-100.0)
		Specificity	21.2 (18.0-24.7)			Specificity	14.6 (11.9-17.7)			Specificity	78.8 (75.4-82.0)			Specificity	28.4 (24.9-32.2)
TIPRL/LC3/CD133	54.2%, p = 0.06	Sensitivity	58.9 (51.1-66.5)		-0.26	Sensitivity	76.8 (69.7-82.9)		73.0%, p < 0.0001	Sensitivity	100 (99.6-100)		-0.0002	Sensitivity	100 (99.6-100.0)
		Specificity	47.1 (45.3-48.9)			Specificity	34.1 (32.4-35.9)			Specificity	47.1 (45.3-48.9)			Specificity	47.2 (45.4-49.0)
TIPRL/LC3/CD133/CD44	54.0%, p = 0.07	Sensitivity	57.1 (49.6-64.3)		-0.25	Sensitivity	77.2 (70.4-83.0)		73.0%, p < 0.0001	Sensitivity	100 (99.6-100)		-0.0002	Sensitivity	100 (99.6-100.0)
		Specificity	47.2 (45.4-49.0)			Specificity	34.3 (32.6-36.1)			Specificity	47.2 (45.4-49.0)			Specificity	47.3 (45.5-49.1)
TIPRL/LC3/CD133/CD44/CD46	53.5%, p = 0.08	Sensitivity	59.4 (52.6-65.9)		-0.25	Sensitivity	79.0 (73.1-84.2)		72.5%, p < 0.0001	Sensitivity	100 (99.6-100)		-0.0002	Sensitivity	100 (99.6-100.0)
		Specificity	44.0 (42.4-45.7)			Specificity	31.8 (30.3-33.3)			Specificity	44.0 (42.4-45.6)			Specificity	44.1 (42.5-45.8)
