# Supplementary material for: The Human TOR Signaling Regulator Is the Key Indicator of Liver Cancer Patients’ Overall Survival: TIPRL/LC3/CD133/CD44 as Potential Biomarkers for Early Liver Cancers
Source: Cancers (Basel). 2021 Jun 11;13(12):2925. doi: 10.3390/cancers13122925 (PMC8230774; doi:10.3390/cancers13122925)
Supplement: Supplementary file 1 [file cancers-13-02925-s001.zip › Table S7.xlsx]

## Sheet: Sheet1
Table S7. The significant association between the variables excluding CD46 in human liver cancer
A. Training					B. Validation
Markers (n=394)	TIPRL	LC3	CD133	CD44	Markers (n=545)	TIPRL	LC3	CD133	CD46
Spearman r					Spearman r
TIPRL	1	0.36, p < 0.0001	0.19, p < 0.0001	0.42, p < 0.0001	TIPRL	1	0.89, p < 0.0001	0.53, p < 0.0001	ns
LC3		1	0.11, p = 0.07	0.47, p < 0.0001	LC3		1	0.64, p < 0.0001	0.15, p < 0.0001
CD133			1	0.43, p < 0.0001	CD133			1	ns
CD44				1	CD46				1
