# Supplementary material for: The Human TOR Signaling Regulator Is the Key Indicator of Liver Cancer Patients’ Overall Survival: TIPRL/LC3/CD133/CD44 as Potential Biomarkers for Early Liver Cancers
Source: Cancers (Basel). 2021 Jun 11;13(12):2925. doi: 10.3390/cancers13122925 (PMC8230774; doi:10.3390/cancers13122925)
Supplement: Supplementary file 1 [file cancers-13-02925-s001.zip › Table S8.xlsx]

## Sheet: Sheet1
Table 2. The significant efficiency of TIPRL, LC3, CD133, and CD44, as the prognostic marker and for detecting HCCs.
a.					b.					c.
Variables	Overall survival				Variables	chi-square	df	p value		Markers (n=790)	TIPRL	LC3	CD133	CD44
	Univariate				TIPRL	27.57	1	1.5E-07		Spearman r
	HR (95%CI)		P*		LC3	1.26	1	0.26		TIPRL	1	0.47, p < 0.0001	0.28, p < 0.0001	0.48, p < 0.0001
Subtypes					CD133	0.51	1	0.48		LC3		1	0.23, p < 0.0001	0.65, p < 0.0001
Hepatocellular carcinoma	0.21 (0.10-0.41)		8.31e-06		CD44	0.21	1	0.65		CD133			1	0.48, p < 0.0001
Chronic hepatitis	0.43 (0.25-0.74)		0.002		Diagnosis	144.04	5	<2E-16		CD44				1
Cirrhosis	1.91 (1.05-3.47)		0.04		TNM	4.71	6	0.58
Hepatic steatosis	2.32 (1.14-4.71)		0.02		Global	181.80	15	<2E-16
Liver cell/tissue degeneration, Inflammation of portal area	NA		NA
Normal liver tissue	ref				d.
TNM					Liver cancers	Diagnostic						prognostic
T1N0M0	5.68 (3.10-10.40)		1.88e-08			AUC (95% CI, %)			cut-off (95% CI, %)			AUC (95% CI, %)			cut-off (95% CI, %)
T2N0M0	3.84 (2.29-6.45)		3.64e-07		TIPRL	61.1% (0.46-0.76), p = 0.21	Sensitivity	54.6 (23.4-83.3)	0.05	Sensitivity	63.6 (30.8-89.1)	75.3 % (0.72-0.79), p < 0.0001	Sensitivity	43.9 (38.9-49.0)	.-0.0006527	Sensitivity	100 (99.5-100)
T2N1M0	NA						Specificity	61.0 (56.0-65.9)		Specificity	61.0 (56.0-66.0)		Specificity	56.6 (51.5-61.6)		Specificity	56.2 (52.7-59.7)
T2N0M1	2.2E-06 (0.0-Inf)		0.99		LC3	65.1 % (0.48-0.82), p = 0.09	Sensitivity	36.4 (10.9-69.2)	0.37	Sensitivity	36.4 (10.9-69.2)	77.7 % (0.75-0.81), p < 0.0001	Sensitivity	43.9 (38.9-49.0)	0.98	Sensitivity	43.9 (38.9-49.0)
T3N0M0	NA						Specificity	86.2 (82.4-89.5)		Specificity	96.1 (93.7-97.8)		Specificity	86.2 (82.4-89.5)		Specificity	98.7 (97.0-99.6)
T4N0M0	NA				CD133	73.1 % (0.61-0.86), p = 0.009	Sensitivity	36.4 (10.9-69.2)	-0.0006	Sensitivity	100 (71.5-100)	77.3 % (0.74-0.81), p < 0.0001	Sensitivity	43.9 (38.9-49.0)	0.97	Sensitivity	43.9 (38.9-49.0)
Markers							Specificity	85.5 (81.5-88.8)		Specificity	35.3 (30.6-40.3)		Specificity	85.5 (81.5-88.8)		Specificity	99.0 (97.4-99.7)
TIPRL	2.06 (1.52-2.79)		2.77e-06		CD44	62.3 % (0.52-0.72), p = 0.16	Sensitivity	54.6 (23.4-83.3)	-0.36	Sensitivity	100 (71.5-100)	82.5 % (0.79-0.86), p < 0.0001	Sensitivity	43.9 (38.9-49.0)	-0.003	Sensitivity	100 (99.0-100)
LC3	0.29 (0.17-0.51)		1.6e-05				Specificity	59.7 (54.7-64.7)		Specificity	83.2 (33.3-43.2)		Specificity	69.9 (65.0-74.4)		Specificity	69.6 (64.8-74.2)
CD133	0.63 (0.37-1.06)		0.08		TIPRL/LC3/CD133	67.0 % (0.58-0.76), p = 0.0009	Sensitivity	54.6 (23.4-83.3)	0.3	Sensitivity	36.4 (20.4-54.9)	76.8 % (0.75-0.79), p < 0.0001	Sensitivity	43.9 (41.0-46.8)	-0.0006	Sensitivity	100 (99.7-100)
CD44	2.23 (1.41-3.51)		0.0006				Specificity	59.7 (54.7-64.7)		Specificity	89.4 (87.4-91.1)		Specificity	76.1 (73.5-78.5)		Specificity	42.8 (39.9-45.7)
					TIPRL/LC3/CD133/CD44	64.8 % (0.56-0.72), p = 0.0008	Sensitivity	43.2 (28.4-59.0)	-0.36	Sensitivity	100 (92.0-100.0)	78.0 % (1.0-1.0), p < 0.0001	Sensitivity	43.8 (41.0-46.7)	-0.0006	Sensitivity	99.4 (98.8-99.8)
							Specificity	74.5 (72.2-76.6)		Specificity	25.3 (23.1-27.5)		Specificity	74.5 (72.2-76.6)		Specificity	49.5 (47.0-52.0)

## Sheet: cancer
Table 2. The significant efficiency of TIPRL, LC3, CD133, and CD44, as the prognostic marker and for detecting HCCs.
A. Training
Variables	Overall survival			B. Variables	chi-square	df	p value	C. Markers (n=394)	TIPRL	LC3	CD133	CD44
	Multivariate			TIPRL	27.57	1	1.5E-07	Spearman
	HR (95%CI)		P*	LC3	1.26	1	0.26	TIPRL	1	0.36, p < 0.0001	0.19, p < 0.0001	0.42, p < 0.0001
Subtypes				CD133	0.51	1	0.48	LC3		1	0.11, p = 0.07	0.47, p < 0.0001
Hepatocellular carcinoma	0.21 (0.10-0.41)		8.31e-06	CD44	0.21	1	0.65	CD133			1	0.43, p < 0.0001
Chronic hepatitis	0.43 (0.25-0.74)		0.002	Diagnosis	144.04	5	<2E-16	CD44				1
Cirrhosis	1.91 (1.05-3.47)		0.04	TNM	4.71	6	0.58
Hepatic steatosis	2.32 (1.14-4.71)		0.02	Global	181.80	15	<2E-16
Liver cell/tissue degeneration, Inflammation of portal area	NA		NA	D. Liver cancers	Diagnostic						prognostic
Normal liver tissue	ref				AUC (95% CI, %)			cut-off (95% CI, %)			AUC (95% CI, %)			cut-off (95% CI, %)
TNM				TIPRL	61.1% (0.46-0.76), p = 0.21	Sensitivity	54.6 (23.4-83.3)	0.05	Sensitivity	63.6 (30.8-89.1)	75.3 % (0.72-0.79), p < 0.0001	Sensitivity	43.9 (38.9-49.0)	.-0.0006527	Sensitivity	100 (99.5-100)
T1N0M0	5.68 (3.10-10.40)		1.88e-08			Specificity	61.0 (56.0-65.9)		Specificity	61.0 (56.0-66.0)		Specificity	56.6 (51.5-61.6)		Specificity	56.2 (52.7-59.7)
T2N0M0	3.84 (2.29-6.45)		3.64e-07	LC3	65.1 % (0.48-0.82), p = 0.09	Sensitivity	36.4 (10.9-69.2)	0.37	Sensitivity	36.4 (10.9-69.2)	77.7 % (0.75-0.81), p < 0.0001	Sensitivity	43.9 (38.9-49.0)	0.98	Sensitivity	43.9 (38.9-49.0)
T2N1M0	NA					Specificity	86.2 (82.4-89.5)		Specificity	96.1 (93.7-97.8)		Specificity	86.2 (82.4-89.5)		Specificity	98.7 (97.0-99.6)
T2N0M1	2.2E-06 (0.0-Inf)		0.99	CD133	73.1 % (0.61-0.86), p = 0.009	Sensitivity	36.4 (10.9-69.2)	-0.0006	Sensitivity	100 (71.5-100)	77.3 % (0.74-0.81), p < 0.0001	Sensitivity	43.9 (38.9-49.0)	0.97	Sensitivity	43.9 (38.9-49.0)
T3N0M0	NA					Specificity	85.5 (81.5-88.8)		Specificity	35.3 (30.6-40.3)		Specificity	85.5 (81.5-88.8)		Specificity	99.0 (97.4-99.7)
T4N0M0	NA			CD44	62.3 % (0.52-0.72), p = 0.16	Sensitivity	54.6 (23.4-83.3)	-0.36	Sensitivity	100 (71.5-100)	82.5 % (0.79-0.86), p < 0.0001	Sensitivity	43.9 (38.9-49.0)	-0.003	Sensitivity	100 (99.0-100)
Markers						Specificity	59.7 (54.7-64.7)		Specificity	83.2 (33.3-43.2)		Specificity	69.9 (65.0-74.4)		Specificity	69.6 (64.8-74.2)
TIPRL	2.06 (1.52-2.79)		2.77e-06	TIPRL/LC3/CD133	67.0 % (0.58-0.76), p = 0.0009	Sensitivity	54.6 (23.4-83.3)	0.3	Sensitivity	36.4 (20.4-54.9)	76.8 % (0.75-0.79), p < 0.0001	Sensitivity	43.9 (41.0-46.8)	-0.0006	Sensitivity	100 (99.7-100)
LC3	0.29 (0.17-0.51)		1.6e-05			Specificity	59.7 (54.7-64.7)		Specificity	89.4 (87.4-91.1)		Specificity	76.1 (73.5-78.5)		Specificity	42.8 (39.9-45.7)
CD133	0.63 (0.37-1.06)		0.08	TIPRL/LC3/CD133/CD44	64.8 % (0.56-0.72), p = 0.0008	Sensitivity	43.2 (28.4-59.0)	-0.36	Sensitivity	100 (92.0-100.0)	78.0 % (1.0-1.0), p < 0.0001	Sensitivity	43.8 (41.0-46.7)	-0.0006	Sensitivity	99.4 (98.8-99.8)
CD44	2.23 (1.41-3.51)		0.0006			Specificity	74.5 (72.2-76.6)		Specificity	25.3 (23.1-27.5)		Specificity	74.5 (72.2-76.6)		Specificity	49.5 (47.0-52.0)

## Sheet: Sheet2
Table 2. The significant efficiency of TIPRL, LC3, CD133, and CD44, as the prognostic marker and for detecting HCCs.
A. Training				B. Validation
Variables	Overall survival			Variables	Disease-specific survival
	Multivariate				Multivariate
	HR (95%CI)		P*		HR (95%CI)		P*
Subtypes				Subtypes
Hepatocellular carcinoma	0.21 (0.10-0.41)		8.31e-06	Hepatocellular carcinoma	6.89 (2.18-21.79)		0.001
Chronic hepatitis	0.43 (0.25-0.74)		0.002	Intrahepatic cholangiocarcinoma	5.25 (1.74-15.85)		0.003
Cirrhosis	1.91 (1.05-3.47)		0.04	Mixed carcinoma	5.13 (1.53-17.23)		0.008
Hepatic steatosis	2.32 (1.14-4.71)		0.02	Carcinoid	59.86 (13.81-259.43)		4.53E-08
Liver cell/tissue degeneration, Inflammation of portal area	NA		NA	Adenosquamous carcinoma	4.46 (1.10-18.08)		0.04
Normal liver tissue	ref			Cancer adjacent liver tissue	ref
TNM				TNM
T1N0M0	5.68 (3.10-10.40)		1.88e-08	T2N0M0	2.25 (0.83-6.11)		0.11
T2N0M0	3.84 (2.29-6.45)		3.64e-07	T2N1M0	2.64 (1.22-5.71)		0.01
T2N1M0	NA			T3N0M0	3.04 (0.86-10.76)		0.08
T2N0M1	2.2E-06 (0.0-Inf)		0.99	T3N1M0	2.10 (1.01-4.37)		0.05
T3N0M0	NA			T3N0M1	7.71 (2.79-21.29)		8.13E-05
T4N0M0	NA			T3N1M1	1.70 (0.21-13.70)		0.62
				T4N1M0	1.49 (0.44-5.04)		0.52
				T4N1M1	4.15 (1.37-12.55)		0.01
				Grade
				Grade1	0.63 (0.33-1.21)		0.17
				Grade2	0.57 (0.32-1.01)		0.06
				Grade3	1.22 (0.69-2.16)		0.50
				Stage
				stage1	NA
				stage2	2.13 (0.78-5.78)		0.14
				stage3	2.67 (0.76-9.39)		0.13
				stage4	2.27 (1.10-4.69)		0.03
Markers				Markers
TIPRL	2.06 (1.52-2.79)		2.77e-06	TIPRL	14.65 (8.34-25.74)		<2E-16
LC3	0.29 (0.17-0.51)		1.6e-05	LC3	0.03 (0.02-0.07)		<2E-16
CD133	0.63 (0.37-1.06)		0.08	CD133	3.56 (2.17-5.84)		4.7e-07
CD44	2.23 (1.41-3.51)		0.0006	CD46	2.13 (1.47-3.08)		6.16e-05

## Sheet: Sheet3
A. Training				B. Validation
Variables	chi-square	df	p value	Variables	chi-square	df	p value
TIPRL	27.57	1	1.5E-07	TIPRL	0.58	1	0.45
LC3	1.26	1	0.26	LC3	3.31	1	0.07
CD133	0.51	1	0.48	CD133	0.15	1	0.70
CD44	0.21	1	0.65	CD46	0.49	1	0.48
Diagnosis	144.04	5	<2E-16	Diagnosis	27.09	5	5.5E-05
TNM	4.71	6	0.58	TNM	37.66	7	3.5E-06
Global	181.80	15	<2E-16	Grade	4.72	3	0.19
				Stage	12.33	3	0.006
				Global	99.60	19	6.3E-13

## Sheet: Sheet4
A. Training					B. Validation
Markers (n=394)	TIPRL	LC3	CD133	CD44	Markers (n=545)	TIPRL	LC3	CD133	CD46
Spearman					Spearman r
TIPRL	1	0.36, p < 0.0001	0.19, p < 0.0001	0.42, p < 0.0001	TIPRL	1	0.89, p < 0.0001	0.53, p < 0.0001	ns
LC3		1	0.11, p = 0.07	0.47, p < 0.0001	LC3		1	0.64, p < 0.0001	0.15, p < 0.0001
CD133			1	0.43, p < 0.0001	CD133			1	ns
CD44				1	CD46				1

## Sheet: Sheet5
Table S8. The prominent prognostic ability of the variables in human liver cancer
A. Training
Liver cancers	Diagnostic						Prognostic
	AUC (95% CI, %)			cut-off (95% CI, %)			AUC (95% CI, %)			cut-off (95% CI, %)
TIPRL	61.1% (0.46-0.76), p = 0.21	Sensitivity	54.6 (23.4-83.3)	0.05	Sensitivity	63.6 (30.8-89.1)	75.3 % (0.72-0.79), p < 0.0001	Sensitivity	43.9 (38.9-49.0)	.-0.0006527	Sensitivity	100 (99.5-100)
		Specificity	61.0 (56.0-65.9)		Specificity	61.0 (56.0-66.0)		Specificity	56.6 (51.5-61.6)		Specificity	56.2 (52.7-59.7)
LC3	65.1 % (0.48-0.82), p = 0.09	Sensitivity	36.4 (10.9-69.2)	0.37	Sensitivity	36.4 (10.9-69.2)	77.7 % (0.75-0.81), p < 0.0001	Sensitivity	43.9 (38.9-49.0)	0.98	Sensitivity	43.9 (38.9-49.0)
		Specificity	86.2 (82.4-89.5)		Specificity	96.1 (93.7-97.8)		Specificity	86.2 (82.4-89.5)		Specificity	98.7 (97.0-99.6)
CD133	73.1 % (0.61-0.86), p = 0.009	Sensitivity	36.4 (10.9-69.2)	-0.0006	Sensitivity	100 (71.5-100)	77.3 % (0.74-0.81), p < 0.0001	Sensitivity	43.9 (38.9-49.0)	0.97	Sensitivity	43.9 (38.9-49.0)
		Specificity	85.5 (81.5-88.8)		Specificity	35.3 (30.6-40.3)		Specificity	85.5 (81.5-88.8)		Specificity	99.0 (97.4-99.7)
CD44	62.3 % (0.52-0.72), p = 0.16	Sensitivity	54.6 (23.4-83.3)	-0.36	Sensitivity	100 (71.5-100)	82.5 % (0.79-0.86), p < 0.0001	Sensitivity	43.9 (38.9-49.0)	-0.003	Sensitivity	100 (99.0-100)
		Specificity	59.7 (54.7-64.7)		Specificity	83.2 (33.3-43.2)		Specificity	69.9 (65.0-74.4)		Specificity	69.6 (64.8-74.2)
TIPRL/LC3/CD133	67.0 % (0.58-0.76), p = 0.0009	Sensitivity	54.6 (23.4-83.3)	0.3	Sensitivity	36.4 (20.4-54.9)	76.8 % (0.75-0.79), p < 0.0001	Sensitivity	43.9 (41.0-46.8)	-0.0006	Sensitivity	100 (99.7-100)
		Specificity	59.7 (54.7-64.7)		Specificity	89.4 (87.4-91.1)		Specificity	76.1 (73.5-78.5)		Specificity	42.8 (39.9-45.7)
TIPRL/LC3/CD133/CD44	64.8 % (0.56-0.72), p = 0.0008	Sensitivity	43.2 (28.4-59.0)	-0.36	Sensitivity	100 (92.0-100.0)	78.0 % (1.0-1.0), p < 0.0001	Sensitivity	43.8 (41.0-46.7)	-0.0006	Sensitivity	99.4 (98.8-99.8)
		Specificity	74.5 (72.2-76.6)		Specificity	25.3 (23.1-27.5)		Specificity	74.5 (72.2-76.6)		Specificity	49.5 (47.0-52.0)
B. Validation
Liver cancers	Diagnostic						Prognostic
	AUC (95% CI, %)			cut-off (95% CI, %)			AUC (95% CI, %)			cut-off (95% CI, %)
TIPRL	52.9% (0.44-0.62), p = 0.54	Sensitivity	55.0 (38.5-70.7)	-0.05	Sensitivity	40.0 (24.9-56.7)	78.8 % (0.76-0.82), p < 0.0001	Sensitivity	32.3 (28.4-36.4)	-0.008	Sensitivity	100 (99.3-100)
		Specificity	54.3 (50.0-58.6)		Specificity	68.8 (64.7-72.7)		Specificity	70.8 (66.8-74.6)		Specificity	70.3 (66.2-74.1)
LC3	54.0 % (0.46-0.62), p = 0.40	Sensitivity	52.5 (36.1-68.5)	-0.25	Sensitivity	70.0 (53.5-83.4)	71.2 % (0.68-0.74), p < 0.0001	Sensitivity	32.3 (28.4-36.4)	-0.0002	Sensitivity	100 (99.3-100)
		Specificity	53.8 (49.5-58.0)		Specificity	43.1 (38.9-47.4)		Specificity	59.3 (55.0-63.4)		Specificity	59.1 (54.8-63.2)
CD133	51.0 % (0.42-0.59), p = 0.84	Sensitivity	25.0 (12.7-41.2)	-0.2	Sensitivity	87.5 (73.2-95.8)	66.7 % (0.63-0.70), p < 0.0001	Sensitivity	32.3 (28.4-36.4)	-0.002	Sensitivity	100 (99.3-100)
		Specificity	75.6 (71.8-79.2)		Specificity	22.9 (19.5-26.7)		Specificity	75.6 (71.8-79.2)		Specificity	26.1 (22.4-30.0)
CD46	50.1 % (0.42-0.59), p = 0.98	Sensitivity	20.0 (9.1-35.7)	-0.28	Sensitivity	90.0 (76.3-97.2)	68.8 % (0.66-0.72), p < 0.0001	Sensitivity	32.3 (28.4-36.4)	-0.0008	Sensitivity	100 (99.3-100)
		Specificity	79.1 (75.4-82.4)		Specificity	18.2 (15.0-21.7)		Specificity	79.1 (75.4-82.4)		Specificity	28.6 (24.9-32.6)
TIPRL/LC3/CD133	53.2 % (0.48-0.58), p = 0.25	Sensitivity	53.3 (44.0-62.5)	-0.26	Sensitivity	70.0 (61.0-78.0)	72.2 % (0.33-1.12), p < 0.0001	Sensitivity	32.3 (30.0-34.6)	-0.002	Sensitivity	100 (99.8-100)
		Specificity	51.7 (49.3-54.2)		Specificity	40.7 (38.3-43.1)		Specificity	68.3 (66.0-70.6)		Specificity	51.7 (49.2-54.1)
TIPRL/LC3/CD133/CD46	52.7 % (0.49-0.57), p = 0.25	Sensitivity	32.5 (25.3-40.4)	-0.23	Sensitivity	73.8 (66.2-80.4)	71.4 % (0.61-0.81), p < 0.0001	Sensitivity	32.3 (30.3-34.3)	-0.0002	Sensitivity	100 (99.8-100)
		Specificity	71.0 (69.1-72.9)		Specificity	36.2 (34.2-38.3)		Specificity	71.0 (69.1-72.9)		Specificity	46.0 (43.9-48.1)
