# Supplementary material for: The Human TOR Signaling Regulator Is the Key Indicator of Liver Cancer Patients’ Overall Survival: TIPRL/LC3/CD133/CD44 as Potential Biomarkers for Early Liver Cancers
Source: Cancers (Basel). 2021 Jun 11;13(12):2925. doi: 10.3390/cancers13122925 (PMC8230774; doi:10.3390/cancers13122925)
Supplement: Supplementary file 1 [file cancers-13-02925-s001.zip › Table S9.xlsx]

## Sheet: Sheet8
Table S9. Diagnostic and prognostic efficiencies of the variables in human iCCA
iCCA	Diagnostic
	AUC (95% CI, %)				cut-off (95% CI, %)
TIPRL	57.3%, (0.49-0.66), p = 0.09	Sensitivity	51.0 (36.6-65.3)		-0.66	Sensitivity	29.4 (17.5-43.8)
		Specificity	50.8 (46.4-55.1)			Specificity	88.6 (85.6-91.2)
LC3	51.8%, (0.43-0.61), p = 0.67	Sensitivity	47.1 (32.9-61.5)		0.04	Sensitivity	45.1 (31.1-59.7)
		Specificity	72.4 (68.4-76.1)			Specificity	73.3 (69.4-77.0)
CD133	55.1%, (0.47-0.63), p = 0.23	Sensitivity	27.5 (15.9-41.7)		-0.2	Sensitivity	90.2 (78.6-96.7)
		Specificity	78.5 (74.8-82.0)			Specificity	20.7 (17.4-24.4)
CD44	62.3%, (0.52-0.72), p = 0.16	Sensitivity	54.6 (23.4-83.2)		-0.36	Sensitivity	100 (71.5-100)
		Specificity	59.7 (54.7-64.6)			Specificity	38.4 (33.6-43.5)
CD46	52.6%, (0.43-0.62), p = 0.61	Sensitivity	20.0 (9.10-35.7)		-0.29	Sensitivity	92.5 (79.6-98.4)
		Specificity	82.1 (75.1-87.9)			Specificity	18.5 (12.7-25.7)
iCCA	Prognostic
	AUC (95% CI, %)				cut-off (95% CI, %)
TIPRL	72.7%, (0.70-0.76), p < 0.0001	Sensitivity	43.2 (38.9-47.5)		-0.0007	Sensitivity	100 (99.3-100)
		Specificity	54.8 (50.5-59.1)			Specificity	54.6 (50.3-58.9)
LC3	72.3%, (0.69-0.75), p < 0.0001	Sensitivity	43.2 (38.9-47.5)		1	Sensitivity	43.2 (38.9-47.5)
		Specificity	72.0 (68.1-75.8)			Specificity	96.1 (94.1-97.6)
CD133	73.3%, (0.70-0.76), p < 0.0001	Sensitivity	43.2 (38.9-47.5)		0.97	Sensitivity	43.2 (38.9-47.5)
		Specificity	78.7 (75.0-82.1)			Specificity	99.1 (97.9-99.7)
CD44	82.3%, (0.79-0.85), p < 0.0001	Sensitivity	43.2 (38.9-47.5)		-0.003	Sensitivity	100 (99.3-100)
		Specificity	69.9 (65.0-74.4)			Specificity	69.6 (64.8-74.2)
CD46	75.6%, (0.71-0.80), p < 0.0001	Sensitivity	43.2 (38.9-47.5)		-0.004	Sensitivity	100 (99.3-100)
		Specificity	82.6 (75.7-88.2)			Specificity	31.6 (24.4-39.6)
