# Supplementary material for: The Human TOR Signaling Regulator Is the Key Indicator of Liver Cancer Patients’ Overall Survival: TIPRL/LC3/CD133/CD44 as Potential Biomarkers for Early Liver Cancers
Source: Cancers (Basel). 2021 Jun 11;13(12):2925. doi: 10.3390/cancers13122925 (PMC8230774; doi:10.3390/cancers13122925)
Supplement: Supplementary file 1 [file cancers-13-02925-s001.zip › Table S10.xlsx]

## Sheet: Sheet1
Table S10. Diagnostic and prognostic efficiencies of the variables in human HCCs
HCC	Diagnostic
	AUC (95% CI, %)				cut-off (95% CI, %)
TIPRL	59.1%, (0.50-0.68), p = 0.06	Sensitivity	60.0 (55.0-64.9)		-0.08	Sensitivity	76.4 (71.9-80.5)
		Specificity	57.5 (40.9-73.0)			Specificity	45.0 (29.3-61.5)
LC3	61.3%, (0.53-0.70), p = 0.02	Sensitivity	58.0 (52.9-62.9)		-0.25	Sensitivity	51.3 (46.2-56.4)
		Specificity	57.5 (40.9-73.0)			Specificity	72.5 (56.1-85.4)
CD133	55.7%, (0.47-0.64), p = 0.23	Sensitivity	81.0 (76.8-84.8)		-0.18	Sensitivity	29.0 (24.5-33.8)
		Specificity	25.0 (12.7-41.2)			Specificity	82.5 (67.2-92.7)
CD46	50.8%, (0.42-0.60), p = 0.86	Sensitivity	22.3 (18.3-26.8)		0.23	Sensitivity	15.1 (11.7-19.1)
		Specificity	80.0 (64.4-91.0)			Specificity	95.0 (83.1-99.4)
HCC	Prognostic
	AUC (95% CI, %)				cut-off (95% CI, %)
TIPRL	84.5%, (0.81-0.88), p < 0.0001	Sensitivity	28.7 (24.3-33.5)		-0.008	Sensitivity	100 (99.1-100)
		Specificity	78.7 (74.3-82.7)			Specificity	78.5 (74.0-82.4)
LC3	76.9%, (0.73-0.81), p < 0.0001	Sensitivity	100 (99.1-100)		-0.0002	Sensitivity	100 (99.1-100)
		Specificity	68.0 (63.1-72.6)			Specificity	68.0 (63.1-72.6)
CD133	68.8%, (0.65-0.72), p < 0.0001	Sensitivity	28.7 (24.3-33.5)		-0.001	Sensitivity	100 (99.1-100)
		Specificity	81.0 (76.8-84.8)			Specificity	31.3 (26.7-36.1)
CD46	66.2%, (0.62-0.70), p < 0.0001	Sensitivity	28.7 (24.3-33.5)		-0.0008	Sensitivity	100 (99.1-100)
		Specificity	77.7 (73.2-81.7)			Specificity	27.4 (23.1-32.2)
