# Supplementary material for: The Human TOR Signaling Regulator Is the Key Indicator of Liver Cancer Patients’ Overall Survival: TIPRL/LC3/CD133/CD44 as Potential Biomarkers for Early Liver Cancers
Source: Cancers (Basel). 2021 Jun 11;13(12):2925. doi: 10.3390/cancers13122925 (PMC8230774; doi:10.3390/cancers13122925)
Supplement: Supplementary file 1 [file cancers-13-02925-s001.zip › Table S11.xlsx]

## Sheet: Sheet1
Table S11. A cancer grade-dependent diagnostic and prognostic analyses of the variables in HCCs and iCCA
A														B
HCC/grade2	Diagnostic						Prognostic							iCCA/grade2	Diagnostic						Prognostic
	AUC (95% CI, %)			cut-off (95% CI, %)			AUC (95% CI, %)			cut-off (95% CI, %)					AUC (95% CI, %)			cut-off (95% CI, %)			AUC (95% CI, %)			cut-off (95% CI, %)
TIPRL	55.7% (0.47-0.64), p = 0.17	Sensitivity	50.0 (36.3-63.7)	-0.63	Sensitivity	26.8 (15.8-40.3)	72.0% (0.65-0.79), p < 0.0001	Sensitivity	100 (91.0-100)	-0.0007	Sensitivity	100 (91.0-100)		TIPRL	60.8% (0.52-0.69), p = 0.02	Sensitivity	62.5 (48.6-75.0)	-0.34	Sensitivity	69.6 (55.9-81.2)	81.5% (0.76-0.87), p < 0.0001	Sensitivity	100 (97.8-100)	-0.02	Sensitivity	100 (97.8-100)
		Specificity	49.1 (44.0-54.2)		Specificity	89.2 (85.7-92.2)		Specificity	55.9 (50.8-61.0)		Specificity	55.9 (50.8-61.0)				Specificity	63.8 (55.9-71.1)		Specificity	57.7 (49.7-65.4)		Specificity	76.1 (68.8-82.4)		Specificity	76.1 (68.8-82.4)
LC3	50.6 % (0.42-0.59), p = 0.89	Sensitivity	50.0 (35.2-64.8)	-0.25	Sensitivity	75.0 (60.4-86.4)	71.1 % (0.64-0.78), p < 0.0001	Sensitivity	100 (91.0-100)	-0.002	Sensitivity	100 (91.0-100)		LC3	59.7 % (0.51-0.68), p = 0.04	Sensitivity	56.3 (41.2-70.5)	-0.25	Sensitivity	75.0 (60.4-86.4)	74.0 % (0.68-0.80), p < 0.0001	Sensitivity	100 (97.8-100)	-0.0008	Sensitivity	100 (97.8-100)
		Specificity	51.4 (45.0-57.7)		Specificity	38.3 (32.2-44.6)		Specificity	55.8 (49.4-62.0)		Specificity	55.8 (49.4-62.0)				Specificity	56.4 (48.5-64.2)		Specificity	44.8 (37.0-52.8)		Specificity	66.3 (58.5-73.5)		Specificity	66.3 (58.5-73.5)
CD133	56.2 % (0.45-0.67), p = 0.29	Sensitivity	50.0 (30.7-69.4)	-0.19	Sensitivity	78.6 (59.1-91.7)	72.9 % (0.65-0.81), p < 0.0001	Sensitivity	100 (91.0-100)	-0.0006	Sensitivity	100 (91.0-100)		CD133	67.8 % (0.57-0.79), p = 0.005	Sensitivity	64.3 (44.1-81.4)	-0.2	Sensitivity	82.1 (63.1-93.9)	73.5 % (0.65-0.82), p < 0.0001	Sensitivity	100 (97.8-100)	-0.01	Sensitivity	100 (97.8-100)
		Specificity	56.6 (49.2-63.8)		Specificity	42.3 (35.2-49.7)		Specificity	56.6 (49.2-63.8)		Specificity	56.6 (49.2-63.8)				Specificity	64.2 (52.8-74.6)		Specificity	61.7 (50.3-72.3)		Specificity	65.4 (54.0-75.7)		Specificity	65.4 (54.0-75.7)
CD44	66.0 % (0.58-0.74), p = 0.03	Sensitivity	62.5 (35.4-84.8)	-0.37	Sensitivity	100 (79.4-100)	82.9 % (0.78-0.88), p < 0.0001	Sensitivity	100 (91.0-100)	-0.004	Sensitivity	100 (91.0-100)		CD46	62.4 % (0.51-0.74), p = 0.09	Sensitivity	60.0 (36.1-80.9)	-0.27	Sensitivity	80.0 (56.3-94.3)	74.8 % (0.67-0.83), p < 0.0001	Sensitivity	100 (97.8-100)	-0.004	Sensitivity	100 (97.8-100)
		Specificity	63.0 (57.5-68.3)		Specificity	41.6 (36.2-47.2)		Specificity	73.0 (67.8-77.8)		Specificity	73.0 (67.8-77.8)				Specificity	59.8 (48.3-70.4)		Specificity	51.3 (39.9-62.4)		Specificity	67.1 (55.8-77.1)		Specificity	67.1 (55.8-77.1)
TIPRL/LC3/CD133	50.8 % (0.45-0.56), p = 0.77	Sensitivity	53.0 (44.2-61.8)	-0.02	Sensitivity	50.8 (41.9-59.6)	73.4 % (0.69-0.77), p < 0.0001	Sensitivity	100 (96.9-100)	-0.0006	Sensitivity	100 (96.9-100)		TIPRL/LC3/CD133	62.0 % (0.57-0.67), p < 0.0001	Sensitivity	59.9 (51.0-68.3)	-0.25	Sensitivity	68.9 (60.3-76.7)	76.9 % (0.73-0.81), p < 0.0001	Sensitivity	100 (99.3-100)	-0.0008	Sensitivity	100 (99.3-100)
		Specificity	54.3 (50.7-57.9)		Specificity	57.0 (53.4-60.5)		Specificity	58.5 (54.9-62.1)		Specificity	58.5 (54.9-62.1)				Specificity	60.9 (56.0-65.7)		Specificity	56.0 (51.1-60.9)		Specificity	70.0 (65.3-74.4)		Specificity	70.0 (65.3-74.4)
TIPRL/LC3/CD133/CD46	54.2 % (0.49-0.59), p = 0.10	Sensitivity	54.7 (46.4-62.9)	-0.25	Sensitivity	71.0 (62.9-78.1)	76.2 % (0.73-0.79), p < 0.0001	Sensitivity	100 (98.4-100)	-0.0006	Sensitivity	100 (98.4-100)		TIPRL/LC3/CD133/CD46	61.4 % (0.56-0.67), p < 0.0001	Sensitivity	59.1 (50.2-67.6)	-0.25	Sensitivity	68.2 (59.5-76.0)	76.5 % (0.73-0.80), p < 0.0001	Sensitivity	100 (99.4-100)	-0.0008	Sensitivity	100 (99.4-100)
		Specificity	54.9 (51.9-51.9)		Specificity	41.3 (38.4-44.3)		Specificity	62.8 (59.9-65.7)		Specificity	62.8 (59.9-65.7)				Specificity	60.5 (56.0-64.9)		Specificity	55.4 (50.9-59.9)		Specificity	69.5 (65.2-73.6)		Specificity	69.5 (65.2-73.6)
iCCA/grade3	Diagnostic						Prognostic							iCCA/grade3	Diagnsotic						Prognostic
	AUC (95% CI, %)			cut-off (95% CI, %)			AUC (95% CI, %)			cut-off (95% CI, %)					AUC (95% CI, %)			cut-off (95% CI, %)			AUC (95% CI, %)			cut-off (95% CI, %)
TIPRL	59.9% (0.51-0.69), p = 0.04	Sensitivity	53.6 (39.7-67.0)	0.17	Sensitivity	78.6 (65.6-88.4)	63.7% (0.54-0.74), p = 0.01	Sensitivity	100 (91.0-100)	-0.02	Sensitivity	100 (91.0-100)		TIPRL	59.7% (0.50-0.69), p = 0.05	Sensitivity	57.1 (43.2-70.3)	-0.07	Sensitivity	50.0 (36.3-63.7)	84.7% (0.79-0.91), p < 0.0001	Sensitivity	100 (96.3-100)	-0.008	Sensitivity	100 (96.3-100)
		Specificity	52.2 (41.5-62.7)		Specificity	45.7 (35.2-56.4)		Specificity	47.8 (37.3-58.5)		Specificity	47.8 (37.3-58.5)				Specificity	57.7 (47.3-67.7)		Specificity	72.2 (62.1-80.8)		Specificity	76.3 (66.6-84.3)		Specificity	76.3 (66.6-84.3)
LC3	52.8 % (0.42-0.63), p = 0.61	Sensitivity	52.1 (37.2-66.7)	0.18	Sensitivity	70.8 (55.9-83.1)	63.4 % (0.53-0.74), p = 0.02	Sensitivity	100 (91.0-100)	-0.005	Sensitivity	100 (91.0-100)		LC3	53.7 % (0.44-0.63), p = 0.48	Sensitivity	52.1 (37.2-66.7)	-0.25	Sensitivity	75.0 (60.4-86.4)	72.0 % (0.64-0.80), p < 0.0001	Sensitivity	100 (96.3-100)	-0.02	Sensitivity	100 (96.3-100)
		Specificity	50.0 (37.4-62.6)		Specificity	43.9 (31.7-56.7)		Specificity	50.0 (37.4-62.6)		Specificity	50.0 (37.4-62.6)				Specificity	51.6 (41.2-61.8)		Specificity	44.3 (34.2-54.8)		Specificity	56.7 (46.3-66.7)		Specificity	56.7 (46.3-66.7)
CD133	57.3 % (0.44-0.71), p = 0.29	Sensitivity	64.3 (44.1-81.4)	-0.02	Sensitivity	64.3 (44.1-81.4)	77.8 % (0.67-0.88), p = 0.01	Sensitivity	100 (91.0-100)	-0.01	Sensitivity	100 (91.0-100)		CD133	58.0 % (0.45-0.71), p = 0.24	Sensitivity	60.7 (40.6-78.5)	0.2	Sensitivity	67.9 (47.7-84.1)	60.5 % (0.52-0.69), p = 0.01	Sensitivity	100 (99.1-100)	-0.002	Sensitivity	100 (99.1-100)
		Specificity	65.2 (49.8-78.7)		Specificity	65.2 (49.8-78.7)		Specificity	65.2 (49.8-78.7)		Specificity	65.2 (49.8-78.7)				Specificity	58.8 (44.2-72.4)		Specificity	54.9 (40.3-68.9)		Specificity	37.3 (24.1-51.9)		Specificity	37.3 (24.1-51.9)
CD44	55.7 % (0.44-0.67), p = 0.48	Sensitivity	56.3 (29.9-80.3)	0.23	Sensitivity	100 (79.4-100)	66.7 % (0.56-0.78), p = 0.004	Sensitivity	100 (91.0-100)	-0.01	Sensitivity	100 (91.0-100)		CD46	59.6 % (0.45-0.74), p = 0.22	Sensitivity	60.0 (36.1-80.9)	0.25	Sensitivity	90.0 (68.3-98.8)	64.5 % (0.54-0.75), p = 0.005	Sensitivity	100 (96.3-100)	-0.0008	Sensitivity	100 (96.3-100)
		Specificity	55.6 (43.4-67.3)		Specificity	34.7 (23.9-46.9)		Specificity	45.8 (34.0-58.0)		Specificity	45.8 (34.0-58.0)				Specificity	58.7 (43.2-73.0)		Specificity	43.5 (28.9-58.9)		Specificity	43.5 (28.9-58.9)		Specificity	43.5 (28.9-58.9)
TIPRL/LC3/CD133	54.0 % (0.48-0.60), p = 0.22	Sensitivity	48.5 (39.7-57.3)	-0.6	Sensitivity	18.2 (12.0-25.8)	66.8 % (0.61-0.73), p < 0.0001	Sensitivity	100 (96.9-100)	-0.005	Sensitivity	100 (96.9-100)		TIPRL/LC3/CD133	50.8 % (0.45-0.57), p = 0.79	Sensitivity	48.5 (39.7-57.3)	0.21	Sensitivity	73.5 (65.1-80.8)	74.7 % (0.70-0.79), p < 0.0001	Sensitivity	100 (98.7-100)	-0.002	Sensitivity	100 (98.7-100)
		Specificity	48.0 (41.0-55.1)		Specificity	84.3 (78.6-89.0)		Specificity	52.5 (45.4-59.5)		Specificity	52.5 (45.4-59.5)				Specificity	46.8 (40.4-53.4)		Specificity	35.0 (29.0-41.5)		Specificity	60.4 (54.0-66.6)		Specificity	60.4 (54.0-66.6)
TIPRL/LC3/CD133/CD44	54.1 % (0.49-0.60), p = 0.17	Sensitivity	50.0 (41.7-58.3)	-0.65	Sensitivity	15.5 (10.1-22.4)	66.8 % (0.62-0.72), p < 0.0001	Sensitivity	100 (98.4-100)	-0.005	Sensitivity	100 (98.4-100)		TIPRL/LC3/CD133/CD46	52.2 % (0.47-0.58), p = 0.45	Sensitivity	50.0 (41.8-58.2)	0.2	Sensitivity	74.3 (66.6-81.1)	73.0 % (0.69-0.77), p < 0.0001	Sensitivity	100 (99.1-100)	-0.0008	Sensitivity	100 (99.1-100)
		Specificity	49.6 (43.6-55.7)		Specificity	88.0 (83.6-91.6)		Specificity	50.7 (44.7-56.8)		Specificity	50.7 (44.7-56.8)				Specificity	48.4 (42.5-54.4)		Specificity	36.8 (31.1-42.7)		Specificity	57.7 (51.8-63.5)		Specificity	57.7 (51.8-63.5)
