# Supplementary material for: The Human TOR Signaling Regulator Is the Key Indicator of Liver Cancer Patients’ Overall Survival: TIPRL/LC3/CD133/CD44 as Potential Biomarkers for Early Liver Cancers
Source: Cancers (Basel). 2021 Jun 11;13(12):2925. doi: 10.3390/cancers13122925 (PMC8230774; doi:10.3390/cancers13122925)
Supplement: Supplementary file 1 [file cancers-13-02925-s001.zip › Table S12.xlsx]

## Sheet: Sheet1
Table S12. List of Oligonucleotides used in this study
PCR primers
Genes	Forward			Reverse			PCR product (base pairs)
TIPRL	GCCATCTCTCCCTGAAATGA			GTTCCGTGAAGAGGGAAGGT			380
LC3	CGTCCTGGACAAGACCAAGT			CTCGTCTTTCTCCTGCTCGT			181
ATG7	TGCTGCAAGCAAGAGAAAGC			AAGGTCCGGTCTCTGGTTGA			400
CD133	TTGTGGACCATCACCAGGTA			TCAGATCTGTGAACGCCTTG			162
CD44	AAGGTGGAGCAAACACAACC			CCACATTCTGCAGGTTCCTT			315
CD46	CGTGCTGCTCCAGAGTGTAA			CTGGACGCTGGAGATTTTGT			287
Oct.4	AGTGAGAGGCAACCTGGAGA			GTGAAGTGAGGGCTCCCATA			273
Nanog	TGTGATTTGTGGGCCTGAAG			TCTTGACCGGGACCTTGTCT			206
SOX-2	ATGAAGGAGCACCCGGATTA			TGCTGCGAGTAGGACATGCT			386
LIN-28	GGTCTGGAATCCATCCGTGT			AGCGGACATGAGGCTACCAT			221
GAPDH	AGTGATGGCATGGACTGTGG			ACCATCTTCCAGGAGCGAGA			300
siRNA sequences							working con. (nM)
Control	AUGAACGUGAAUUGCUCAATT			UUGAGCAAUUCACGUUCAUTT			100
1st TIPRL	CCUAAUGAAAUAUCCCAGUAUUU			AUACUGGGAUAUUUCAUUAGGUU			100
2nd TIPRL	CUGCCUCAGCCAUGAUGAU			AUCAUCAUGGCUGAGGCAG			100
CD133	GUGUCGUUGCUGUAACAAAtt			UUUGUUACAGCAACGACACat			100
CD44	CAGUGUUUUCAACCUCGAAtt			UUCGAGGUUGAAAACAGUGtt			100
ATG7	sc-41447, SCBT						100
CD46	sc-35004, SCBT						100
